# Supplementary material for: Differential isoform expression and alternative splicing in sex determination in mice
Source: Springer Nature journal article supplement (doi:10.1186/s12864-019-5572-x), 2019-03-12
Supplement: 12864_2019_5572_MOESM20_ESM.pdf [file 12864_2019_5572_MOESM20_ESM.pdf]

## Overexpressed genes in male

Comparison with Zhao *et al*, 2018

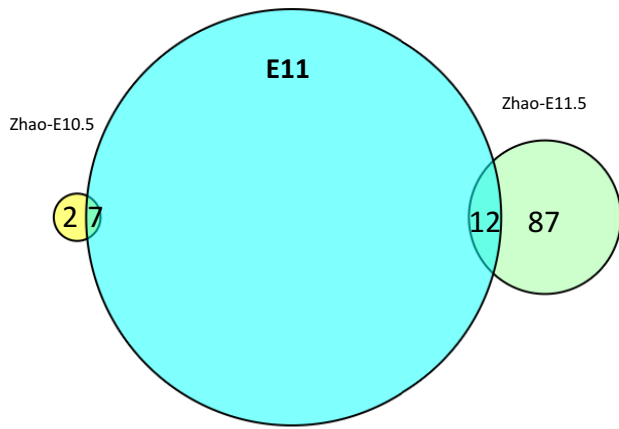

697 genes found in our analysis

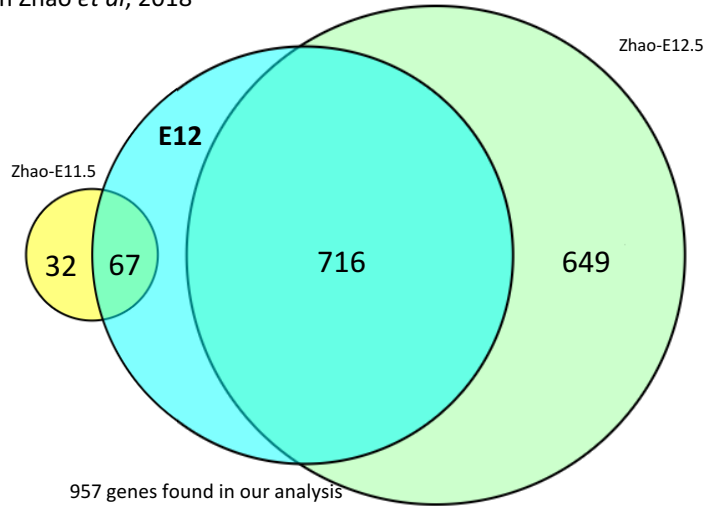

957 genes found in our analysis

## Overexpressed genes in female

Comparison with Zhao *et al*, 2018

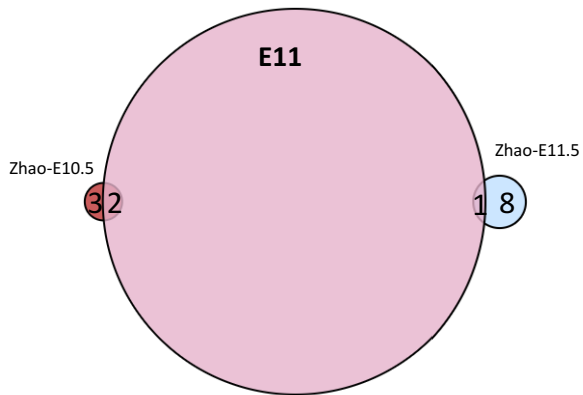

531 genes found in our analysis

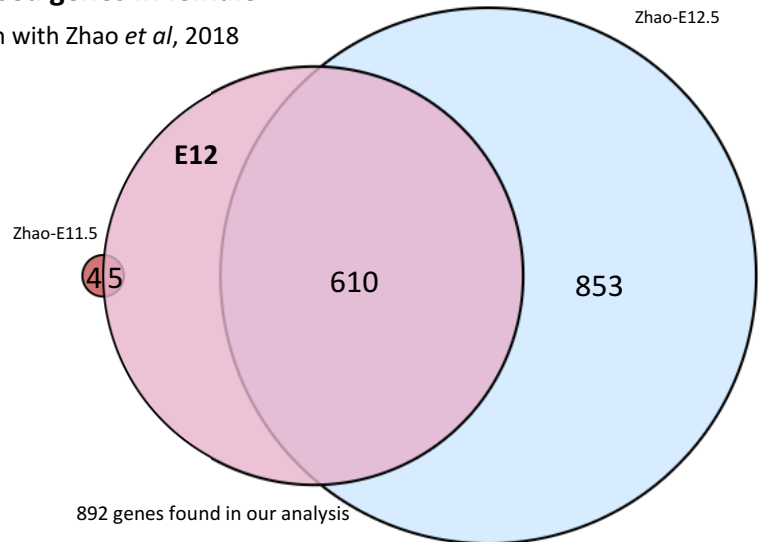

892 genes found in our analysis
