# Supplementary material for: Differential isoform expression and alternative splicing in sex determination in mice
Source: Springer Nature journal article supplement (doi:10.1186/s12864-019-5572-x), 2019-03-12

## Overexpressed transcripts in male

Comparison with Zhao *et al*, 2018

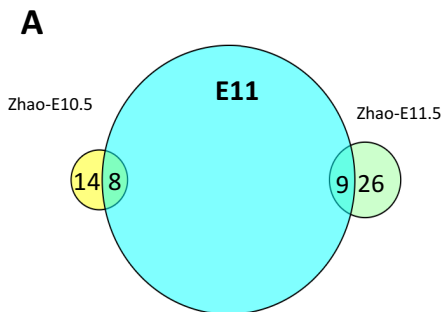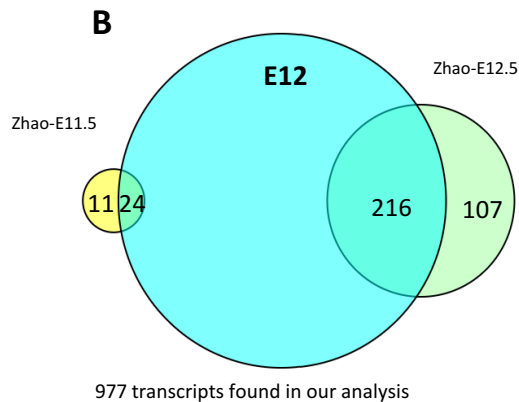

## Overexpressed transcripts in female

Comparison with Zhao *et al*, 2018

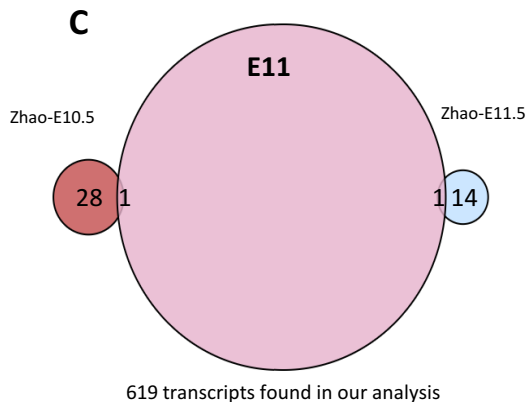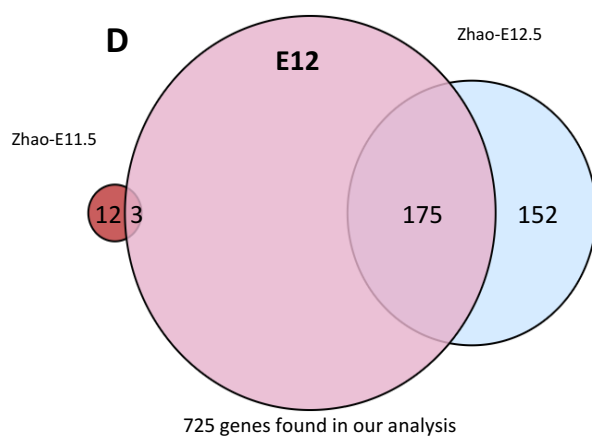

Supplement: 12864_2019_5572_MOESM21_ESM.pdf [file 12864_2019_5572_MOESM21_ESM.pdf]
