# Supplementary material for: Differential isoform expression and alternative splicing in sex determination in mice
Source: BMC Genomics. 2019 Mar 12;20:202. doi: 10.1186/s12864-019-5572-x (PMC6419433; doi:10.1186/s12864-019-5572-x)
Supplement: Supplementary file 7 — List of genes (A) and isoforms (B) showing male- or female biased expression. (XLSX 481 kb) [file 12864_2019_5572_MOESM7_ESM.xlsx]

## Sheet: (A).Genes
E12DOWN in Male	E12UP in Male	Male biased genes	E12DOWN in Female	E12UP in Female	Female biased genes
Gm13394	Amh	Amh	Gm13394	Stk31	Fst
Rps2-ps13	Ptgds	Col9a3	Nefl	Dazl	Chrm4
Gm15772	Dhh	Dhh	Gm14226	Ptpro	Msx1
Vcp-rs	Tesc	Tesc	Rps2-ps13	Hmgcs2	Phlda2
Foxd1	Aard	Mro	Vcp-rs	Gnpda1	4930563E18Rik
Crabp1	Ren1	Prokr2	Col2a1	Ddx4	Foxl2
Hmgb1-ps7	Defb19	Smoc2	Nefm	Rpl26	Sprr2d
Efemp1	Gstm6	Sox10	Gm15772	Nlrp4c	Porcn
Flrt3	Eps8	Ren1	Iigp1	Fst	Lrrn1
Ecm1	Prss35	Cbln4	Rprm	Mov10l1	Tmem171
Rgs5	Cyp17a1	Cbln1	Ntrk2	Dcaf12l1	Gdpd2
Ntrk2	Rtn4rl1	Col2a1	Cldn8	Gstm6	Tnfrsf19
Rarb	Aldh1a1	Mmd2	Tagln	Rpsa-ps10	Fam196b
Cdh6	Cbln1	Defb19	Foxf1	Acsbg1	Stum
Shisa3	Stk31	Tmem184a	Alx1	Lgr4	Calcoco2
Alx1	Col9a3	Serpine2	Cdh16	Foxr1	Lzts1
Angpt1	Rpl26	Hhip	Isl1	Cpeb1	Lypd6b
Hoxc5	Lefty2	Lefty2	Ptx3	Tdrd5	Sp5
Grb7	Acsbg1	Fbln2	Hmgb1-ps7	Slc25a31	Scrt2
Cldn6	Me1	Padi2	Hnf1b	Papln	Col12a1
Rprm	Atp1b2	Cyp26b1	Hoxb3os	Hormad1	Drp2
Cldn8	Kazald1	Ptgds	Fndc3c1	Piwil2	Wnt4
Alx4	Ankrd63	Gdnf	Kif12	Gpat2	Adamts19
Fst	Gstm2	Tinagl1	Actg2	Tex14	Gm45765
Tbx3	Hsd3b1	Map3k21	Pitx2	Rbm44	Calb1
Ddr2	Tmem184a	Hcrtr1	Nkx2-3	Gm4779	Wnt9a
Gm14226	Col9a2	Ankrd63	Dpysl3	Gstm3	Lypd6
Gata3	Ddx4	Sox8	Dbh	Gm19553	Myh8
Crabp2	Fzd9	Fstl4	Vwf	Gas6	6330411D24Rik
Calb1	Tinagl1	Trim47	Wnt9b	Tuba3a	Dcaf12l1
Wnt9b	Socs2	Fzd9	Foxd2	Pim1	Irx3
Adamts18	Prokr2	Gjb2	Foxd1	Fkbp6	Nr6a1
Cldn4	Trim47	Tmem200b	Angpt2	Dmrt1	Gm45766
Prss23	Lefty1	Kcns2	Gm8615	Syce1	Cgn
Hoxb6	Hba-a2	Dtna	Frzb	Hba-a2	Tshr
Agtr2	Cbln4	Ptk2b	Rgs5	Map7d2	Gata2
Prrx1	Utf1	Gli1	Adh1	Foxl2	Gxylt2
Tmem119	Dok7	Hck	Tbx18	Nrn1	Gm44732
Spint1	Hcrtr1	Cyp17a1	Cnn1	Csgalnact1	Isx
Postn	Nlrp4c	Sowahb	Tlx2	Rnf17	Thbs2
Fndc3c1	Myo1a	Aard	Prdm6	Lrrc34	Gm2245
6330403K07Rik	Fbln2	Pitx2	Acta2	Dnd1	Bace2
1700011H14Rik	Cpeb1	Gstm6	Ascl1	Cpa2	Msx2
Epha7	Kcns2	Enpep	Actc1	Smc1b	Gm14866
Clec18a	Dazl	Kazald1	Alx4	Smpdl3b	Thsd7b
Hoxb5os	Rpsa-ps10	Sostdc1	Hoxb2	Asz1	Lrrc34
Hbb-bh1	Fstl4	Rerg	Smoc2	Gdpd2	Dock4
Igf2	Ppp1r16b	Olfml3	Foxc1	Aldh1b1	Cdkn1c
Hoxb3os	Mmd2	Lefty1	Fam19a2	Zglp1	Kcnd2
Meis2	Gatm	Mt3	Crabp1	Lgals7	Bmp2
Gfra3	Ptpro	Col9a2	Mab21l2	Tmem171	Fam129a
Prom1	Arhgdig	8030411F24Rik	Hoxa5	Myo1a	D630039A03Rik
Zcchc18	Gstm1	Ppp1r16b	Dach2	Sema5b	Akr1c14
Dach2	Mt3	Vnn1	Col11a1	Prcd	Stra8
Stra6	Adora1	Hsd3b1	Pth1r	Hsf2bp	Smim10l2a
Cd248	8030411F24Rik	Pak3	Phox2b	Parp12	Sulf1
Ror1	Hsd17b3	Tox2	Hoxb6	Sall4	Gm7666
Gata2	Chp2	Fgf9	Cdh6	Mael	Kcng4
Nr2f1	Fdxr	Casq2	Jag1	Tfap2c	Irx3os
Fras1	Gjb2	Robo2	Fibin	Alpl	Cacna1d
Scg5	Cspg5	Stc1	Foxc2	Wnt6	E330013P04Rik
H19	Mro	Rtn4rl1	Cthrc1	Plcg2	Rspo1
Cthrc1	AI506816	Foxs1	Gfra1	Arx	Slitrk1
Gm4875	Rpl29	Adamts16	Efna5	Kctd14	Cdx2
Aldh1a2	Gm2694	Pltp	Th	6330411D24Rik	Foxl2os
Adamts1	Enpep	Nt5e	Hlx	Epb41l4b	Dclk1
Kif12	Tacr3	Smtnl2	Slitrk6	Adora1	Runx1
Lrrtm1	Aldh1a7	Osr2	Tbx3	Rhox9	Itpr2
Hoxb2	Paip1	Thbd	Bcl11a	Fbxo15	Tns4
Hoxa5	Gm9625	Ctrb1	Foxd2os	Sox2	Adm
Alx3	Rasgef1b	Cspg5	Prss23	Fndc5	Taf7l
Meis1	Robo2	Islr2	Nr1h5	Pcsk6	Colec12
Tacstd2	Dppa5a	Gem	Tmem119	Rpl29	Alg13
Tmprss2	Elmo1	Mall	Prrx1	Fam129a	Adtrp
Nefm	Etv5	Gstm1	Mmp16	Rbmxl2	Myo5b
Lyve1	Pdyn	Gm13031	Gm22000	Gm17232	Igfbp2
Cpm	Tspan15	Col27a1	Hoxc8	Cgn	Sall3
Foxc1	Hormad1	Slc38a5	Sox10	Tmem255b	Emx2
Hoxc8	Chchd10	Gatm	Chrdl1	Nr6a1	Slc22a18
Pcdh7	Serpinb1a	Fam83f	Lrrtm1	Dppa2	Olfm1
Prl3b1	Ptk2b	Gprin3	Sox9	M1ap	Gm42609
Tbx18	Mical2	Otof	Tmprss2	Ap3b2	Podxl
Nsg2	Smc1b	Avpr1a	Adam12	Fam169a	Phf19
Edil3	Tdrd5	Gfra1	Asb4	Alg13	Csgalnact1
Cdh2	Mov10l1	Ripor2	Gap43	Tcl1	Prkcd
Tspan12	Trank1	Itga4	Hebp1	Prdm14	Wdr49
Tmem52b	Otof	Igfbp7	Rarb	Sh2d4a	Ptpn4
Gm44732	Foxr1	Dok7	Edil3	Rpp25	Sbspon
Rdh10	Gem	Stc2	Tll1	Slc35f2	Dmpk
Tfap2b	Plcb2	Sorcs2	Parm1	Gldc	Fgfr2
Gm20559	Rbm44	Mapk13	Dlx2	Liph	Rasgrp1
Hoxa9	Gsg1l	Prss12	Gm16559	Taf4b	Sohlh1
Gm10039	Foxs1	Sel1l3	Glipr2	Pou5f1	Elfn1
Cdkn1c	Slc45a4	Mical2	Moxd1	Isl2	Agtr1a
Prss23os	Ctrb1	Tmem100	Ccnd1	Adamts19	Cpa2
Gm266	Tcl1	3110035E14Rik	Gja5	Adad2	Pld1
Afp	Rnd2	Cltb	Clec18a	Slc4a11	Ano1
Eno3	Krt222	Diras2	L1cam	Plxdc1	Vrtn
Ntm	Dppa4	Acap1	Foxf2	Dppa4	Gas6
Gm4366	Col14a1	Dusp15	Prss23os	Dclk1	M1ap
Chrm4	Parp12	Stox2	Hand2	Kank3	Prcd
Hoxa7	St3gal4	Atp1a3	Scg5	Tex19.1	Egfl6
Ptx3	Adgrg1	Col18a1	Cldn1	Stim1	Ifnar1
Pbx1	Slc25a31	Fam19a2	Nr2f1	8030474K03Rik	Dsc2
Scnn1b	Mapk13	5830411N06Rik	Ackr3	Atp1b2	Rhox9
Zfp691	Nr4a1	C1qtnf3	Sfrp2	Gpr37	Dnah8
Hnf1b	Adamts16	Etv1	Flrt3	Sp5	Hpse
Wnt4	Serpine2	Plcxd3	Lyve1	Fastkd1	Tph2
Pax2	AU018091	Miox	Igfbp3	Bace2	Reep1
Mmrn1	Tex11	Dtx4	Sim1	Slitrk1	Rhox6
Gm21814	Tex14	Plxnb3	Clstn2	Pls1	Lrriq4
Car4	Ddit4l	Ntf3	Gm4875	Dppa3	Cntn5
Dach1	Afap1l2	Hsd17b3	Fzd4	4930447C04Rik	Dab1
Cldn7	Casq2	Gm2694	Vcan	Nlrp12	Pitpnm3
Hemgn	Gm14513	Heyl	Sytl2	Ddx58	Cib2
Slc1a3	Lgr4	St3gal4	Nfatc4	Utf1	Gm28085
Plch1	Gata4	Col4a4	Fign	Amhr2	Rnf43
Pamr1	Gjb3	Masp1	Mamdc2	AU018091	Arhgef19
Gm13256	Srpx2	Col14a1	Asic4	C1qtnf7	Actr6
Tes	Slc29a1	Tspan32	Meis2	Lzts1	Fndc5
Plet1	Gm13577	Papss2	Gli1	Tex11	Lef1
Mapk15	Fastkd1	Lamc3	Gm20559	Arl14epl	Cdkn1a
Esrrg	Plxnc1	Prss35	Col8a1	Calcoco2	Nmur2
H2-D1	Piwil2	Fbln7	Lamc2	Pmm1	Irx5
BC030500	Ripor2	Adh1	Col9a1	Ifitm1	Cntnap5a
Hoxb7	Gm14038	Slc13a2	Uncx	Got1l1	Tmem178
Scnn1g	Pcsk6	Paqr5	Twist1	Klf8	Ctxn3
Foxc2	8030474K03Rik	Clca3a1	Cxcl12	Ifi27	Slc28a1
Scara3	A330041J22Rik	Aldh1a1	Diras2	Tbx4	1700061G19Rik
Foxp1	Adcy7	Mybpc3	Gm26771	Wfdc1	Ifitm1
Cldn9	Gas7	Tspan15	Nnat	Gna14	Stx11
0610040J01Rik	C430049E01Rik	Vstm4	Mfap4	Bmp2	Tkt
Stac2	Sphk1	Cadps	Gpc3	Dusp5	NA
Sfrp2	Sox9	Kcnh1	Fzd1	Klf5	Mbnl3
Slc22a3	Sel1l3	Gsg1l	Foxp4	Nexmif	Papln
Kcnj16	Mybpc3	Hapln3	Grik2	Gm9625	Vgll2
Dcdc2a	Dppa3	Fam46c	Crispld2	Sohlh2	Aqp3
Hpn	Bst2	Grb14	Adamts20	Vrtn	Myl9
Wfdc15b	Itgb5	Rab20	Gpr85	Mkrn1	Klf17
Car14	Taf4b	Gas7	Spock3	Gm26885	Ttc38
Hebp1	Igfbp7	Egflam	Serinc2	Pcgf5	Trnp1
Slc12a1	Tuba3a	Cnmd	Ddr2	Lrrn1	Emx2os
Pcsk9	Zc3hav1	Gm8615	Chgb	Serpinb6b	Fat4
Col11a1	Col6a1	Spry4	Slc12a1	Enpp3	Hmgcs2
Tmem59l	A530016L24Rik	Afap1l2	Olfml3	Gprc5b	Mapk8ip2
Serpinf2	Gstm7	Inhba	Twist2	Kcnt1	Mid1ip1
Osr1	Liph	Cnga1	Mecom	Entpd2	Lhpp
Jag1	Mamld1	Smtn	Gm4366	Rhox6	Zglp1
F2r	Slc7a5	Ctgf	Tnc	Tdrp	Arhgap29
Foxd2	Clca3a1	Pcsk5	Fras1	Socs2	Gm14493
Cdh10	Susd3	Robo1	Cnn2	Kcnh3	Tmem255b
Zfp663	Hsf2bp	Hsd17b1	Tox	Syce2	Slc5a10
Hist3h2ba	Pdzd2	Acer3	Synpo	Paip1	B3gnt7
Cpn1	Hsd17b1	Trac	Esrrg	Coq8a	Hdc
Rspo3	Adhfe1	Sfrp4	Tmem52b	Mreg	Dapk1
Sdk2	Cx3cl1	Cped1	4932441J04Rik	Gm7666	Asns
Coro1a	Wnt3	Rasl12	Prl3b1	Pgbd5	Kcnq1
Muc1	Sox15	Gpx3	Gfra3	Dhrs7	Haao
Phactr2	Nrbp2	Ahsg	Tfap2b	Cst8	Myl1
Tmem132c	Itga11	Spry1	Angpt1	Cib2	Gm45889
Rbp1	Stc2	Gm16559	Zcchc18	Phf19	Magi2
Mgam	2610035D17Rik	Gm14226	Dact1	Porcn	Kcnt1
Mybpc1	AU015836	Tspan11	Ncs1	Esco2	Gldc
Moxd1	Gpat2	Ptch1	Hnf4a	Gm14866	Dnaaf3
Clip3	Vnn1	Grem2	Lmx1a	Smoc1	Cd164l2
Uncx	AI427809	Nr4a1	Megf10	Ifitm3	Wdr72
Hoxa11	Pla2g4e	Dusp6	Gulp1	1700022I11Rik	Akr1c18
A830082K12Rik	Tmprss13	Krt79	Pcdh7	Gm6871	Dmrta1
Cldn1	Aldh3b1	Vcam1	Nsg2	Prdm1	Prr36
Spon2	Lgr5	Zar1	Hey2	Sgpp1	Zfp703
H2-DMb2	Pak3	Mal	Cdh2	Trim12a	Pld5
Runx2	Col27a1	Dkk1	Ptn	Actr3b	Soat1
Sim1	1700022I11Rik	Proc	4930474H06Rik	Taf7	Smtnl1
Clmp	Fkbp6	Efhd2	Itga4	Tex15	Plxna4
Iigp1	Krt79	Fam189a1	Runx2	Sh3tc2	Gm43352
Hoxb3	Zscan5b	Tpd52l1	H2-D1	Pdpn	Pde8b
Wfdc2	Clu	Adamts2	Lrig3	Ablim3	Nr2e3
Nefl	Cnga1	Col9a1	S1pr3	Syt9	Svopl
Ptpru	Mael	Duox2	Cttnbp2	Gjb3	Rec8
Bmf	Tcfl5	Plod2	Bmper	Nmt2	Tfap2c
Igsf9	Gm43240	Gjb1	Cxxc4	Kcng4	Hand1
Gm17473	Sorcs2	Bhlhe40	Prickle2	AA414768	Nos1
Pdgfc	Shbg	Scara5	Dact3	Ube2l6	Laptm4b
Rxfp3	Map7d2	Tagln2	Efna3	Gm42609	Gm37509
Pou3f3	Gm4779	Chst1	Robo1	Etnk2	Neu3
Chst13	Stim1	Me1	Hoxa9	Elfn1	Cntn4
Akr1c19	Scgn	Nedd9	Gcnt1	Lin28a	Prrt4
Mdk	Dmrt3	Zan	Nog	Adgrg1	Kitl
Hoxa3	Akr1b8	Gm11946	BC030500	Plcd1	Capn1
Id3	Nedd9	Eps8	Pax1	Hells	Fam83g
Twist2	Rasl12	Hic1	Tmem229a	Tnfrsf19	Bhlha15
Plagl1	Kcnh1	Rnf181	Bicc1	Sptbn2	Hs3st1
Gm27483	Rbmxl2	Clu	Scara3	Tuba3b	Smpx
Lama5	Pla2g5	Synj2	0610040J01Rik	Tdh	Rrad
4932441J04Rik	Uba1y	Tbx2	Nrp1	Gstm2	Zfp277
Ccdc80	Rimbp2	Bgn	Elovl2	1700061G19Rik	1700013H16Rik
Hoxb8	Slc13a2	Nipal1	Hoxa7	Colec12	Slc41a3
Shd	Rgn	Arhgap6	Gm6356	Myh8	Smpdl3b
Plac8	Htra1	Glipr2	Acta1	Tst	Plch1
Efna3	Miox	Lrrn3	Bmp4	Sycp3	Aldh1b1
Lhfp	Amd2	Fam19a5	Gm5436	Smpx	Frmd6
Rhcg	Wfdc1	Vcan	D030062O11Rik	Rhox5	Krt20
Basp1	Nodal	Akr1b8	Nkx3-2	Cpsf4l	Ces1h
Fat4	Gmpr	Slc34a2	Has2	Tmem35a	Prkd1
Gm5436	Arl14epl	Jakmip2	Scrn1	Cygb	Daam2
Pbx3	Plcg2	Gm15270	Mal	Asns	Adgrl3
Habp2	2410018L13Rik	Cited1	Col23a1	Pank1	Rgs2
Hoxd1	Rnf17	Gmpr	Pamr1	Dppa5a	Anpep
Col1a1	Ralgps2	6030408B16Rik	Cdh18	Gm13577	Osbp2
G6pc2	Sfrp4	Kcnd3	Postn	Best1	Nrap
Fibin	Prdm1	Pkdcc	Tspyl4	Nanog	Npnt
Brinp1	Thbd	Scarb2	Gpr17	Bclaf3	Tspan1
Ano1	Rhox8	Mamld1	Slc1a3	Fam196b	Trabd2b
Tenm3	Col18a1	Myh14	Ntrk3	Stag3	Nrn1
Ptn	Rcan1	Pcdh8	Hoxc5	Ube2t	Abcc2
Ibsp	Mkx	Itga9	Pkia	Rasgrp1	Car5b
Hoxb5	Smtnl2	Crhr1	Pou3f3	Terf1	Ppara
Nrk	Otog	Ppargc1a	Gm7292	Gm2245	Clec2l
Hoxc9	Cnmd	Pnmt	Bmp5	Gm10324	Emb
Slitrk6	Sema5b	Myadm	Sgpp2	Siah1b	Klhl5
Hnf1a	Tsku	Epyc	Rxfp3	A230005M16Rik	Sstr3
Msx1	Dusp4	Tnfrsf12a	Gm17473	Zcwpw1	Aldoc
Asb4	Emilin3	Pmaip1	Pdzrn3	Arhgef19	Ccdc182
Dpp4	Cdh23	Serinc5	Gpx3	Psma8	Epha7
Gm29100	Pou5f1	Gm35065	Mmrn1	Cyct	4930548H24Rik
Epb41l3	Dtna	Gm27820	Ednrb	Sybu	Pank1
Nfatc4	Psors1c2	Wnt3	Phactr2	Irx3	Entpd2
Serinc2	BC034090	Gstm2-ps1	B3gnt5	AU022751	Ovol1
Tgm5	Mybphl	Kcne1l	Cldn6	2610028E06Rik	Nkd1
Irx1	Mpped1	Erbb3	Basp1	Rspo1	Kcnh3
Grik4	Slc52a3	Gpc3	Kcnj16	Abcg1	S1pr1
Grhl2	Ptpn5	Tnnc1	Cobl	Pik3cd	Pik3r3
1700025A08Rik	Smad2	BC006965	Gpc6	Fam178b	Mybpc1
Crispld1	Spry4	Jsrp1	Hand1	Mta3	Adgrb2
Mcoln3	Crhr1	Plppr5	Dlk1	Foxh1	Orc1
Nkd1	Nt5dc3	Siglece	Rgs4	Gm14038	Gm21083
Lbp	Plxnb3	Bex2	Hbb-bh1	Reep1	Plbd1
Lix1	Acer3	Htr6	Scnn1b	Pnldc1	Cd83
L1cam	Col4a4	Abtb2	Hoxaas3	Zfp385b	Wt1os
Foxp2	Gnpda1	Slc9a2	Rspo3	Ddit4l	Col22a1
Pid1	Inhbb	Mef2c	Dcdc2a	Plekhg4	Lrrc8e
Elovl2	Grem2	Gm42922	Unc5c	Espn	Magi1
Gm10704	Akr1cl	Pdyn	Gm26903	Trim71	Gm12743
Ltbp1	Cyp26b1	Cst9	Ntm	Ifngr2	Cdh9
Fzd2	Pcp4l1	Zfy1	Spon2	Mybl2	Tmc1
F2rl1	Jade1	Qsox2	Crmp1	Igfbp2	Nacc2
Rbms3	Abcg1	Ntf5	Hoxa4	Sprr2d	Ablim3
Asic4	Kndc1	Nkd2	Tuba1a	Ptpn6	Slc2a3
Hoxaas3	Adad2	Tyro3	H2-DMb2	Rundc3b	Fndc1
Gm11702	Tex12	Spats2l	Spint1	Gdf3	Gprc5a
Krt18	Mcrip2	Efna5	Fam84a	Ooep	Ptpro
Pdzrn3	Gm39090	Scx	Lsp1	Nr0b1	Adam8
Igdcc3	Adcyap1r1	Rasgef1b	Cpm	Ldhb	B230208H11Rik
Emx2os	Asz1	Col4a1	Zfp663	Tmem206	Nlrp9b
Pcdh20	Dnd1	Btnl9	Dock10	Elavl2	Stxbp1
Meis3	Ldhb	Gm26719	Pcdhgb7	Zic3	Lor
Mpo	Trim12a	Gm6665	Gm266	Eps8	Tgm3
Rspo2	Etnk2	Adamts5	Rnd3	Pld1	Isl2
Ocln	Rnf181	Rasgef1c	Tgm5	Phf11d	Klf8
Frzb	Kif19a	Plekhs1	Pcdh19	Pax6	Grik5
Des	Alpl	Wisp1	Sncaip	Ccdc172	Frem2
Cpb2	Tbx4	1110032F04Rik	Efnb2	Tex2	Tspan33
Flywch2	Gna14	Parm1	C1qtnf3	Actr6	Rasl10b
Ndst3	Cyp11a1	Mmp2	Hemgn	Scml2	Kcng1
Hnf4a	Trap1a	Enpp6	Cd248	Tdrkh	BC023105
Crlf1	Tdh	Tmem198	Slit3	Chchd10	Dlx3
Cxcl13	Gstm2-ps1	Mafk	Thbs3	Msx1	Gata3
Gpr45	Khdc3	Serpinb1a	Osr2	Thsd7b	Cfap161
Hkdc1	Enpp3	Rnd3	Mybpc1	Stk38l	Kdm3a
Dpysl4	Tmem86a	Agpat4	Hoxa3	Rnd2	Ugt2b36
Dpysl3	Stc1	Gm34866	Avpr1a	Prkcz	A430078G23Rik
Mmp16	Pik3cb	Eya1	Slc22a3	Stx11	Pik3r1
Cox7b	Itih5l-ps	Gpm6b	Frmd4a	Mogat2	Nlrp12
Hoxa10	Egflam	Itgb8	Nptx1	Arhgdig	Cdkn1b
Emid1	Rab6b	Colec11	Foxp1	Lrriq4	Ofd1
Glb1l2	Pmm1	Inhbb	Tubb3	Rgs11	Mcf2
Cela1	Ly6g6e	Mapk4	Rbms3	Zc3hav1	Kcnip1
Sema3c	Duox2	Dact1	Dkk1	Nr5a1	Myh13
Phldb2	Pik3cd	C7	Capn6	Gm10244	4930523C07Rik
Daam2	Proser2	Otx2	Hoxb3	Tigar	Sall4
Svopl	Pgbd5	Steap4	1700011H14Rik	Orc1	Pcsk9
Gm26771	Arx	Irs2	Gm23134	Rps15a-ps7	Gm14565
Lrp2	Fam169a	Kif19a	4930426D05Rik	Tnnt1	Atp6ap1l
Slc16a12	Fam46c	Adamts9	Plagl1	Rbm46	Gjb4
Adtrp	Creb3l1	Susd3	Hapln1	Bmyc	Gm15873
Ccdc40	Gprin3	Ctsw	F2r	Epx	Cyp1a1
Crispld2	Fbxo15	Serpina3b	Gm29100	Mettl24	Srxn1
Foxd2os	Mapk4	Itih5l-ps	Ap1s2	Itga6	Necab3
Arhgap28	Pcsk5	Efhd1	Prkg1	Clec2l	Gm45371
Plvap	Nabp1	Cd40	Corin	Esrrb	Gca
Csf1	Umodl1	Lpcat2	Gm11702	F930015N05Rik	Rassf10
Gm18194	Kit	Ppp1r1b	Gata3	Trank1	Axin2
Slc39a5	Gm9770	Tmem117	Gria2	Stum	Crabp1
Tll1	AU022751	Slco3a1	Tgfb2	Glt1d1	Fam160a1
Olfm2	Cela3b	Slc29a1	Alx3	CN725425	Mogat2
Pcdh19	Qsox2	C1ql2	Scnn1g	Ttc39b	Gm26626
Col12a1	Gm8730	Fgf10	Tbx20	Jakmip1	Cdcp1
Ptgfr	Stox2	Galnt10	Hoxb5os	D630039A03Rik	G6pc2
Gm11532	Cercam	Zfp488	Ror1	Trnp1	Amph
Arnt2	Sin3b	Gli2	Zfp608	Akr1cl	Uap1l1
Eps8l2	Mall	Fgf13	Sostdc1	Gng13	Rilp
Gap43	Slc16a2	Adhfe1	Prss12	Foxl2os	Grik3
Sulf1	Rhox5	Hspa12a	Adamts15	Atp2b3	Wnt2b
Gm11505	Scarb1	Dll3	Ncam1	Slc37a1	Edn2
Trpc7	3110035E14Rik	Slc6a14	Colec11	Susd3	Gbx2
Dhcr24	Nphs1	Slc6a4	Hoxa6	Acot1	Tex15
Akr1c18	Ap3b2	Synm	Tmtc2	Klhl8	Itk
Hoxa6	Bex2	Npffr1	Hoxaas2	Sycp1	Dlg3
St6gal2	Efhd1	C430049E01Rik	Prom1	Atp10a	Gmnc
Cdh16	Gm17080	Foxp4	Foxp2	Plxna4	Trhde
Hba-x	Cpsf4l	Tpm1	Prox1	Inhbb	Sema4f
Trabd2b	Chit1	Ush1g	Nhsl2	Pnpla7	Ttc39b
Irx2	Wnt6	Fosl2	Dlx1	Pla2g10	Mreg
Id2	Tuba1c	Foxd2	Notch3	Lypd6b	Fam81a
Dmtn	Zfp296	Synpo	Clmp	Gabrb1	Hcn2
Pth1r	Zar1	Psrc1	Stac	Mir9-3hg	Gpat3
Napsa	Igsf23	Mylk	Mapk15	Trib3	Slc5a1
Sp6	Sdc4	Tacr3	Steap2	Rbm45	Arrdc4
Ddah2	Cbr3	B230322F03Rik	Hoxb4	Ppara	Uhrf1bp1l
Cldn3	Syce1	Chp2	Pag1	Klhdc4	Clstn3
Scube3	Zfp750	Bicc1	NA	D030056L22Rik	Gm13032
Tmem229a	Mfsd13a	Loxl2	Hsd11b2	Etv5	Fbxo15
Fbn2	Tdgf1	Gja5	A830082K12Rik	Zfp42	Stard10
Mecom	Fam83f	Gm17641	Adgrg3	Tbc1d25	Vav3
Syt11	Dennd2c	Steap1	Clip3	Spata5	Scd1
Galntl6	Esm1	Scrn1	Grb10	Aldh1a1	Tdrp
Hoxc10	Nr5a1	Fdxr	Fat3	Rps4l	Ccdc30
Adamtsl4	Naip5	Cd24a	Hoxb7	Txlng	Gbp2b
Prss8	Shisa2	Rassf5	Tagap	Hdc	Susd5
Aif1l	Rnf19a	Ccl17	Samd4	Stra8	Lgals7
Gm26870	Plxdc1	Tdgf1	Hoxd1	Abhd14b	Tmem132c
Klhl4	Ddx43	F3	Adamts1	Jak3	Plcg2
Bmp4	Pla1a	4930474H06Rik	Creb5	4930563E18Rik	Ppp2r2b
Gm28438	Esco2	Plcb2	Jakmip2	Dlgap3	Tbx4
Fzd4	Islr2	Serpina5	Mgam	Il17d	Tdh
Arl4c	Tspan11	Creb3l1	Cdh19	Tmem114	Dppa2
Lad1	Prdm14	Iqgap2	6330403K07Rik	Cacna1d	Kdf1
Lmx1a	Tuba3b	Fat3	Gm5514	Aldh1a7	Snca
Adgrg3	Zbtb32	Col4a2	Pbx1	Rgcc	Gm5850
Nnat	Zfp988	Cdh17	Shd	Tex12	Rab11fip4
Tmem178	Hhip	Plekha4	Ibsp	Lgr5	1010001N08Rik
Rmi2	Sall4	Tacc1	Spsb1	Cebpb	Lbx2
Dbn1	Plin1	St8sia2	Syt11	Laptm4b	Gm13554
Plet1os	Mkrn1	Sparc	Hkdc1	Cpne8	Stac2
Hoxaas2	Zyg11a	Fbxo32	Ttll11	Mtr	Wnt10a
Nrp1	Slc9a2	Ptpn5	Ntf3	Tex10	Ak7
B4galnt4	Gm6665	Pcp4l1	Crispld1	Nrtn	Gm30613
App	Tex10	Hist1h2bc	Pcdh20	Acsl1	Pak1
5730596B20Rik	Cltb	2610035D17Rik	Pnliprp2	Gm2a	Rasa4
Adh1	Prr23a3	Igsf3	Gm27530	Cbr3	Gm19817
Peg10	Gm19553	Mfsd2a	Padi2	Dcaf4	Prdm6
Car3	Nefh	Syt15	Pde3a	Tkt	Ecel1
Gm28876	Nlrp5	Bend7	Rerg	Gm11747	Txlng
Gm6356	Acp7	Aph1b	Grb7	Tmie	2900011O08Rik
Rac2	Sowahb	Prlr	Soga3	Bst2	Flrt3
Ncam1	Clca3a2	Foxc1	Slc16a12	Cul4b	Coq8a
Ctxn3	Trac	Hmgn2	Hist3h2ba	Lbx2	Gm17232
Igfbp3	Elavl2	Hivep3	Oraov1	Il10rb	Bclaf3
Npnt	Col6a2	Dkk3	Stmn3	Fbxo31	Sdr42e1
Mamdc2	Olig1	Armcx2	Ank2	Chit1	Edn3
Ripply3	Alg13	A730049H05Rik	Ptpru	Irf1	6430710C18Rik
Hoxa4	Tbx2	Fblim1	Dab2	Cx3cl1	Gbp2
Thsd7a	Nexmif	Grin2c	Hpn	Rnf128	Abhd3
Eml1	Zswim1	Rcan1	Phldb2	Ccdc182	Sema3a
Myl9	Prlr	Cst8	Rtl3	Msrb2	Adrb3
Hoxb4	Hs3st3a1	Gldn	Gata5	Pitpnm3	Trpc5
Slc39a8	Sptbn2	Vipr1	Tspan2	Rhox2a	Ces2g
Cdh18	Gm6871	Kcnk2	Tmem27	Wnt9a	Cdk15
5730559C18Rik	Plcd1	Vwa1	AV026068	Mfsd13a	Sacs
Gm29430	Nr0b2	Sema5a	Gm15998	Tulp2	Tff2
Wdr86	Rps15a-ps7	Fgf18	Sdk2	Hormad2	Gpr55
Zfp804a	Papss2	Slc16a7	Zmiz1	Hs3st3a1	D130058E05Rik
Gm37264	Nr1d2	Epha2	Hap1	Rgs2	AA465934
Eno2	Hck	Sept11	Map1b	Zfp985	Pacsin1
Angpt2	N4bp2l1	Msc	Gm10039	Zbtb32	Lin28a
Thbs3	Ooep	Cend1	Klhl14	Prss35	Dnd1
Sgpp2	Col4a1	Gm5868	Adra1d	2310061I04Rik	Trim7
Cacnb3	Xlr4a	Bok	Osr1	Mpped1	Pcgf5
Draxin	CN725425	Ppp1r14c	Eya4	Ubash3a	Gpr160
Kynu	Hmgcs2	Ubash3b	Lpar1	Trpm5	Ccdc80
Clstn2	2010300C02Rik	Fgf16	Ddc	Rpl39l	Tmprss11f
Bmper	Spic	A330041J22Rik	Gpr45	Mbnl3	Gm45441
Tpbg	Gm10863	Gcnt1	Sfrp1	Pou2f3	Gabrb1
Mfap4	Kcnj3	Myo18a	Ankrd44	Trim6	Cers4
Sept3	Sgpp1	Lama4	Tub	Rhox8	C1qtnf4
Gm16096	Col4a3	Sct	Pcdhga11	Klhl13	Pglyrp1
Gm6505	Dlgap1	Barx1	St6gal2	Rpl34	Grb7
Emilin2	Star	Chchd10	Lhfp	Mtmr7	Eva1c
Ism1	Gdf3	Lpar1	Coro1a	Rex2	Rnf128
Gpc6	BC006965	Serpina3g	Crabp2	Nt5dc3	Plxna4os3
Fam84b	2610028E06Rik	Htra3	Meox1	Gca	Sorbs2
Plxna2	Vstm4	Atp1b2	Lrrc75b	Pla2g16	Ndrg1
B230206H07Rik	Nek2	Dock10	Arhgdib	Tmem174	Dock2
2610528J11Rik	Wsb2	Gm43240	Filip1l	Prkd1	A230005M16Rik
Flrt2	Gm2a	Atp2b4	Gm13187	Rnf213	Slc41a2
Cadm3	Fmr1nb	Jag1	Slitrk4	Trap1a	C230034O21Rik
Bmp5	Hjurp	Ngef	Rmi2	Zrsr2	Bag3
Rxfp2	Best1	Ston1	Rhcg	Igfbpl1	Fam117a
Smim10l2a	Tspan32	Col4a3	Lsamp	Rps2	Irf6
Mllt3	Tex19.1	Syt6	Arhgap36	Shbg	Dpcr1
Tagln	M1ap	Trib2	Gm16096	Smyd2	Slc35g1
Hs3st6	Zan	Gm17080	Slc39a5	Usp28	Shisa7
Gm10800	Hsd11b2	Gm42517	Gm47512	Nrbp2	Smc1b
Igfbp2	Zfp367	Trpc3	Col5a2	Myo5b	Syt13
Mfap2	Phf11d	Olfml2a	Zfp536	Mov10	Gm42583
Sall2	Tigar	Cebpa	Tpm2	Gstm1	Abca4
Hoxa11os	Ntf5	Cspg4	Igf1	St5	Itga6
Hmga2	Slc34a2	Fam184b	Plcxd3	Adamts16	Ddx4
Palm	Espn	Pmepa1	Gm18194	Hcn2	Gm17509
Cnn1	Gm6083	Slc16a2	Cdh10	Cep85	Igtp
Samd14	Ltbp4	Nodal	Tacstd2	Tnni3	Clic6
Tmtc2	Gm5067	Gm10863	Fibcd1	Nr1d2	Epb41l1
Gm10874	Spata21	Tmem63a	Slit1	Fndc1	Gm26700
Eya4	Cemip	Klhl14	4930538E20Rik	Gabra4	Abhd14b
Scrt2	Gldn	Inha	Fam107b	Jade1	Gm32710
Slc30a10	Efhd1os	Cxxc4	Hoxb5	Lhpp	Ifngr2
Spink1	Sh3tc2	Trank1	Popdc2	Umodl1	Stx1b
Bmpr1b	C1ql2	2610203C22Rik	Gata5os	Cenpv	Jakmip1
Pkp3	Siglece	Agt	Chst13	Rhpn2	Trim24
Chd3	Nt5e	Rcsd1	Hmga2	Pwwp2b	Scmh1
Spi1	Tex19.2	Ephx1	Brinp1	Cryl1	Gm18348
Gm7862	Igsf21	Nrg1	Prdm16	Dmrta1	Fam84b
Kif1a	Sox2	Spin2c	Dtx4	Zyg11a	Slc36a1
Gulp1	Itih5	Gpr182	Tmem30b	Cdx2	Cfap54
Ccnd1	Ccl17	N4bp2l1	Cyr61	Phlda2	Plcd3
Hoxc4	Dusp15	Mcrip2	Pappa	Aatf	Pde4a
Tmc4	Pnpla7	Star	Pax2	Uhrf1bp1l	Lmo7
Peg3	Myo7a	Lrrc58	Nes	Vars	Gnpda1
Hoxc6	Nanog	Slc27a6	Fbln5	Gm9770	Klhl8
Gm27786	Coch	Slco4a1	Eno2	Aurkc	Pik3ip1
Tmsb10	Dmrt1	AU021092	Ndnf	Plin1	Trpv4
Scd1	Klhdc4	BC034090	Msrb3	3110002H16Rik	Nucb2
Mal2	Lama3	Plppr4	Sema5a	Myl1	Klhdc7a
Mrc1	Adamts8	Mc2r	Slco3a1	Gpc4	1700097N02Rik
Tbx3os1	Gm34866	Kcnj3	Igf2	Ptpre	Dusp5
Tagap	Mgst2	Cdc42ep1	Sptssb	C1qtnf1	Sema3e
Bcl11a	Ngfr	Gm10680	Csf1	Bhlhe41	Slc30a5
Fli1	Otx2	Igfbp3	Eml1	Kifc2	Tex19.1
Ackr3	Egr1	6330403L08Rik	Scd2	Tle6	Tceal6
Gm5514	Slc6a14	Oxtr	Sema3c	Cc2d1b	Tmem35a
1700001O22Rik	Foxh1	Tmc3	Fstl1	Kdf1	Gm10814
Gm11223	Aurkc	Kdelr3	Lin7c	1700013H16Rik	Gstm3
Slc6a13	Ide	Csrp1	Ndst3	Tcfl5	Bmyc
Grik5	Sohlh2	Fat1	Elavl4	Fam221a	Insm1
Cdh9	Pls1	Rcn1	Mal2	Nol8	Irf9
Tspyl4	Serpina5	Gm16365	Pid1	Proser2	Cd44
Hoxa2	Usp43	Phlda3	Pdgfrb	Cry1	Arvcf
Rgl3	Smoc2	Arx	Vangl2	Camsap3	Gm17552
Fam20c	Spats2l	Slc6a8	Meis1	Gm14493	Nmnat2
Gpr183	Kctd14	Rangap1	Grhl2	Doc2b	Slc16a10
Parvg	Psma8	E230013L22Rik	Hoxb9	2410018L13Rik	Gata6
Pdzrn4	Ankrd13a	Hes5	Vopp1	Abhd3	Fam214a
Cxcl12	Upk2	Acvr1c	Fblim1	Cntn4	Tmem102
Lbh	Tdrkh	Rhpn1	Rnf165	Otog	Cachd1
Tagln3	Ptpre	Ptx3	Cavin2	Hat1	Epb41l4a
Slc38a4	Pgp	Bcar3	Adamts18	Mycn	Gm29477
Vcan	Gm7972	Slc13a2os	Fzd2	Ascl2	1110002J07Rik
Gm2574	Gm5345	Efhd1os	Foxl1	Gkap1	Acss1
Lypd6b	Tgif2-ps2	Gm43109	Igsf9	Fam169b	Rgs5
Twist1	Myof	Sec16b	Gm17501	Pdk4	Necab2
Hapln1	Meltf	Sphk1	Gm11149	Jade3	1700019D03Rik
B4galnt1	Arpc1b	Tshz3	Laptm5	Cbx7	Bhlhe41
C1s1	4930447C04Rik	Fam83d	Parvg	Gata4	Sgsm2
Gm15998	Mrpl48-ps	Tox	Hoxc6	Pipox	Pde10a
Ush1c	Jak1	Gpc1	Dok5	Znrf2	Icam5
Gm12407	Agt	Rnd2	Tmem100	Zfp473	Ggt1
Rassf10	Esrrb	Rprml	Tgfb3	Hpcal1	Car14
Gm10493	Adam33	Fabp5	Frk	Kndc1	Camkv
Prrx2	Tfap2c	Cela3b	Hipk2	Poli	Tnnt1
Tenm2	Rpl10l	Mal2	Slc18a2	Unc5a	Dach1
Bcat1	Tex21	Nts	Cdh11	Crnde	Amer2
Eddm3b	Gatsl3	Plk5	Elovl7	Grhpr	Ccdc136
Gm3739	Epb41l4b	Sema4a	Gm4353	Dock4	Acacb
Zfp608	Gm17232	Apoa4	Lbp	Fam83g	Atp12a
Tuba1a	Synm	Nppc	Sort1	Ide	Sema4d
Grik2	Padi2	Agmat	Rxfp1	Cpeb2	Sh3d21
Hmgn3	Fgf16	Rap2a	Epha4	Rab11fip1	Ptpn22
Ahnak	Serinc3	S1pr3	Bche	Slc7a2	Man1a
Gm28085	Ddx58	Lrp4	Slc10a4	Dennd2c	Zfp692
Sv2a	Gm11549	Dll4	Thsd7a	Oplah	Rnf213
Aqp3	Fkbp5	Cyp11a1	Fhl2	Paqr7	Pcbd1
Cdh8	Rpp25	Krt222	Grin2c	Deptor	Gm15441
Rnf112	Nfkbid	Slitrk2	Lgi2	Xrcc6	Gpat2
Prdm6	Rassf5	Art4	Rassf4	Tdrd12	Dpys
Tsc22d3	Mageb4	Pycr2	Dpysl4	Lypd6	Bcat1
Rnf165	Cp	Ppp1r13b	Lrp2	4930432K21Rik	Tuba4a
Wdr6	Serinc5	Sh2b2	Zfhx4	Rab35	BC048679
Gm4353	Zscan10	Iqch	Serpinf2	Caprin2	Dock9
Serpinf1	Hells	Creb5	Golt1b	Btbd18	Ahnak
Pthlh	Dlgap3	Cdh4	Fmn1	Mid1ip1	Gm17035
Fcrls	Gldc	Adcyap1r1	Map3k7cl	Ofd1	Kcnk10
Large2	Lrrc17	Prmt8	Gm37264	Hfm1	Ncmap
Oraov1	Kirrel2	Ednra	A730089K16Rik	Prrt4	Otop1
Sytl2	Actn2	Nid1	Dcx	Hpgd	Ints6
Cuedc1	Mybl1	Ctnna2	Gabrb2	Nuak2	Lsm12
Igfbp1	Grb14	Wnt11	Epm2aip1	Epn3	Cdh6
Tmem26	Sycp1	Tgfbr3	Bmx	Thg1l	Meiob
Gm15050	Cyp2b23	Gm2670	Cldn4	Mybphl	Txnip
Nxn	Hivep3	Mcam	Col25a1	Epp13	Zbtb7c
Tlr13	Enpp6	Tac2	Mcoln3	Spo11	Kcnc4
Gm16136	Fyn	Pdlim1	Cldn9	Sox15	Chga
Susd4	Tyro3	Hao2	Foxq1	Sobp	Prkg2
Ctxn1	Terf1	Tmeff2	Cers6	Pik3cb	Sohlh2
Gm23134	Trib3	Pclaf	Psd	Rasa4	Zic3
Gm47512	Slc35f2	Zcchc12	Nfasc	Drp2	Dgkk
Kcnh5	Col4a2	Fam212a	Efemp1	Rec114	Fgfr3
Gm42901	Pqlc1	Pla2g5	Tbx1	Gbx2	Sptbn5
Lrig3	Klhl21	Esm1	1700030F04Rik	Sil1	Spidr
Astn1	Stk17b	Gm11549	Ecm1	Prr19	Prkar1b
Bmp3	Gm43305	Lhx1	Nrep	Irx3os	Pcdh18
Fgfr2	Proc	Tnnt2	Sept3	Acadl	Cybrd1
Sptb	1700030C10Rik	Fhl2	Col1a2	Cbs	Epb41l4b
Gm15663	Kank3	Fgfrl1	Nrxn1	Prkcd	B4galt5
Crmp1	Vsig10	Pth1r	Zfp518b	Pdzd2	Gm10805
Lhx6	Erbb3	Cdh11	Gm11802	S1pr1	Fgd1
Lrp3	Stag3	Pgf	Spon1	Slc30a2	Sc5d
Cwc22	Mybl2	Rnf19a	Insm1	Isyna1	Xlr
Myrf	Wdr64	Gm38391	Cadm1	Cpt1a	Mir293
Igf1	Skor1	Arhgdig	Rai14	Tmem86a	Kcnip2
Lypd6	Cst3	Pknox2	Fn1	Necab3	Dhrs7
Gng2	Nmt2	Etnk2	Zfp9	Slc45a4	Pcf11
Tmem27	Cenpv	A630001G21Rik	Irx1	Tspo	Syn2
Foxq1	Ccdc172	Gm16192	Dbn1	Dennd1c	Rbfox1
Prkg1	Adamts2	P2ry2	Tek	Pacsin2	Glt1d1
Fzd1	Mnd1	Nr0b2	Galntl6	Zscan10	Gm11670
Has2	Hmgn2	Mfap4	Tmem252	Mphosph8	Tnni3
Col5a2	Pdgfra	Col23a1	Igsf5	Gm10499	Ptpn6
Prtg	Rps2	Wif1	Tcp11l1	Plcd3	Gdpd1
Tmem169	Zfp985	Gpr153	Meis3	Hsp90aa1	Cubn
Capn6	Rprml	Tmprss13	Pkdcc	Rpa2	Zhx2
Chrna3	Acap1	Sorcs3	Sphkap	Rab26	Ddx58
Tmem252	Gm10499	Khdc3	Adam11	Adamts14	Dpf1
Rarg	Fgf2	Kbtbd13	Heyl	Bcas3	Gm11131
Fap	Btnl9	Btn1a1	Plcb1	Htra1	Gm27786
F13a1	Abtb2	Ier5	Rnf112	Syt13	Dner
Cnih2	Dppa2	Ppp1r36	Rbp1	Adm	Scube3
Zim1	Adamtsl3	Sdc4	Nrk	Fbxo6	Syt9
Arg1	Lamc3	Gm26752	Gjb1	Fam214a	Kcnj12
Pax8	Jcad	Ppt1	Lama5	Lhx9	Emilin2
Zfp703	Olfml2a	Armcx3	Cyp26b1	Amd2	Ccnjl
Lum	Zfp42	Atp1a2	Unc5b	Ak7	Trpc1
Cobl	Emp1	Radil	Magt1	Larp1b	Mlxipl
Rab32	Rgs11	Dok1	Tinag	Plcb3	Crip3
Itgb6	Evx1	Akr1b7	Megf11	Slc2a3	AU022751
Rsph3b	Cst11	Nhs	Colec10	Gxylt2	Edar
3110070M22Rik	Lhcgr	Adamts7	Chrm2	Aldh3b1	Sh2d4a
Hmgcll1	Dppa3-ps	Spsb1	Myom1	Clcn2	Tbc1d25
Sall1	Rrn3	Hyou1	Ncam2	Rhox7a	Slc4a3
Gm26523	Nuak2	Npr3	Hsd17b7	Mlxipl	Fkbp6
1700030F04Rik	Slc4a11	Svil	Cpn1	Slc25a18	Rtl4
C1qb	Gm41	Etl4	Nlgn3	Ddx10	Nebl
Hoxd12	Nkd2	Spic	Nrp2	Isx	Sybu
Asphd2	Etv4	Adrb1	Oxtr	BC030867	Kif1a
Fxyd2	NA	Twist1	Plod2	Kcng1	Myh11
Rai2	Caskin1	Itgb5	Dpp4	Ndrg1	Cth
Vat1l	Gm10244	9530052E02Rik	B230219D22Rik	Serpinb6a	Npc1
Tmem72	Actr3b	Vegfd	Zeb2	Bid	Ido2
Dpp6	Olfr316	Pdlim3	Dpysl5	Akr1c14	Elf3
Tmed6	Fgf9	Sstr4	Pgf	Klhl32	Sh3bgr
Gm8116	Hfm1	Fabp3	Insc	Hadhb	Ppfia4
Gypa	Fam20a	Nr2f2	Fignl2	Plxnc1	Rex2
Col22a1	Iqch	Scd2	Plvap	Taf5	Llgl2
Plcb1	Mfge8	Adam12	Sorcs3	Dusp4	Meioc
Gm10718	Gm867	Neto2	Irx2	Gls2	Cln3
Zfpm1	Reep2	Mkx	Tagln3	Pnpla2	Amn
Sbspon	6030408B16Rik	Gm13441	Scn3a	Esrp1	Nipsnap1
Fsd1	Rpl34	Slc45a3	Stmn4	Mageb16	Rhpn2
D030062O11Rik	Entpd5	Gm26578	Rcsd1	Hspa4	Angel1
Dusp18	Zfp264	2600014E21Rik	Tmeff2	Acaa2	H19
Gm26903	Ncapd2	Tpcn1	Ptprn	Cd320	Ndrg4
C5ar1	Gm17067	Endod1	Mapk1ip1l	Trim7	Slc7a4
Grb10	Sycp2	Fam111a	5730596B20Rik	Oit3	Sfxn3
Klk8	Ccdc152	Entpd5	Cdh8	Fmr1nb	Foxh1
Pantr2	Pnldc1	Col13a1	F13a1	Cdk5rap1	Slco5a1
AA986860	Nphs1os	Cdc42se1	Tmem169	Ggct	Car3
Spock3	Prr19	H2afx	Map3k21	Wt1os	Kifc2
Kcnmb4os1	Rbm45	Bdh1	Des	Haao	Gal3st3
Apom	Zfp819	Arhgef26	Tenm2	Gm37422	A930037H05Rik
H2-Bl	Nlrp4e	Itih5	Etl4	BC048679	Tmem37
Igsf5	Ube2t	Tmc7	Peli2	Akap1	Klhl32
Agrn	Pnmt	Ankmy1	Slc18a3	Rgn	Siah1b
Sprr2d	Rpl35a	Aldh1a7	Chrna3	Hps3	Gm43909
Apbb1	EU599041	Mybl1	Frmpd4	Ttyh1	Mapkapk3
Pgm5	Kcnma1	Ghr	Zmiz1os1	Msh6	Mov10l1
Col26a1	Bdh1	Reep2	Hk3	4930550L24Rik	Pbx3
Sdc2	St3gal5	Nfe2	Car4	Dmc1	Parvb
Msr1	Slc37a1	Trim32	Nrcam	Zswim1	Alpl
Syt16	Tnnc1	Shbg	Ddah2	Cox6b2	Mtr
Gm21738	Pmaip1	S100a11	Marcks	Gm8730	Qsox1
Prtn3	Slco4a1	Atp2a3	Zcchc12	Pex7	Mmp23
Gm10801	Lhx1	Gm16029	Adamts3	Tuba1c	Apc2
Sfrp1	Gramd1b	Dlgap1	B130024G19Rik	Rrn3	Csrnp3
9330154J02Rik	Got1l1	Ndnf	Ska2	Xlr3c	Il10rb
Cntfr	Shmt1	Eepd1	Kif5c	Tpst2	Parp9
Slc35e4	Pax6	Adgrg1	Stab1	Gm20406	Gabra4
Cd83	Scara5	Gm9748	Mpp2	Setd6	Grip1
Limd2	Myh14	Ppp1r3c	Zfp804a	Acot3	Slc35f2
Fhl1	Rasd2	Sec24d	Csrp1	Gtse1	Prtg
Cblc	Cst8	Slc40a1	Cldn34c1	Btbd11	Trim6
Tmem132d	Gm5868	Emilin3	Glb1l2	Serpina3a	Fam131a
Astn2	Rps4l	Hspa5	Epor	Kcnd2	Hormad2
Actn3	Ahsg	Cnn2	Wfdc15b	Smad2	Cc2d1b
Gm12312	Rhox2h	Socs2	Scn3b	Lef1	Fam163a
Fgd2	Ero1lb	Islr	Scin	Gm28959	Fam98c
Gm42557	F930015N05Rik	Gm38336	Flrt2	Polg	Inpp5f
Ccr1	Tnfrsf12a	Pitpnm2	Slc39a8	Atg14	Fam178b
Gm13187	Gm2044	Ddit4l	Spta1	Tsku	Igf1
Nrep	Ppt1	Tnfaip6	Slitrk2	Phf13	Ildr2
Arhgap36	Trpa1	Plxnc1	Thsd4	Pla2g4e	Tfcp2l1
Rcan2	Fam114a1	Cst11	Amotl2	Anxa4	Tpst2
Ctse	Zfp534	Hdhd5	Klhl4	Msx2	Slc17a9
Gpr85	Gm3636	Grk5	Ralyl	Prmt7	Npdc1
Rnf43	Adcy9	Nhsl2	Shisa3	Ybx2	Amhr2
Fzd7	Usp26	Acsbg1	Hgf	Dym	Sox2
Sry	Otoa	Maged1	D030025E07Rik	Rfx2	Slain1
Nudt10	Fbxo32	Rab31	Insm2	Mnd1	Best1
BC051226	Wfdc6a	Col15a1	Col1a1	2010300C02Rik	Ubash3a
Samsn1	Sox8	Gm20421	Ly6a	Aifm3	Mael
Pnliprp2	Rab3b	Emilin1	Ebf2	Ccdc152	Adamts17
Ednrb	Vdr	Nudt19	Smad9	Slc23a2	Rasgrp4
Bdh2	Gm23849	8030451A03Rik	Nr2f2	Serinc3	Oasl2
Celsr1	Zim3	Rin3	Ndufa4l2	Serpinb1a	Lyrm7
Dab2	Mageb16	Olig1	Vat1l	Helb	Gjb5
Zfhx3	Gm14344	Hist1h1c	Tmem47	Nefh	Syt5
Ncs1	Cnpy1	Hoxd8	Mrc1	Thnsl1	Adk
Pdgfrb	Pltp	Tgfb1	Cpb2	Ifnar1	Slc5a6
Lamc2	Rpl39l	Wnt5a	Fosl2	Atf7ip2	Zdhhc18
Gm11168	Tex2	Bves	Lrp12	AU015836	Kcnd1
Pkia	Inha	Gabra1	Npr3	Coprs	Myo5c
Pnlip	Fancd2	Mme	Kirrel3	Kcnip1	Gm10704
Fam107b	Rhox2a	Sema3d	Gm11412	Otop1	Pfas
Gm3376	Myadm	Kdelr2	Slc35f1	Tex101	Hormad1
Asb9	Trpm5	Gulp1	Hoxc4	Tcea3	Tshz1
AI467606	Gml2	Cxxc5	Serpine2	Rab6b	Map7d2
S1pr3	Vars	Btn2a2	Fam105a	Fgd1	Hfm1
Galnt14	Pknox2	Maff	Olfm2	Atp5g1	Pkp2
Cpt1c	Pml	Serp1	Rai2	Ppm1j	Abcd1
Nrxn1	Efhd2	Cobll1	Arnt2	Aldh2	Tmie
Slit3	Ucp2	Rhbdf1	Scarf2	Slc5a10	Rps6ka3
Sult1d1	Tcf23	Lrrc32	Sall2	Gm12743	Susd2
Ripk3	Rhox9	Tsku	Kcnj2	Plbd1	Plcb3
Gipc2	Htr6	Cplx2	Hif3a	Pfas	Tspyl5
Pde3a	Plk3	Ralgps2	Cd24a	Dnajc21	Pfkfb4
Ttll11	Zic3	Mtus1	Zdhhc15	Rtn4rl1	Got1l1
Gata5	Npffr1	Foxc2	Tenm3	Trip10	Gm12150
Laptm5	Klf5	Tpm4	Elmod1	Tceal6	Osbpl6
Foxi1	Ifi27	Adamtsl3	Cwc22	Tex30	Rundc3b
Trmt61b	Gm15262	Ramp2	Gdf2	Rhox7b	Tmem141
Sphkap	Tdrd12	Ssfa2	Tcerg1l	Pdyn	Jade3
Cldn19	Slc38a5	Gm42836	Cux1	Hoxd10	Baiap3
Arhgdib	Gdf15	Slfn9	Mfhas1	Acacb	Pla2r1
Adam22	Plekhg4	Sgip1	Cobll1	Pkp2	Slc4a8
Gm16183	Itgb7	Fkbp14	Stmn2	Bag3	Kyat3
Rem2	Dynlt1	Vasn	Atp1a3	Fam81a	Sms
H2afy2	Atp5g1	4921507P07Rik	Arhgap28	Xlr4a	Tmem206
Vopp1	Pcdhgc4	Gpm6a	Trmt61b	Pecam1	Abca8b
Gm2065	Il11ra1	Lpl	Zmat4	Plekhf2	9930014A18Rik
Gas1	Hspa4	Gm11837	Fcrls	Rnf149	Slc37a2
Cx3cr1	Zfp936	Sncaip	Gm17276	Zmym1	Lad1
Anks1b	Dnmt3c	Pcdhgb7	Syt1	Morc1	Gclc
Cd53	Sema4a	Zeb2	Samd14	Il11ra1	Snap91
Baiap2l2	Slc13a2os	Glp2r	Col3a1	Gm14513	Dlgap4
Golt1b	Zfp981	Erbb4	Tpm4	Nars2	Gm20531
G630016G05Rik	Kcne1l	Fbln5	Tpbg	Dtnb	1190002N15Rik
Grm4	Tmem52	Pofut2	Fli1	Glrx	Nsg1
Zfp503	Rasd1	Gm26586	Hip1	Mtcl1	B4galnt4
Dact3	Iars2	Ldlrap1	Abracl	Tprn	Atp1b1
Khdrbs2	Rfwd3	Ly6e	Dhcr24	Klhl21	Pecam1
Faxc	Tmem200b	Cd55	Spry3	Dynlt1	Prrx2
Rab39b	Sorbs3	Ajap1	Arl5b	Rif1	Pced1b
Hpgds	Dgke	Scrn2	P4ha3	Sohlh1	Slc4a11
Kctd15	Gls2	Tuba1a	Bcl2l11	Nabp1	Boc
Cyth4	Pdp1	Pxdc1	Lbh	Prdx3	Grin2d
Irf6	Tmem117	Col11a1	Clcn5	Stambpl1	Fam20c
Pde1b	Gtse1	Calr	Amotl1	Zfp296	Mettl24
Nxpe3	Egr4	Tmod3	Dusp8	Mfge8	Piwil2
Mettl7a1	Fgf13	Nrarp	Gm29430	Clca3a1	Atp13a3
Myh10	Fam198b	Mpzl2	Tro	Kitl	BC039771
4930538E20Rik	Plekhs1	Anxa5	Lpp	Slc7a4	Pygb
Pkhd1	Cbx7	Pappa	Kctd15	Utp4	Plxna2
Anks4b	Mc4r	Ptp4a3	Lcp1	Parp1	Fig4
Zfhx4	C1qtnf7	Gm26840	Setbp1	Slc5a5	Met
Ptger4	Tmem198	Acta2	Ccser1	Slc28a1	Numb
Edn3	Cdc42se2	Sema6c	Astn2	Glis3	Tmem191c
Clic6	2410017I17Rik	Depdc1b	Stk32b	Mrpl15	Sgms2
Gm16070	Tmem181c-ps	Taok3	Lifr	Elmo1	Tbc1d4
Gm28444	Mafk	Mfge8	Rab39b	Fhl4	Abcd4
D130017N08Rik	Chka	Lmf1	Nespas	Frat2	Lin28b
B3gnt5	Gm6750	Shcbp1	Pcsk1n	Tnip1	Lonrf2
Sept4	Kctd18	Traf3ip2	Kcnq5	Pilra	Slc2a5
Ddc	Atad2	Msi1	Cx3cr1	Pacsin1	Cox6b2
Tinag	Lncenc1	Sox6	Fbln2	Ncmap	Syce1
Dlx5	Itgb8	Tnc	Dusp18	Ublcp1	Pdp2
Sgsm1	Plekha6	Fam105a	Bmp3	Kcnc4	Gm16054
Thy1	Axl	Shisa2	Ripply3	Armc8	Gm27483
Chst11	Fer1l4	Dusp4	Zfp697	Rims3	Gadd45b
Magt1	Znrf2	Col3a1	F2rl1	Cars2	Ly75
Cnn2	Ascl2	Vegfa	Myh10	Olig3	AC149090.1
Akr1e1	Rrs1	Chpf	Cacna2d1	Cecr2	Krtcap3
Elovl7	Fam178b	Arrb1	Nav3	Egfl6	Chst4
Sox12	Dennd1c	Gria4	Slc25a24	Gm2044	Apcdd1
Pitx1	Stk38l	Elmo1	9330154J02Rik	Psat1	Ptprg
Actg2	Gsta2	Pcolce	Id2	Ints6	Mta3
Slc16a13	Spata5	Myc	Vegfc	Soat1	Dlgap3
Notum	Atp2a3	Bcar1	Pdlim7	Gm43352	Bicdl1
Plat	Phf13	Pde9a	Pcdh17	Shtn1	Foxd1
Fam149a	Nlrp5-ps	Jup	Chd7	Dmrt3	Prrx1
Ifit2	5830432E09Rik	Gm5855	Fbn2	Pyroxd2	Tgfa
Npy	Unc13b	Adamts20	Faxc	Gsr	Atp6v0e2
Efna4	Hat1	Kdm7a	Plce1	Pde4a	Arhgap4
Hoxb9	Apobec2	Pdgfb	Gm17711	Slc25a33	Klhl13
Mfhas1	Abcc2	Cers6	Tgfbr1	Cisd3	Tnip1
Dmrt2	Gpr182	Rgs16	Dusp26	Tdrd1	Rhox5
Gm18860	Slc35d3	Spin4	Pcdh10	Pecr	6330403K07Rik
Gm16567	Piwil1	Myo1a	Adamtsl4	Uap1l1	Ube2l6
Slc17a4	Svil	Zfp9	Cxadr	Selenbp1	E130308A19Rik
Dzip1	Unc5a	Thra	Fbxl7	Pdk3	Epn3
Apela	Mageb10-ps	Trio	Mef2c	Naip5	Myb
Dpp10	4933416C03Rik	Cdh23	5330434G04Rik	Pxmp2	Epx
Vav1	Hist1h2bc	Mc4r	Ocln	Ccnb1ip1	Hexb
Ifi202b	Zfpm2	Gm38287	Vgll3	Gm14443	Arid3b
Gm10722	Ttyh1	Nabp1	Lims2	Nqo1	Tmem131l
Rassf9	Btbd18	Fam84a	Zfp691	Cul2	Wdr6
Kcnn4	Gm12958	Bmp7	Gm16596	Srsf12	Slc5a5
Bcl7a	Nlrp14	Pde5a	Piezo2	Icam5	Gnaz
Lsamp	Mme	Rgn	Atoh8	AC149090.1	Krt18
Pantr1	E030030I06Rik	Abracl	Synpo2	Pml	Slc1a6
Gm38708	Mis18bp1	Frem1	Sh3rf1	Dnaja3	Dnah1
Vangl2	Tox2	H6pd	Elk3	Pygm	Sema4g
Pde10a	Serpinb6a	Tmcc3	Cped1	Sdc4	Klf11
Myadml2os	Mybph	Dse	App	Matn2	Cdk16
Megf11	Dmp1	Arhgef40	Akr1c19	Vdr	Tfe3
Tlx2	Sil1	2010300C02Rik	Slc2a13	Tescl	Fhl1
Dlx2	Pcgf5	Rem1	Fgf10	C1ra	Osbpl3
Cys1	Gm25767	Peli2	Gm20467	Upk2	Bcam
Soga3	Sytl3	Nes	Rragd	Slc41a3	Prkag2
Gm27204	Gstm3	Ell2	Adra2a	Gm20731	4931440J10Rik
Prr36	Ppp1r1b	Ncald	C1qb	Dut	Zrsr2
Gm43198	Rif1	Pgp	Gm26672	Wdr72	Crabp2
Mfsd6l	Gm15261	Itm2a	Pde6h	Ephx2	Gm15540
Kcnmb4os2	Lrrc2	Itga11	Foxd3	Hebp2	Mtcl1
Gbp2b	Gm3468	Copz2	Atp2b1	Cd82	AA414768
Gm16559	Cacna2d2	Gas2l3	Kcnmb4	Afg3l2	Kcnab1
Rrad	Rab35	Prr11	Gm3739	Acss1	Sycp3
Prkg2	Il17rb	2610507I01Rik	Cpeb4	Zfp667	Cep164
Gm15063	Slc25a33	Nav1	Pclaf	Derl3	Gm4779
C1qc	Mst1r	AI593442	Pi16	Aard	Ap3b2
Tpm2	Pdpn	Aaed1	Hpgds	Usp43	Fam169a
Gm12258	Sgk3	Junb	Kcnt2	Cfap161	Rnf17
Tram1l1	Hes5	Cbfa2t3	Slitrk5	Kcnq1	Pla2g16
Slc2a2	Gm11747	Ackr3	Ptprb	Crip3	Adam22
1810041L15Rik	Pnkd	Hgf	Gm26586	Rcl1	Nanog
9930014A18Rik	Tapbp	B130024G19Rik	Sema6a	Rnf125	Tspan12
Hk3	Grhpr	Sox13	Agtr2	Whamm	Gpcpd1
Vwa2	Nppc	Slc52a3	Maml2	Angptl4	B230398E01Rik
Meox1	Gm13068	Tcf19	Pcdh8	Exosc5	Adgre5
Slc44a4	Phf8	Acvr1	Mex3a	Ipmk	Tcea3
Amph	Wsb2-ps	Zfp423	Plekho1	D11Wsu47e	Enpp2
Amotl2	Cdc7	Akr1cl	Pdlim5	Sfxn3	Bmpr1b
Ncf4	Ell2	Fam198b	Stom	Plxna4os3	Cpne5
Kcnmb4	Irf1	Marcks	Dnajb5	Ptpn22	Slc25a20
Pik3r1	Cebpa	Piezo1	Akap12	Stk17b	Tob1
Thbs2	Smtn	Dnajc12	Adamts12	E330013P04Rik	Pls1
Slc22a6	Cpt1a	Timp3	Lum	Ctps2	D230025D16Rik
Enho	2600014E21Rik	Cdk1	Armcx4	Pold1	Wt1
Camk2n1	Aqp5	Ptger1	Crp	Tdp2	Btbd11
Got2-ps1	Tspan5	Gramd1b	Fam171b	Srbd1	Hadhb
Ppp1r1a	Nrg1	Dlc1	Sgsm1	3110001I22Rik	Doc2b
Ret	Zbtb46	Paqr8	Irs2	Ncoa4	Lpcat4
Fign	Gm42517	Sox7	Stra6	Cops7a	Acadl
Scly	Spint2	Gm15419	Fzd8	Gm16048	Nup210
Celf4	Hesx1	St3gal5	Tmem200b	Scarb1	Wdr44
Tspoap1	Aldh7a1	Dact3	Agrn	Kif18a	Pla2g10
Tfap2a	Naa11	Prickle2	Celf4	Spidr	Rad51d
Gm43539	Ero1l	Dlk1	Plpp4	Gm826	Lonrf1
Shank1	Sparc	Scarf2	Arhgap20	Mir6357	Lrrc42
Gm16000	Zfp978	Hipk2	Has2os	Rhebl1	Rab11fip2
Efnb3	Rhox7b	Prrc1	5730559C18Rik	Pqlc1	Esr1
Hotairm1	Smoc1	Gna13	Gm11491	Gm8909	Gm47283
Pag1	Rec114	Ptn	Hoxa2	BC034090	Wfs1
Tmem132a	Kcna7	Pdia6	Tmem132e	Fam98c	Pdcd4
Cttnbp2	D030056L22Rik	Gpr20	Trim36	Nmrk1	Letmd1
Rtl3	Arap2	Ier2	Adamts6	Rad50	Lgr4
Hey2	Rad54b	Olfml1	Grik4	Naaa	Zfp385b
Notumos	Grasp	Iffo2	A530084C06Rik	Cct2	Hccs
Adamts3	Zglp1	Slc35a2	Efnb3	Optn	Ern1
Rnase4	Rad18	P4ha3	8030451A03Rik	Nfatc2ip	Mylip
Prr16	Haus7	G6pdx	Eif4e3	Greb1l	Serpini1
Tmtc4	Gm14719	Pdia4	Ror2	B3gnt7	Cnnm2
Ms4a6c	Shtn1	Loxl3	Mmgt1	Rhox2g	Cds1
Ggt1	Dcaf4	Pdia3	Dchs1	Gatsl3	Tgif2
Abcg5	Aunip	Rrs1	Mc2r	Kit	Atp2b3
C1qa	Gm826	Vim	Cabp1	Prr23a3	Apobec3
Hcls1	Trib2	Aurkb	Zfp629	Scgn	Ddx19b
Fcgr3	L1td1	Pkn1	Cadps2	Nt5c3	Mycn
Lsp1	Epp13	Whrn	Ighm	Slc37a2	Efna1
Vash2	Cst13	Trib1	Hs3st6	Uba1	Cpeb2
4930412O13Rik	Efcab10	Gne	Ltbp1	Gpat3	Timm8a1
Chrdl1	Fxyd6	Hist1h4d	Prrg1	Srp9	Pcdh7
Plekho1	Gm27191	Ngfr	Vldlr	Fbxl5	Sema5b
Adgra2	Gm20406	Haus7	Cyth4	Pkig	Epb41l3
D630045J12Rik	Utp4	Gm44335	Artn	Dctpp1	Acadvl
Spdya	Tpd52l1	Megf6	B4galnt1	Rilp	Bcas3
Pld4	Plekhf2	Dcn	Penk	Gm15873	Srsf12
Hmgb1-ps3	Radil	Tcn2	Ms4a6c	Cox7a1	Cpt1c
Adra2a	Rhbdf2	Sgk3	Ehbp1l1	Echdc2	Lrrk2
Slc7a8	Fam184b	Xbp1	5930403N24Rik	Grn	Rnf31
Olfm1	Cst12	Racgap1	Jph2	Bicdl1	Grina
Prr15l	1700061G19Rik	Car12	Gabra3	Gm17035	Cisd3
Gng7	Rhox2c	Sertad4	Ptprk	Ubxn2b	Dopey2
Tnfrsf14	Pald1	Ispd	Hmgn3	Grsf1	Plekhh1
Ap1s2	Gm8113	Fkbp7	Ctnna2	Gm7972	Rims3
Ppl	Grk5	Akna	Lama2	Arrdc4	B4galt6
1700006J14Rik	Serpina3b	Cmtm7	Mpeg1	Nmur2	3110002H16Rik
Gng8	Slc30a2	Sulf2	Baiap2l2	Tex19.2	Rhbdl3
Slc18a1	Greb1l	Ppfibp1	Hykk	Magi1	Ybx2
Kcnq4	Rin3	Sort1	Col26a1	Mir293	Scpep1
2610301B20Rik	Pou2f3	Aqp5	Vmn2r22	Prmt3	Gm16933
Hoga1	Vcp	Phldb1	Cecr6	Mpp1	Nqo1
Igf2os	Zcwpw1	Col6a1	Casd1	Dgcr8	Rasl11a
Syt4	Fam234a	Hes1	Kctd12	NA	Mfsd4b4
Clcn5	Scube2	Ppfibp2	Shkbp1	Hadha	Phka1
Gm47283	Zfp667	Tmem260	Slc7a8	Steap3	Acaa2
Zswim6	Tpd52	Pja1	Tbx3os1	Gm340	Uba1
Cux1	Gm2381	Zmiz1	Sulf2	Cilp2	Slc16a1
Kcnj14	Zfp987	Lfng	Rbm24	Acy1	Rbm44
Gm37194	Khdc1a	Ankrd44	Kcnmb4os2	Aldh7a1	Kat2b
Lrrc7	Ublcp1	Cdc42se2	Csrp2	Sin3b	Sparcl1
Ccdc85c	Shcbp1l	Ikbip	Mab21l1	Rmdn2	Tm7sf3
Tle3	Slco4c1	Hspg2	Arrb1	Itpr2	Zfpm1
Nradd	Mpp6	Rasgrp3	Astn1	Gm14261	Fgd6
Abhd11os	Cbs	Gm15459	Trp53inp2	Ostf1	Gsdmd
A530084C06Rik	Sycp3	3632451O06Rik	Prrxl1	Mtmr14	Prkcz
Gm30085	Cdh17	4933431K23Rik	Lrrc7	Gjb5	Pdgfc
Gdf6	Pde8a	Gpx7	Zik1	Mei4	Zfp462
Trim5	Scml2	Tmem200a	Mmp2	Kat7	Nid2
Alox12b	Sct	Hjurp	Itga9	Tnxb	C77080
Kif5c	BC030867	Il4ra	Tmem132d	Egln3	Cul4b
Msrb3	Arntl2	Cyp1b1	Zfp354c	Fzd5	Etfbkmt
Slc4a8	Msrb2	Tmem185b	Wnt11	Dcaf13	Dixdc1
Ptprk	Poli	Serpinb9	Tram1l1	Zfp990	Angptl4
Gm7292	Btn1a1	P3h4	Me3	Rad18	Ina
Kalrn	Lpcat2	Prr5	Lrrn3	Kat2a	Gm10324
Marcksl1	Hormad2	Tns2	Rspo2	AW551984	Idua
Nrcam	Slc5a11	Col6a2	Ncf4	Mrpl48-ps	Aldh2
Tm7sf2	Dyrk3	Fyn	Gm15663	Chp2	Plekha5
Gria1	Gm19461	Reep3	Sp6	Wdr75	Syne4
Il33	Slc25a48	Prnp	Kcnj14	A430005L14Rik	Dazl
Dcx	Rpa2	Hsp90b1	Zfhx3	Fpgs	Zfp280c
Lrrc4c	Caprin2	Ltbp4	Gm34030	Zdhhc18	Stk31
Speg	Steap3	Ptgr1	Lmo4	Kifc3	Pls3
Sc5d	Ggct	Lox	Rassf9	Psors1c2	Dpf3
Gm26568	Nupl1	P4ha1	Ranbp6	Emilin3	Sgpp1
Adam11	Vegfa	Chst2	Kcns3	Myh13	Pld2
Acat2	Fgl1	Fkbp1a	Zfp423	Flcn	Trmt2b
Tfcp2l1	Gm8909	Spc25	Mdk	Hspa8	Gdf3
Rasl10b	Ifitm3	Bnip2	Dlg2	Arid3b	Zfp990
Slit1	Dmc1	Syn3	Negr1	Ina	Mrm1
Spsb4	Kcnk2	1810037I17Rik	Dkk3	Vcp	F11r
Gm15929	Trim37	Gm26825	Golim4	Mrm1	Slc9a3r1
Stab1	4933402E13Rik	Birc5	Ripk3	4933402E13Rik	Abhd11
Negr1	Myo10	Col1a2	Kcna3	Rpl10l	Hacl1
Tmem37	Bub1	Troap	Cldn7	Fkbp9	Rnf182
Vmn2r22	Gm9347	Zfp36	Klhl30	Kcng3	Gm19553
Hand2	Jakmip1	Atp6v0e	5033428I22Rik	Shisa8	6030419C18Rik
Fam163a	Tet1	Gfra2	Gm28876	Slc7a5	Helb
Gc	Msh6	Rimbp2	Rhobtb3	Rorc	Gm20731
Phf21b	Hs3st2	Aagab	Kcnmb2	Krt222	Klf7
Fam171b	Esrp1	Cdc42ep2	Itpripl2	Nphs1	Rph3al
Actc1	Junb	Selenom	Trim2	Carnmt1	Engase
Ndst4	Gm9768	Odc1	Peg10	Zfp146	Hadha
Ly86	Gm20684	Ephb6	Cdh12	Dars2	Lhx9
Atp2b1	Map3k21	Tmem86a	Prps2	EU599041	Irf5
Ovol1	Plk5	Hmga2	Trpv2	Edn2	Plp2
Sema4f	Syt15	Ncam1	Heph	Ctnnal1	Zfp672
Kcnab1	Arhgap6	Vsig10	Grid1	Gtpbp4	Tns3
Gria3	Spata25	Nell1	Klhl31	Epb41l4a	Vav2
Csrp2	Acan	Pdlim2	Lhx6	Ttll12	Nmt2
Antxr1	Kcnk3	Slc4a2	Cryab	Urb1	Fbxo31
Gm11149	Polg	Gucy1a1	Myc	Rbpms2	Ttl
Kcna3	Glp2r	Arhgap20	Dpp6	Pced1b	Pacsin2
Ptgir	C7	Cttn	Mex3b	1110004E09Rik
Ighm	Pla2g10	Manf	Psrc1	Iah1
Gm12355	Sema7a	Rnf144a	Gabra1	Samhd1
Rab17	Dag1	Cd200	Ptgfr	Gm13068
4930412C18Rik	Gm21411	Dab2ip	Ntsr1	Klhl23
Tead2	Fut10	Tubb6	Anxa3	Tmem184a
Ctsc	Gm6798	Ckap4	Gm7862	Tpd52
Phox2b	Hook1	Cyp2s1	Tle3	Gamt
Prdm16	Htra3	Adprh	Gm12407	Rtkn2
Dchs1	Ppm1j	Spp1	Pld4	Pot1a
Dsc2	Rab27a	Epha4	Inafm2	Kcnip2
Nrip1	Sec14l4	Hspa1b	Mcam	Gm37297
Phlda2	Gm27194	Sin3b	Ms4a6d	Kdm3a
Ppwd1	Hspa4l	Unc5b	Dtna	Col16a1
Rpl34-ps1	Epx	Mxra7	Fam168a	Gm20531
D330041H03Rik	Zwilch	Lmo4	Scx	Gm12940
Mmp14	Col6a3	Fndc3b	Tmem72	Cox18
Hemk1	Gm8091	Tspan9	Scd1	Gm45765
Cgref1	St5	Zdhhc2	Lpar4	Mkx
Ppm1h	Mafa	Arhgef4	Epha8	D130058E05Rik
Nsg1	Scarb2	Tef	Clec14a	Vps26a
Fgfr1	Cenpf	Capn6	Cys1	Wdr62
Gm16401	Ppp1r1c	Ddias	Limd2	Lgals9
S100a16	Zfp97	Bzw2	Gypa	1700007K13Rik
Mrgpre	Usp28	Nrep	Sgip1	Npc1
Rab36	Evx1os	Tmem64	Jun	Gm21992
Scpep1	Sntb2	Plk3	B230104I21Rik	Gclm
Tox3	Rgcc	Cep128	Gm16599	Akr1b8
Kcnj8	Bgn	Chka	Mrgpre	Vgll2
Gm4735	mt-Nd3	Gm36569	Cd40	Gm15893
Trim2	C1qtnf1	Atp7a	Tlr13	Slc1a6
Bcl9	Ttc39b	Proser2	Pigm	Hoxd9
Tnfrsf11a	Rbpms2	Slc25a10	Gnao1	C1qtnf4
Lrrc75b	Mei4	Lasp1	Arhgef10l	Wdr36
Hacd4	Myh7	Cd38	Gm16277	Cercam
Cabp1	Cep85	Impa1	Slc17a4	Snapc1
Cux2	Ces2g	Ucp2	Cntnap3	Lyrm7
Lin7c	Gm13441	Hs6st2	Fbn1	Rnf31
Hunk	Fam189a1	Lifr	Megf9	Oip5
Smad9	Atr	Creb3l2	Tet3	Clip4
Qprt	Rims4	Tmem255a	Pdzrn4	Pm20d2
Crb2	Dusp6	Dnajb11	Disp2	Cdx1
Aprt	Tprn	Plekhg1	Tmem136	Krt20
Svep1	Gm13031	Casp7	Sptb	Gsdmd
Sox11	Exd1	Cycs	Itgbl1	Dnajc15
Ms4a6b	Eepd1	Pear1	Smtnl2	Rsad2
Gm37509	Gm9		Ndst1	Wdr44
Tns4	Whamm		Pgm5	Sphk1
Klhl7	Etd		Gria1	Exd1
Ankrd13b	Traf3ip2		Gm13256	5330438D12Rik
Lims2	Acvr1c		Eya1	Ephb1
Mab21l2	Nudt19		Fgf5	Klhl5
Ctnnd2	Gm45537		Peg3	Gm3143
Adra2c	Scap		Gm13179	Dnaaf3
Col23a1	Bmp8a		Gpc5	Gjb4
Hnf1aos1	Rap1gap		Lrp6	Gramd2
Rab38	Mphosph6		Muc1	Gclc
Selenow	Syt9		Skida1	Mdn1
Gm16140	Slc27a1		Galnt14	Tacr3
Gm13111	Glt1d1		Npbwr1	Rabac1
Gabra3	Ngef		Steap4	Shb
C130012C08Rik	Pdk1		Gxylt1	Bard1
Gm6223	Gm11946		Art4	Msh2
Gm20508	Vegfd		Gm42557	Ngfr
Unc5c	Trak1		Epha7	Trim37
Eno1b	Adamts7		Bdnf	Gldn
Mpeg1	Gm16365		Kcnmb4os1	Slc22a18
Rhoq	Gm43023		Cplx2	Pla2g5
Sh3gl3	Mep1b		Shox2	Spa17
Dkk2	Dym		Tpm1	Dars
Hoxa1	Mylk		Rhoq	A930037H05Rik
Gja3	Entpd2		Apom	Fancd2
Pitpnm1	Gm27820		Erbb4	Chdh
Ccdc151	Gramd2		Col8a2	Ptpn4
Gm28151	Frmpd1		Ebf1	4930461G14Rik
4833420G17Rik	Rhox2g		Tm4sf1	Nup133
1700052K11Rik	Ckb		Gm10493	Dmrtc2
Pcbd1	Ptch2		Thy1	Cdk16
Gm17396	Plekha4		Spin4	Nlrp14
Ccdc136	Galnt10		Arhgap33	Baz2a
Wnt9a	Wdr36		Ampd3	Mpp6
Slc25a37	Etv1		Fzd7	Rap1gap
Mapk12	4933416M07Rik		Fam111a	Trim25
Gm26735	Acsl1		Luzp1	Ctps
Gria2	Xpot		Olfml1	Spata21
Ascl1	Itga9		Slc6a4	Prmt9
Abca3	Myo18a		Adamts9	Npr1
Trpv4	Derl3		Fam199x	Trim24
Pbxip1	2600006K01Rik		Epyc	Cdh23
Slc15a3	Gm37913		Dach1	Pde8a
Slc22a8	Tmco4		Uhmk1	Zfp936
Fcer1g	Morn2		Hotairm1	Ccnh
Glrb	Pnmal2		Emcn	Pgap2
Shkbp1	Chdh		4930503L19Rik	Ppp3cc
Corin	Fbxo47		Veph1	Tapbp
Met	Ube2l6		Ctgf	Naa16
Shh	Boll		Grin3a	St6galnac2
Pcna-ps2	Ttc39c		Draxin	Hs6st1
Tcp11l1	Ncapd3		Hnf1a	Platr14
Apcdd1	B230322F03Rik		Pcdhb18	Olfm1
Cyp7b1	Stambpl1		Dnmt3a	Fcho1
Kctd1	Nlrp12		Ptchd1	0610039K10Rik
Mpp2	Mtr		Mecomos	Mrpl23
Pdzk1	Cecr2		Hspa12a	Hs3st1
Fstl1	Tmem63a		Eya2	Clstn3
Mgat3	Sox13		Gm43198	Tgm3
Gm16596	Vdac3		Tshz3	Tspan5
Ambp	Lancl3		Epas1	Jak1
Bcam	Jak3		Rarg	Gm9768
Rtl5	Gm17039		Scg2	Rnf182
Frmd4a	Slc7a2		Msr1	Aes
Gm45371	Pnpla2		Pitpnm1	Tars2
Cxadr	Ncoa1		Junos	Adgre5
Lrfn4	Gm11413		St8sia4	Stk24
Tmsb4x	Ier3		Pirt	Bckdha
Nfam1	Irgm1		Fjx1	Dnah8
Shank2	Gm2670		Mfap2	Acadvl
Gdpd1	Tst		Dse	Kcnj12
Tmem267	Slc25a18		Gm16136	Plp2
E330013P04Rik	Ubash3a		Gc	2900005J15Rik
Slc35g2	Tarsl2		Ccdc40	Gm45716
Rtl8c	1700016F12Rik		Serpina3g	Gm14790
Mkrn2os	Pdlim1		Sv2a	Sema4d
Ly6h	Rhox1		Tnfrsf11a	Bcap31
Setbp1	Optn		Ttbk2	Rab11fip5
Jun	Npr1		Itm2a	Ppat
Mfsd6	Glis3		Adcy8	Hspa4l
Kremen2	Rdh7		Trim5	Spx
Fam78b	Gm14058		Zfp512b	Nxf3
Misp	Hk1		Lrrc8b	Cpt2
Fndc4	Cry1		Col9a3	Cenpi
BC025446	Nol8		Grem1	Lhcgr
Cd14	Mup6		Ust	Gpr160
Mal	Pianp		Manea	Ube2s
Hand1	G2e3		Pea15a	Pde8b
Epb41l1	Lrrc32		Zim1	Zcchc10
2900076A07Rik	Camsap3		Gm38287	Wdr89
Epha3	Tex30		Fcer1g	Trmt11
Arhgef10l	Kcnk12		Fas	Tshr
Chn2	Gpc4		Entpd1	Riox2
Adgre1	Mylk2		Hck	Slc25a39
Adamts20	Aspn		Keg1	Gm9
Gpc5	Tdrd1		Gja4	Dhtkd1
Emx2	Mir9-3hg		Thbs4	1700019D03Rik
Adcy8	Pyroxd2		Zfp760	Meltf
Gpr17	2610203C22Rik		Dll3	Slc41a2
Gm12108	Gm14401		St8sia2	Polg2
Col1a2	Manba		Rnf150	Cacybp
Atp2c2	Wnt5a		Gm42604	Gm37335
Ncf1	Cul4b		Nfam1	Zfp97
Ly75	Gm45714		Lrba	Chmp2a
Brinp3	Ptpn20		4931428F04Rik	Fam117a
Sptssa	Schip1		She	Syk
Add2	Egln3		Zfp862-ps	Tet1
Apol7e	A430027H14Rik		Irgq	Gm12666
Epor	Gm35986		Bex3	Ptges2
Wnt7b	Zmym1		Ptgs1	1700021F05Rik
Frmpd4	1110046J04Rik		Col13a1	Rnaseh2b
Zfp711	Abcc4		Nucks1	G0s2
Mpped2	Syt6		Ifit2	Mis18bp1
BC049730	Osgin1		G630016G05Rik	Lbhd2
Unc5b	Reep6		Nrarp	P2rx4
Podxl	Nxnl2		Rcan2	Ranbp17
Grip1	Sox3		Tfec	Nup35
Pklr	Prmt3		Hcrtr2	Zfp277
Gm9958	Hs6st1		Gja3	Espl1
Itk	Gfra2		Tspan12	Atp1b1
Mex3b	Calr4		Vcam1	Casz1
Dbndd1	Tktl2		Sh3bgrl	Fgd6
Foxp4	Egr2		Gpalpp1	Zfp750
Ap1s3	Dmgdh		Pde11a	Foxo1
Sorcs1	Bpnt1		Agps	Zfp264
Lzts1	Gm16029		Tmsb4x	Cd9
Gm9996	Rffl		Zdbf2	Dctd
Tet3	Zfy1		Slc35e4	Rasd1
C1qtnf6	Gprc5b		Impact	Fam131c
Mageh1	Nipal1		Gm27204	Morc3
4930426D05Rik	Tmc3		Gm26523	Ears2
Fgf12	Cdk5rap1		Id3	D1Pas1
Dpf3	Aifm3		Aadat	Gm26856
Sept6	Hps3		Prokr2	Stip1
Gm13736	Pdk4		Gm9885	Fars2
Pls3	Cyct		Gm13362	Palb2
Tab2	Sgol2a		Inhba	Hprt
Ror2	Sfn		Ufm1	Serpinb9b
Rassf6	Gm14139		Klhl29	Iars2
Il1rap	Myh8		Rpl34-ps1	Qsox1
Hmga1	Rad50		Shank1	Rhox2b
Snca	Terb2		Cldn19	Hccs
Hdac6	Zfp600		Gm15557	Noc2l
Scin	Gm26578		Kirrel	Myb
Wbp1	Gucy1a1		Mapk11	Nol6
Lrrc56	Gad2		Myt1	Dok7
Dnmt3a	Esr2		Gm16070	Kcnma1
Cbx1	Ephx1		Lhfpl4	Adcy3
Frem2	Dgka		Lysmd3	Vdac3
Gm37829	Mpzl2		Cxcl13	Isoc2b
Th	Pip4k2a		Gm27516	Sycp2
Kcnj2	Kpna2		Net1	Ddx19b
Casd1	Sema3g		Gm26776	Rhbdl3
4930503L19Rik	Gm19410		Kcnj10	Fdxr
Chd7	Spo11		Antxr1	Ttc39c
Plpp6	Rhou		C1qc	Pus1
Notch3	Lrrfip1		Bmpr2	6430710C18Rik
Keg1	Lipg		Gm21814	Ndfip1
Luzp1	Gtsf1		Ifi202b	Eefsec
Lrp12	Nol6		Snx24	Abraxas1
Serpina16	Hey1		Gm6505	Platr4
Tmod2	Xrcc6		Kynu	Pianp
Fam84a	Raph1		Slc38a6	Agk
Xxylt1	Slc27a3		Plcl1	Rad51
Dok3	Rab11fip1		Igf2bp1	Rras2
Taf7l	Pacsin2		Syt17	Acot9
Wfdc13	Ptp4a3		Mcc	1110046J04Rik
2610316D01Rik	Cerk		Tmc7	Pla2g12a
Ppp1r3b	Nfxl1		C2cd4b	Rasd2
Gm26507	Taf7		Kif3c	Cep164
Efcab1	Mdm2		Mn1	Rsph1
Clec14a	Xlr4b		Pcdhgb4	Acsm3
Igf2bp1	Incenp		Amot	D230025D16Rik
Penk	Snai3		Spaca6	Slbp
Srxn1	Sod3		Kcnip4	Gstcd
Arhgef37	Sidt2		Sncg	Acadm
Sncg	Ddx10		C530008M17Rik	Fgf2
Ccnj	Atp2b3		Sox11	Psmg1
Zswim5	Zdhhc23		Gm43236	4930566F21Rik
Prickle2	Ppfibp2		Kcnk9	Spata25
St6galnac3	Tmem181b-ps		Plaur	Vps50
Gm10182	Ptch1		Plet1os	Pold3
Sbk1	Gm10324		H2-K1	3110043O21Rik
Gm15545	Bcar3		Rtn2	Slc17a9
Fam69b	Parp1		H2afy2	Vps11
Tph1	Fbln7		Fzd6	Gm16170
Dtx3	Atp8b2		Trpc3	Btg3
Wrb	Timp3		2700069I18Rik	Frmpd1
Zfp760	Klhl12		Phox2a	Apoc1
Gm15975	Vipr1		Arhgap31	Herc3
Cadps2	Atp10a		Apol7d	Farsb
Slc2a4	Pold3		Adgre1	Tgfa
Ankrd6	Adamtsl2		Asb13	Taf5l
Spsb1	Gm16702		Ceacam2	Bahd1
Lrrc10b	Morc1		Nkain3	Nudc
Parva	Dtnb		Zfp275	Rffl
D430019H16Rik	Foxo1		Gm14400	Rhbdf2
Impad1	Usp9x		Gm15975	Rpl35a
Cd68	Ankrd50		Flywch2	Fkbp5
Aifm2	Cebpb		Gm13301	Pex26
Fcna	Prc1		Lmod1	Rasgrp4
Nov	Baiap2l1		Gm11532	Rad54b
Pcsk1n	Ipmk		Ppargc1a	Sec14l4
Tubb2b	Gm21992		Fgfrl1	Entpd6
Jph2	Btg3		Dcn	Ccdc92
Zfp369	Psat1		Vwa2	Gatm
Ldb2	Ralgapa2		Khdrbs2	Six1
Rab33a	Zfp345		Zfp260	4933416M07Rik
Pcdhga11	Gm1141		Slfn9	Ezh1
Gm11868	H6pd		Ccdc50	Zfp345
Homer3	Dhrs7		Wsb1	Col6a1
Fmn1	Tcf21		Gm12744	Aldoc
Gm9923	Mast2		Tab2	Hibadh
Gm11412	Atf7ip2		Fhl1	Uchl1
Veph1	Nhlrc2		Man1c1	Rec8
9130019P16Rik	Gm29292		Myl3	Chpt1
6530437J22Rik	Lpin3		Gm14403	Atg13
Gata5os	Fam169b		Ccdc3	Gm12339
Nog	Irf8		Cyp2j6	Uhrf1bp1
Grem1	Nrn1		Il1rap	Arpc1b
Lhfpl4	Adrb1		Tmem164	Actn2
Ndrg4	Hpcal1		Kdm7a	Itpka
5330434G04Rik	Rex2		Hoxc9	Pla2g4a
Cachd1	Gm53		Aldh1l2	Lamp1
2700033N17Rik	Zdhhc2		Tmtc4	Iqcb1
Ccl6	Tacc1		Dkk2	Casp6
Pde6h	2200002J24Rik		Mturn	Syap1
Pcdhgb7	Rnf19b		Tmem26	Nmd3
Hsd17b7	Nhs		Ptgir	Zfp600
Col4a6	Gm14124		Ikzf4	Nat10
Spag16	Epha2		Tshz2	Slc27a1
Tcf15	C130089K02Rik		Gdnf	Dbf4
Slitrk5	Kntc1		Cbx5	Shmt1
Ikzf2	Ppp1r15a		Gdf6	Platr17
Nlgn3	Acoxl		Emid1	Numb
Tnfrsf19	Hdhd5		Fam78b	Clybl
Sh3bgrl	Ranbp17		2700033N17Rik	Eef2kmt
Cdkl1	Gm11837		Dmtn	Trmo
Nmral1	Mocos		Zeb2os	Gm43909
Plppr3	Cilp2		Tm6sf1	Gm44260
Gm15557	Rhebl1		Impad1	Irx5
Ephb2	Nfkbiz		Pcdh9	2410017I17Rik
Fv1	Aatf		Stab2	Top3b
Mex3a	Lama4		Samsn1	Tcf23
Arhgef6	Hs6st2		Hcn1	Fam185a
Msx2	Myrip		Gfpt2	Cisd1
Fzd6	Rsph1		Ms4a6b	Tmem150a
Abcd2	Pnmal1		Masp1	Lyrm4
Gm20696	Tiam1		Tmem59l	Btbd10
Emcn	Nudt6		Tmem68	Nol9
Baz1a	Topaz1		Slc30a10	Cad
Nipsnap1	Agpat4		Sim2	Uchl3
Caps2	Snx25		Rxfp2	B3gnt9
Tfec	Otud3		Gm35065	Gm41
Klhl14	3110002H16Rik		Tnfsf15	Gm19461
Mest	Vps26a		Cldn12	Dock9
Zrsr1	Klf8		Pthlh	Nod1
2810410L24Rik	Piwil4		Slc9a9	Lactb2
Gm4409	Ctnnal1		Gm17396	Cpne5
Lrrc49	Gm15419		Dpy19l4	Dpcr1
Pdlim7	Fam19a5		Add2	Cacnb2
Klf1	Btn2a2		Tmx4	Mageb4
Pik3r3	Rab11fip5		Syndig1	Syt5
AK157302	Gja1		Gipc2	Anxa7
Trpv2	Efhc2		Rnf24	Lig1
Lor	Tnnt2		Gm28438	Slc5a6
P3h2	Gm36569		1700006J14Rik	Rnps1
Coa5	Pipox		Ptger3	March2
Bex3	Haus4		C130060K24Rik	5830432E09Rik
Hist2h2be	Slc27a6		Pantr1	Tma16
Kif3c	Kif18a		Ggt7	Rin2
Me3	Fam3c		Ret	Rasa2
Sox4	Mhrt		Snai1	1700027J19Rik
Gata1	Alg8		Adam23	Rnf130
Fibcd1	Syce2		Gm45768	Rps4x
Ptgis	Mboat2		Arhgef26	Rpl18
Podxl2	Slc9a7		Clvs2	Cnpy1
Filip1l	Msh2		Vav1	Gprc5a
Oprk1	Tmie		Ctsc	Wnt10a
Nlrc3	Relt		Afp	Pip5k1b
2610203C20Rik	Rhox6		Ghr	Slc52a3
Tek	Slc44a1		Nynrin	Esco1
5930403N24Rik	Necab1		Snn	Ogg1
Gm10717	Spire2		Prr5l	Pak6
Ypel1	Cadps		Naalad2	Zfp980
Pcbp4	Polr2b		Plekhg1	Reep6
Pcyt1b	Dhtkd1		Gng8	Igsf23
Ikzf1	Nup88		A930012L18Rik	Eef1g
Vegfc	Foxo6		Gm37676	Zfp367
Amigo2	Dusp5		Adcy4	Alkbh2
Snn	Adamts14		Hhip	Adpgk
Gm45889	Fetub		Brinp3	Adamts8
Enpp2	Serpinb9b		Epha3	Osbp2
Efna5	Trim71		Kcnab1	Qdpr
Prr5l	Tmem64		Pcdh11x	Chrm4
Aplnr	Plaa		Cuedc1	Retsat
Stk32b	Zfp640		Adgrv1	Me1
Aig1	Ppp1cc		Ldb2	Rrp15
Golm1	Fam198a		Pcdhgb6	Bpnt1
Ptgs1	Rapgef4		Arid3a	Abl2
Gm23833	Brca1		Ajuba	Efhc2
Siglecg	Zfp874a		Etv1	Tor3a
Efnb2	Gm7335		Gng2	Etfa
Xpnpep2	Ston1		Syt16	Adk
Samd10	D030047H15Rik		Pclo	Strbp
Rnf150	Ly6e		Hipk1	1190007I07Rik
Limch1	Gm13110		Klk8	Samd11
Tshz1	Heatr1		Erbin	Mcrip2
Vps37d	Gm340		Gm26751	Ints4
Alkal2	Wif1		Gm37804	Lrpprc
Gm43672	Rnps1		Rdh10	Cdkn1b
Sfxn4	Chst1		Rasgef1c	Idh3g
Fcgr1	Padi3		Cux2	Gtf2e2
Myl3	Fosb		Gm43256	Rsad1
Pdp2	Aldh1l1		Ehf	Tnni1
Eif4e3	Polr3b		Gmds	Caskin1
Myo6	Tmtc1		Ptprs	1110065P20Rik
5033428I22Rik	Cacna1h		Ano4	Rab3b
9630028H03Rik	Itpka		Hoxb8	Folr1
2210008F06Rik	Nadk		Fam83b	Gnaz
Tox	P2ry2		Gm29491	Tob1
Snx24	Itpr1		P3h2	Agtr1a
Tmem68	Cyb5r1		Sorcs1	Runx1
Gdf11	Ptpn22		Rc3h2	Epcam
Acsf2	Ubr5		Xkr5	Irf9
Neurl3	Urb2		Hivep2	Fmnl2
Acp5	Nrde2		Fgd5	Nutm1
Elovl4	Sox7		9330182L06Rik	Kpna2
Tgfb3	Deptor		Mrc2	Pdcd2
Gpr27	Urgcp		Lhfpl2	Gm38058
Pak1	Kif20b		Zkscan1	Ppan
Prune2	Nup107		Adcy6	Tdrd7
Plpp4	Gm2415		Ppwd1	Hook1
Ssc4d	Nlrc4		Serp1	Rnf19b
Psd2	Pgap2		Xxylt1	Echdc3
Stxbp4	Lrpprc		Grm3	Emx2
Dnmbp	Rbm46		Adamts5	Nfkbiz
Tmem213	Rreb1		Gm26778	Cenpf
Ager	Dgcr8		Gng7	Rpap2
Lgals3	Vwa1		Smad6	Gm37245
Igfbp4	Ush1g		Ccr1	Bcat2
5730585A16Rik	Med18		Anks1b	Rtl4
Slc5a1	Tgfbr3		Tmem158	B230208H11Rik
Mthfd2l	Pxmp2		Pcyt1b	6030498E09Rik
Insc	Emc1		Nyap2	Wfdc6a
Smad6	Syk		Spred3	Mcm6
2900011O08Rik	Zfp473		Cldn2	Rnf138
Ccl9	4930432K21Rik		Tox2	Xlr
Zfp862-ps	Espl1		Synj2	Gm20402
E030042O20Rik	4930518J20Rik		Pde3b	Gm15701
Smim10l1	Usp53		Rab17	Xlr4b
Plxnb1	Gm2237		Rab3c	Gm14565
4930516B21Rik	Armc8		Gpr183	Ryr2
Grin3a	Kat7		Rnf169	Gm37913
Rab3il1	Isyna1		Limch1	Lrig1
Nol3	Cmtm7		Pimreg	Pcp4l1
Bcl2l11	AW551984		Tulp4	Tspan1
Ppp2r2b	Wapl		Kcnk6	Gm1840
Cyp4f17	Rhox7a		Pantr2	Adrb3
Clcnka	Tle4		Cnih2	Pak1ip1
Amotl1	Tcea1-ps1		Svep1	Ankrd34a
Elk3	Xlr3c		Igf1r	Smg1
Apc2	Bhlhe40		Lingo2	D10Wsu102e
Gcnt1	Rtkn2		Cck	Krtcap3
Ip6k2	Rnf125		Clcnka	Bcap29
Mapt	Col6a6		Zfp266	Kiz
Zfp629	Pex7		Tnfaip3	S100a1
Crb3	Jade3		Chsy3	Sox30
Drp2	Slc4a2		Jhy	Znfx1
Snap25	Pprc1		Enho	Prkcq
Trim9	Fbxl13		Gm14285	Gmnc
Car13	Sbno1		Gpr161	Ccnb1
2310015A10Rik	Ddx27		Rab8b	Nudt6
Galnt3	Ccnb1ip1		Sost	Nhlrc1
Steap2	P4ha1		Gm20775	Gcm1
Vav3	Gm11346		Prph	Zfp981
Actb	Galnt1		Fem1a	Axl
4930563E18Rik	Dgkd		8430419K02Rik	Cxcr4
Tmem30b	Ppan		Slc5a7	Mgme1
Dlgap4	Pot1a		Runx2os1	Sema4b
Ptgs2	Taf5		Cblb	Zwilch
Gm15387	Usp37		E2f7	Surf6
Gck	Plppr4		Pkp3	Gart
Chd4	Tlr12		Nap1l5	Adgrb2
Ptpn14	Gm17334		Cdc42se1	Gnpnat1
Pbx4	Pdgfb		Alg11	Otud3
Itgbl1	Carmil1		Zfp445	Cpa1
Adamts17	Rangap1		Abca5	Zfp874a
Gm16010	Zfp385b		Slc2a10	Nr5a2
Ccdc114	Aasdh		Kcnh5	Tm4sf5
Cdkn1a	Nts		Gm15594	Gcnt2
Trps1	Mir6357		Tnfrsf14	Klf2
Mtch1	Prkar2b		Tmem181a	Ppp1r3g
Asb13	Cdca5		B3galt5	Riox1
Gm16141	Ezh1		Tmem132c	Eif2b3
Id1	Gm37245		Zc3hav1l	Cln3
Crp	Agap1		Vezf1	Meioc
Gabrb2	Siah1b		Clasp1	Mrps28
Zfp266	Parp4		Lyz1	Recql
Gm45133	Cox7a1		Nol3	Aven
Gprc5c	Mov10		Slc16a7	Rnaset2b
1700023H06Rik	C130032M10Rik		Matn4	Wdr43
Cnksr1	Gm1840		Reck	Trim13
Pcyox1l	Odc1		Mtus1	Slc30a5
Mfap5	Prpsap1		Rin1	Ncapd2
Plekha5	2210411M09Rik		Slc38a5	Tfe3
Tcaf1	Pitpnm2		Prss8	Trap1
2310002F09Rik	Spag1		Slx4ip	Kcnh1
4931428F04Rik	Zfp36l2		Sv2c	Hspa9
Gxylt2	Mylk3		Cnot6	Smyd4
Themis2	Dars2		Ankrd1	Fmo5
Impact	Msc		Actb	Polr3e
Dlg4	Lgals9		Cela1	Fra10ac1
Dock11	Fndc1		Hba-x	Zfp36l2
Gm38082	0610039K10Rik		Zfp871	Med17
Ccdc74a	Tnni1		Aph1b	Jcad
Zfand1	Fam83d		C3ar1	Nrde2
Zfp385a	Gm20421		Gdf5	Taf7l
Gm13415	C1galt1		Slfn2	Sbno1
Fnbp1l	Zfyve28		Poc1b	Mup6
Hs3st4	Mtm1		1110002L01Rik	Rad51c
Gm43621	Bcat2		Acer2	E2f1
Mob3b	Pak1ip1		Pde1b	Mgmt
Cpz	Pole		Slc29a4	Grtp1
Ptprs	Cct2		Zfp810	Dct
Adcy4	Pwwp2b		Napsa	Hpse
Gdap1l1	Nfatc2		Rem2	Kctd3
Tmem9	Fbxo17		Kremen2	1700030C10Rik
Rhd	Synj2		Depdc1b	Gm42413
Nes	Snapc1		Efcab11	Marc2
Syndig1	E2f1		Lix1	Stk25
Acer2	Tesmin		Gm26883	Cct8
Slc16a10	Tdp2		Ccm2l	Nek2
Gm9752	Cep250		Sstr1	Als2cl
Nap1l2	Hspa1b		Dqx1	Lipg
Sv2c	Mtmr7		Dsel	Nop14
Tmem47	Nanos3		Mgat3	Slc25a26
AV356131	A730049H05Rik		C2cd4a	Wee1
Myl6	Znfx1		Gm13070	Rpp38
Cdk14	Chtf18		Chd3	Acat3
Mzf1	Rsg1		Meg3	Scrt2
5930430L01Rik	Tor3a		1110032F04Rik	Nolc1
Pimreg	Mphosph8		Fabp5	Rack1
C230034O21Rik	Srp9		Creb1	Abcc4
Clvs2	1700030J22Rik		D630003M21Rik	Boll
Copg2	Il17d		Sik1	Itih5
Sncaip	Mcmbp		Prune2	Arhgap26
Fermt3	Urb1		Gm20647	Ltv1
Skap1	Hltf		Slc35a2	Gnl1
Mafb	Klhl23		Sash3	Abcd4
2610001A08Rik	Inf2		Klhl6	Zfp978
Evl	Tmem150c		Gli3	Gadd45g
Aadat	2310061I04Rik		Lrch3	Zfp692
Dok5	Gm38336		Zfp334	Gnl2
Kifc1	Zfp951		Gm20528	Ccnb2
Rnf169	Uhrf1bp1		Ppp1r3b	Gm9920
Tppp3	Btg2		Dubr	Senp3
Rian	Zbed5		Zfp369	Tcf7
Tnnt3	Ckap2		Nexn	Cds1
Dapk1	Trip10		Cadm2	Ddx27
Sfrp5	Gm14261		Fam212a	Layn
Nwd2	Rasgrf2		Specc1	Nav2
Acvr2b	Pvr		Syp	Cdc7
Tnfrsf13b	Rps6ka1		Mllt3	Pim3
Chtf8	Hacd2		Gm12258	Dlat
Slco2a1	Col16a1		Ttc26	Ash2l
Gm11940	1700001L05Rik		Tmem200a	Pla1a
Asxl3	Cygb		D430019H16Rik	Nrap
Rac3	Ndfip1		Gm15587	Gm27308
Serping1	Trim6		Eno3	Eif2d
Vldlr	Dglucy		Hid1	Skiv2l2
Gm16599	Six1		Gm26719	Nit2
Gm30873	Gm38058		Tes	Gm14399
Gpc2	Armcx6		Slc38a4	Rhox2c
Tcp11	Scamp5		Cftr	Lncenc1
Ptchd1	Rundc3b		Tmem167	Pprc1
Redrum	Nfatc2ip		Ankrd6	Chd1l
Gdf5	Vcpip1		Asb2	Lancl3
Syt1	Srgap3		Oprl1	Fam173b
Sh3yl1	Heyl		Ermap	Pgp
Zfp462	Gm45141		Dysf	Ftsj1
Thbs4	Sox6		Lrrc49	Nfe2l2
Kcnq5	Palb2		Ptprt	Ces2g
Fam46a	Clcn2		Itgav	Gm16153
Gm1673	Pan2		Hes1	Gm6798
Rpsa	Nup133		Ccnd2	E130308A19Rik
Thsd4	Colgalt1		St6galnac5	Zfp39
Syt3	Cad		Lrrc58	Igsf9b
Lrrtm4	Gli2		Cspg4	Plekhf1
Matk	Nup35		Cdc14a	Mst1r
Sh3pxd2b	Wdr43		Ssc5d	Gm17354
Shc2	Cul2		Golm1	Prkar2b
Mtmr11	Atmin		Ccnj	Fbxo47
Gm44089	Atg9b		Dscam	Gm3636
Stmn3	Gm20402		Adamts4	Birc2
Bmt2	Scfd2		Chic1	Ddx39
Ezr	Herc3		Pbxip1	Polr2g
Spred3	Ddhd1		5330417C22Rik	Mapkapk3
Mterf2	Afg3l2		Galnt3	Panct2
Adap1	Exosc5		Gm16401	1700028I16Rik
Bean1	Cyp2s1		Gm26507	Fut10
Ank2	Topbp1		Fam174b	Prpsap2
Mturn	Ppp3cc		Fgf14	Tuft1
2010015M23Rik	Cpeb2		Hp	Dmpk
Lrfn3	Cenpi		Prex2	Nup88
Gfpt2	Trim25		Gm9913	Chtf18
Arl2bp	Hoxd9		Gm15688	Gm17334
Ms4a6d	Atp11b		Rhd	Eif3g
Tub	Cks2		Gm13726	AI661453
Stom	Polr1b		Tmem18	Smpd5
Cdhr2	Gspt1		Vmn1r68	Ltbp3
Cdk18	Ccnb1		Plekhg2	Rictor
Pcdh11x	Gm26899		Cadps	Smc3
Nkain1	Oplah		Dhh	Mrto4
4930563E22Rik	Hebp2		Susd4	Rhox2d
Irx3	Fbl		Gm26735	Gm10382
Arglu1	Zbtb11		Gpm6b	Tfb1m
Gm15612	Hif1a		Tusc1	Pla2g7
6330418K02Rik	Nos2		Shh	Engase
Map1b	Gadd45g		Loxl1	Urgcp
Btg1	Pecam1		Kif1a	Acan
Ecel1	Gnai1		Mageh1	Tnfrsf10b
Porcn	Gm12940		Ulbp1	Lap3
Hdx	Rasgrp2		Mthfd2l	Kctd6
Rnf122	Ftsj3		D430041D05Rik	Vill
Klk14	Itga6		Bcat1	Gmpr
Gm16054	5830462I19Rik		Mfsd6l	Thumpd3
Alox5ap	Nup160		Sbk1	Gm6445
Fam217a	Masp1		Zswim5	Gm17080
Ldb1	Ier2		Dyrk2	Yrdc
Samd4	Gm15283		Slc5a3	Rest
Mab21l1	Mras		Crlf1	Dhps
Gpr173	Dclre1a		Prkaa2	Slc35g1
Kcnip3	Gm37297		Fads1	Nr2e3
Trim46	Samhd1		Redrum	Fxr1
Gm16793	4931406P16Rik		Lbhd1	Thop1
Kcnq1ot1	Rps6kl1		Cd53	Srpx2
Loxl1	Atg16l2		Adgra2	Hmces
Gm4876	4930558J18Rik		Raver2	C130032M10Rik
Fmnl1	Lrig1		Gm12063	Zfp428
Csrnp3	Plekhm1		Plat	Parn
Kcnb1	Gm16048		Acat2	Sccpdh
Fam168a	Kdelr3		2310022B05Rik	Ccdc61
Sp7	Gm9888		Ccdc141	Enpp4
Atoh8	Polr1a		Fendrr	Rhox1
Vil1	Brpf3		Srrm3	Ddhd1
Inpp4b	Chpf		Slc4a1	Fbxo2
Nptx1	Hsp90aa1		Fem1b	AI427809
Net1	Wdr3		D330045A20Rik	Akr1b10
Gm15688	Atp2b4		Gm10860	Rplp1
Cttnbp2nl	Ppat		Fam163a	Psme1
Gm42067	Nid1		Srgap1	Atp6v1c1
Sema3a	Ercc6l		Fbxo40	Dsp
Ikzf4	Cox18		Gdf10	Nanos3
Pnliprp1	Brip1		Ros1	Zfp640
Ampd3	Lars		Bicd2	Pgghg
Dpysl2	Gm43481		Gm26871	Taf6l
Gm29202	Gm16066		Atxn1l	Prss42
Sorbs2	Tmem255b		Slc44a4	Anxa2
Itgb4	Sppl2a		Dlx5	Gm10044
Itga3	Ddx19b		Gnas	Sall3
Zfp386	Rpl14-ps1		Ace	Lancl1
Clcf1	Dlat		Dzip1l	Gucy1a1
Grid1	Arhgap19		Gm28265	Ggt5
Naaladl2	Fanci		2610301B20Rik	Crym
Rps6ka6	Tma16		Plppr1	Dus1l
Dab1	Sept11		Adam22	Fbxo21
Rhag	Ect2		Thbs1	Gm26819
Spink8	Hspa12a		Skap1	Rpp40
Slc15a2	Wee1		Gm9938	Nmnat3
Anxa3	Mios		Arl4c	Sfmbt1
Ap1m2	4930550L24Rik		Camk4	Zbtb7c
Arhgap30	Helb		F3	Scmh1
Capn2	Cd164		Tlr4	Elac2
Adcy2	Wdr62		Ssbp2	Scaper
Megf10	Ephb1		Gm13111	Nr0b2
Magi2	Ints4		Gm16141	Mtss1l
Car7	Kif11		Cacnb3	Ninj1
Pdzk1ip1	Triml2		Marveld1	Med10
B3gnt3	Bard1		Slc25a37	Mbp
Cacng4	Pim1		Tppp3	Gtf2f2
Trappc6a	Acaa1b		Sept11	Kctd18
Lin28b	Mtmr14		Lrp3	Rmnd1
Cldn34c1	Sobp		Saa1	Gm26648
Glis1	Nmi		Klf1	Sod1
Lrch2	Gm9899		Spink1	Chchd4
Pfn2	Map2k1		Opcml	Cd164l2
Gpd1	Fzd5		Unc13c	Wdr18
Ints6l	Larp1b		Acsl4	Ubtf
Gpc3	Mthfd1		Itga3	Park7
Epm2aip1	Ubl3		D130017N08Rik	Rasgef1b
Gm26894	Exoc3l2		Tagln2	Tagap1
Sash3	Klhl32		Zkscan8	Eef1e1
Plek	Maged1		Fam149a	Wdr55
Neu1	Vrtn		Gm20721	Impdh1
Tmem108	Oit3		Slc18a1	Siglec5
Stard10	Tdrd7		Gpr22	Pald1
Sh3rf1	Ppp1r14c		Atp8b1	Stxbp1
Nup62cl	Pkig		Gm6768	Ints3
P4htm	Aldh1b1		Vstm2l	Col9a2
Cpeb4	Ttk		Miat	Anp32b
H3f3a	Pmepa1		Tril	Ckap2
Nkain3	Xlr3a		Ppp1r3d	Dhx32
Lpar3	Wdhd1		Tie1	Esr1
Gm26858	Cops7a		Cdkl1	1700003F12Rik
Camk1g	Thg1l		Ceacam-ps1	Cyp4f13
Foxred2	Ptpn6		Gm12523	Kat2b
Zfr2	Stbd1		Slc2a4	Zswim3
Rarres2	Flcn		Nxpe3	Slc36a1
Eid1	2900026A02Rik		4930533K18Rik	Klf10
Mylip	Ppp1r13b		AA986860	Prim1
Wscd2	Osgep		Myl4	Smndc1
Srgap1	Smarca1		Gm28294	Tcp1
Nr2f2	Gm17936		Megf6	Cdkn1a
Grk3	Pxk		4933404O12Rik	Osbpl1a
Phc2	Atp1a2		Hmgb1-ps3	Mcmbp
Ces1h	6030458C11Rik		Rnf122	Enoph1
Zfp14	Sat2		Sowahb	Avpi1
Dtnbp1	Arhgap23		Vash2	Klhl12
Clec11a	Rab20		Nwd2	Etfbkmt
Ccdc106	Immt		Acss3	Klf11
Far1	Exo1		Ikzf5	Rpl14
Mad2l2	Trappc8		Gm42901	Hint2
Tspan13	Vcam1		Gm45779	C1qbp
Gt(ROSA)26Sor	Fndc3b		Gatad2b	9130401M01Rik
Gmds	Akap1		Gm8116	Plekhm1
Anpep	Nars2		Slc6a15	4930548H24Rik
Arid3a	BC055324		Anks4b	Asah1
Cuedc2	Fabp3		Cox7b	Tktl1
Npdc1	Asah1		Speer4cos	Car5b
Gpr161	Clip4		Ptger4	Abcc2
Pgf	Eda2r		Traf6	Polr3g
Tmem55a	Zfp125		Tmem246	Rimbp2
B230219D22Rik	Kazn		Prnp	Arvcf
Gm14597	Pds5a		Rap2a	Gm13032
Lyz2	Top3b		Kcnn4	Sf3b3
Arhgap29	Snx3		Hunk	Zfp395
Slc38a6	Ccdc117		Pank3	Mboat2
2310022B05Rik	Nudt4		Sema3b	Suz12
Marcks	Pex26		Parva	Etfdh
Zfp422	Cdca2		Hspg2	Thyn1
Parm1	Fbxo31		Dusp10	Cers4
Zbtb5	3110001I22Rik		Fktn	Plaa
Prph	Khsrp		Bmpr1b	Rexo2
Pold4	Birc3		Kctd1	Emb
Bak1	Gm42609		Dzip1	Hsp90ab1
Pglyrp1	Anapc1		Prkar2a	Cct7
Hivep1	Wdr75		Plekhd1	Zfp622
Tcf12	Nmnat3		Gm26580	Tcp11l2
Scarf2	Paqr5		Zswim9	Cep170b
Lcp1	Pja1		G6pc2	Gss
Plscr3	Fbxl5		Trps1	Shq1
Lrrc61	Noc2l		Pcdhgb2	Col6a6
Cyp51	Fam185a		Tnfrsf26	Gm2381
Cacna2d1	Rab3gap2		Btk	Plekhg3
Adamts4	Dcaf13		Gm26742	Mrpl42
Capn10	Fra10ac1		2700081O15Rik	Cntnap5a
Chmp2b	Heatr5a		Sema3d	Nup210
Prox1	Cyb5r3		Mfap5	Khsrp
Agps	Tmem248		Arap3	Rpl4
Zmat4	Paqr7		Wbp1l	Capn1
Tekt1	Syap1		Arhgef16	Bckdk
Scarf1	Sh2d4a		Ccdc71l	Gm35986
Adm	Atpaf2		Thbd	Nodal
2610318N02Rik	Nol9		Egfr	Rrp1b
Krt8	Als2cl		Gm16183	Cast
Dalrd3	Ctgf		Tceal5	Tmem53
Ttc9	Dnaja3		Flt1	Cdkl4
Gm3375	1810014B01Rik		Hcls1	Ttyh2
AI464131	Gm42836		Gm12355	4933413J09Rik
Suox	Snx14		Mbnl1	Lctl
Poc1b	Gm37335		D930007P13Rik	Hacl1
Letmd1	Prkcb		Naaladl2	Aqp2
Gpr162	Hapln3		Olfr1372-ps1	Gsg1l
Cntnap2	Ipo4		5730585A16Rik	Ptcd2
Jam3	Kbtbd8		Pnlip	Ptpn2
Gm26751	Ssx2ip		Tnmd	Vac14
Cox4i2	Shq1		Akr1e1	Snx27
Gm4524	Phtf2		Kalrn	Naa25
Dbnl	Tmem87b		Aldh1a2	Zfp612
Gm17275	Ddias		Scn5a	Dpp7
Gm8210	Cd320		Chml	Nelfa
Osbpl6	Cluh		Nol4	Mmp15
Gm8666	Aurka		Gkn3	Igsf21
B3galt5	Kctd3		Bdh2	Clpp
Ago1	2700049A03Rik		Fam46a	Lrrc8d
Pigx	Anln		Aplnr	Hmgb2
Degs2	Rictor		Mrgpra3	4931440J10Rik
Tspyl3	Gm26840		Steap1	A530016L24Rik
Kirrel3	Mycbp		Mstn	Perp
Edn1	Syn3		Uhrf1	Coq3
H1fx	Map4k2		Trabd2b	Gm12346
Rbpj	Med14		Rac2	Snx9
Slc43a2	Dnajc13		Adra2c	Cdk5
Faah	Azi2		Sdc3	Ubc
Gm42418	Grn		Tnfrsf22	Impdh2
Fhod3	Me2		Deaf1	Neu3
Wnt2b	Rlim		Slc22a6	Gtf2f1
Pax1	Pdgfa		Tnks	Gm17509
Tyrobp	Igfbpl1		Oacyl	Slc25a32
Igtp	Gstcd		Ptch1	Rpl6
Airn	Plppr5		Mettl7a1	Slc29a1
Ago2	Acbd3		Lox	Pcgf6
Mn1	Acot1		Mospd2	Bcas2
Tie1	Gtf2e2		Gm13031	Gpcpd1
Pygo1	Aldh9a1		Fv1	Oxnad1
Gltp	C2cd5		Gm2065	Gm43023
Tmub1	Ltbp3		Ap1m2	Pnkd
Tmem158	Frat2		Lrrc14b	Naa11
Kif21b	Oip5		A330040F15Rik	Rps23
Lpp	Cars2		Rhag	Nfxl1
Limk2	Vdac3-ps1		Ch25h	Lrrc4
Gsn	Foxn2		Sall1	Itgb5
Stac	Hspa14		Spink10	Gtsf1l
Lima1	Sfmbt1		Airn	Ccdc170
Sp4	BC049715		C7	Rhox4g
Pigm	Asf1b		Plch1	Plekhh1
Bmpr1a	Gm15708		Gm15270	Sgms2
Morn4	Mmp9		Eps8l2	C430049E01Rik
Efna2	Skiv2l2		Pik3cg	Ehhadh
Stx1b	Eogt		Acox3	AI506816
Tstd3	Ogg1		Wdr86	Gm5850
Spry3	Frem1		A430105I19Rik	Efna1
Gm13442	Galnt6		Cyp26a1	Gas7
Mfsd1	Gsta3		Smim10l1	Ercc6l
Bach1	Gna12		4833422C13Rik	Rhox2h
Amot	Lctl		Efna4	Pde1a
Slc29a4	Trerf1		Tstd3	Syngr2
Inpp5f	Spry1		Rsph3b	Aplf
Eef2k	Tgm2		Gm15387	Ttc5
Cnn3	Pask		Plet1	Tor4a
2610307P16Rik	AA414768		Saa2	Zbtb8a
Cldn2	Sybu		Gli2	Mthfd1
Plcl1	Ppp1r13l		Cd14	Pgc
Yaf2	Gm42596		Sept6	Ruvbl1
Fgf5	Kcnh3		Sgtb	Wasf3
Clip1	Cep192		Gm43061	Stbd1
Hyal2	Gm14295		Gm15962	B3gnt8
Mllt11	Atg101		Dleu2	Fam50a
Hoxb1	Pilra		Ccl6	Edem2
Ppdpf	Ssfa2		Kcnc2	Aunip
Aatk	Lbr		Irs1	Larp1
Plscr1	Camkk2		Cacna1e	Zfp951
2810021J22Rik	Ppp1r36		Lats1	4930523C07Rik
Repin1	Slc11a1		Klk14	Trmt1l
Mpzl1	Farsb		Rftn2	Fam110c
Rcbtb2	Acat1		Myo1g	Gm17178
H2-K1	Jag2		Ppl	Mtg1
Ptprc	1700126G02Rik		Wnt7b	Mcm8
B4galt6	Hsp90b1		Dusp6	Trim50
Selenon	Klf4		Tmem151b	Arl4d
Elmo3	Tle6		Tubb6	Dyrk3
Hif3a	Phlda3		Nbea	Pygb
Zcchc3	Odf2		Nlgn1	4930458D05Rik
2810013P06Rik	Ggt5		Leprotl1	Glp1r
Nrxn2	Nup205		Arhgef15	Cct4
Msantd4	Gsr		Syncrip	Lyar
Lck	Zwint		Cnrip1	Palmd
Meg3			Myrf	Greb1
Arpin			1810041L15Rik	Mmp23
Nudt11			Hoxa11	Cd2ap
Pde3b			Asxl3	Npw
Sh3pxd2a			Khdrbs3	Pld3
Dgat2			Klhl7	Baiap2l1
Tbc1d16			Fnbp1l	Ap5b1
Tmem98			Senp5	Srpk1
Rpgrip1			Ccne2	Ech1
Zfp810			C1qa	Mycbp
Haglr			Asphd2	Fam20a
Rspo1			Arhgef37	Nupl1
Zhx2			Nlrc3	Plekhg5
Plppr2			Tfap2a	Tm7sf3
Sema6a			Cyp4f17	Wdr64
Gpr137c			Nckap1l	Akr1b3
Lmo1			Galnt4	Snhg4
Polr2m			Gm10557	Hgsnat
Zfp536			Gm9996	Xrn2
Masp2			BC030336	6820402A03Rik
Gm13889			Gpsm1	Cct3
Mboat1			2900097C17Rik	Gm15708
Elmod1			Gm42460	Slc29a2
Sept5			Rgs8	Mettl22
Anp32a			Syt4	Itpr1
Eps8l3			Ppfia2	Abhd6
Fjx1			Camk2n1	B4galnt3
Dhrs3			Gm16793	L1td1
Clic4			Gm15050	Esf1
Evc			Gm45819	Slc39a14
Ebf1			Eps8l3	Lipt1
Serinc4			Tead2	Fbxo22
Zfp334			Vgf	Gnat2
Scnn1a			Mllt11	A730017C20Rik
Prkar2a			Bhlhe22	Rtraf
Gata6			Mzf1	Ndufs7
Slc24a3			Tspan18	Pdp1
Cbx5			Col14a1	E030037K01Rik
Crebzf			Kbtbd11	Gm26571
Sh3bgrl3			Mtmr11	Grhl1
Gnas			Sntb1	Hltf
Bach2			Tmem198b	Gm16794
Sms			Gm26617	Mrm3
Tpmt			Pkhd1	Ccdc14
E330009J07Rik			Arhgef6	Wnt5b
Lrp6			Nos3	Sh3d21
Marveld1			Ythdf3	Ambra1
Pard6g			Fgf12	Phtf2
Rnd3			Thap2	En2
Atxn7l3b			4930412O13Rik	Mtfr1l
Col3a1			Gpr21	Aspscr1
Kdm6bos			Igsf3	Klf17
Slc9a3r1			Cd38	Sapcd2
Tnfrsf22			Rnf144a	Fancb
Sec22c			Nov	Pfkfb4
Fam109b			Ncan	Axin2
Rtl8a			Kif1b	Lpin3
Zfp672			Gm38708	Col6a2
Zfp277			Ssh1	Pspc1
Tpm4			Ncf1	Cryzl2
9230110C19Rik			Sdc2	Flot2
Pla2g15			Cdk2ap1	Kcnk5
St8sia4			Grk3	2700049A03Rik
Ctdsp2			Calcrl	Cdca5
Myom1			Ifi203	Znrd1as
Ptbp2			Pcdhb19	Ntpcr
Ccdc50			Prr11	Ppp1cc
Slitrk4			F830016B08Rik	Scamp5
Dusp26			Tgfb1	Adsl
Ptprz1			D330041H03Rik	Cdk15
Grina			Ephb3	Sec1
Gpr155			Themis2	Gm30132
Myo5a			Serpina3h	Cabp7
Lysmd3			Gm44751	Gpn3
Npr2			Stxbp4	Gm8822
Fes			Adamtsl1	Nkx1-1
Snhg20			Mall	Tomm34
Ndn			Flnb	Zfpm2
Epb41			1700001O22Rik	Gars
Rgma			Sox8	Gadd45b
Prps2			Cdh5	Mansc4
Rragd			Gm5601	Osgep
Mvk			Atp6v0a4	Thap4
Rab11fip2			Cldn3	Slc39a4
Fads1			A730062M13Rik	Ccdc191
Zfp61			Tgfbr2	Pld5
Gm14681			Stard13	1700001L05Rik
Adra1d			F5	Cdyl2
Dnajb5			1700025G04Rik	Dedd2
Slc4a4			Gm11624	Slc38a8
Gm34030			Ajap1	Tmem97
Smim3			Cxxc5	Med9
Gimap1			Slc8a1	Morn2
Has3			Flna	2010204K13Rik
Zfp516			Caps2	Spire2
Ogfr			Fcgr3	Pmf1
Gm5898			Mfsd2a	Ablim2
Hmgcs1			Arhgef40	Gm26577
Gm14964			Sh2d3c	Psmd5
Runx1t1			Gm26984	Ipo4
Gng11			Ctdsp2	Zfp655
Sept1			Rbfox2	Pelp1
Syne4			Rac3	Rpl5
Tbcb			Car3	Tmem41a
Rab5c			Gm11868	6030419C18Rik
Ndst1			Mir1905	Gm15788
Tmem18			Cdhr2	Tmem230
Map2k6			Slc6a13	Kif2c
Ptpn13			Dcc	Usp8
Runx1			AU022252	Fig4
Ksr2			Pcdhb17	Cdc34
Upp1			Ccl9	Grwd1
Gm9816			Smad1	Cox11
Zik1			Tlr7	Cyp1a1
Gnai2			Zkscan16	Slc16a2
Cyb5b			Arhgap20os	Rplp2
Snai1			Plac8	Gm7676
Sigirr			Gm4524	Fbrsl1
Bicc1			Gpr137c	Slc25a1
Marveld2			Lrriq1	Rrs1
Rassf7			Gm12898	Setdb2
Hs3st1			Pfn2	Gm11899
Ssbp2			Plxnb1	Sgol2a
Arhgap24			Slc4a9	Fam241b
Gstk1			Mlec	Dpf1
Actg1			Irs4	Kcnk12
2810408A11Rik			Edn1	Dhdh
Rab15			Mfap3l	Gm45470
Tgfb1i1			Cyp51	Chadl
Scyl2			Lhx2	Rae1
Fam189b			Fgd2	1110008L16Rik
Stx2			Ar	Snx3
Frk			4921534H16Rik	Trmt2b
Plekhg2			Nova1	Dnajc2
Gm1821			Nkx3-1	Gm9894
Vgll4			Podxl2	1190002N15Rik
Nova1			Halr1	Cables1
Hap1			Fndc4	Piwil4
Gm43126			C330007P06Rik	Ttc27
D630003M21Rik			Plppr2	Dkc1
Syt14			Grid2	Gm10459
Zfp286			Kera	Lonp1
Gskip			Ptpn14	Ackr4
Epop			Gm37644	Tab3
Cd59a			Arhgap35	Pigt
Bace1			Wscd2	Cct6a
Cacnb1			Phf21b	Mdm2
Ptpn4			Gm45074	Ppp5c
Cnot6			Rgs7bp	Pus7
Ranbp6			Gm3149	Pms1
Mospd2			Smpd3	Usp16
Raly			Erbb2	Ptcd3
Rtl8b			Zswim8	Sdhaf4
1010001N08Rik			Mob1b	Hspe1
Ppp1r9a			Emilin1	Trak1
Junos			Rab36	Cyp2s1
Ehd2			Crybg3	Ahsa1
Entpd1			Gm28523	Tmco6
Gm26776			Coa5	Nsa2
Stard13			Mfsd4a	Abhd14a
CT010467.1			Loxl2	4930558J18Rik
Rusc1			Myl6	Ucp2
Gm15564			Adap1	B4galt5
Kif1c			Lpar3	Slc16a4
Dlg3			Prr16	Wsb2
Parvb			Dao	Tex13c2
Gm14403			Gpr176	Nsrp1
Cth			Gm16192	Acad12
Dok2			Ppp3ca	Atg2a
Zfp260			Stxbp6	Nat8l
Tbx20			2810410L24Rik	Mgst1
Trp53inp2			Hcn4	Zfp839
Mknk2			C1s1	Dnttip2
Cdh24			Cerkl	Wfs1
Spta1			Dok6	Syde2
Zfp697			Top2b	C1rl
Zfp975			Eddm3b	Manba
Oprl1			Gpr50	Lmo7
Gdf2			Smtn	Ces1h
Nucb2			Il1rapl2	Rpl13
Gm20721			Hspa1l	Cyp2f2
Kif2a			Ifi207	Atr
Ptger3			Zdhhc17	Cdcp1
Smo			Fam171a1	Lrrc42
Gm17276			Trak2	Slc25a42
Scn2b			Gm12709	1700037H04Rik
Pik3ip1			Zfp422	Mrps24
Lpar4			Cblc	Foxn2
B130024G19Rik			Luzp2	Polr3b
Sorl1			Mid2	Mavs
Josd2			Cfap43	Ttc38
Crat			Upk1a	Rreb1
Mfap3l			Otub2	Nfkbid
Aplp1			Smcr8	Psmd2
Shisa4			Kcnd3	Mark1
Fis1			B3galt1	Pole
Car8			Arsb	Larp7
Usf1			Tnfaip8l2	Gtf2h1
Dll1			Aff4	Ncoa3
Ube2d1			Gm15737	Rad51d
4930594M22Rik			Gm16263	Il34
Unc119b			Spdya	Bub1
Cxxc4			Pdgfrl	Aifm1
Tspan2			Fam168b	Gm29477
Atat1			Arhgef9	Rnf34
Sgtb			Cav2	C920006O11Rik
Rps3a1			Gm43751	Sfn
C630043F03Rik			Gm14324	Cep250
Cdk4			Fcna	Gemin6
Lyn			Paqr5	Rps6kl1
Nespas			Lhfpl3	Secisbp2
			Rtn1	Krt7
			Pmp22	Anpep
			H2afz	Mrps31
			Gm29331	Mybbp1a
			Ptgis	Supv3l1
			Pcdhgb5	4933434E20Rik
			Arhgap24	Sdad1
			9530052E02Rik	Fbl
			Abhd5	Rfc4
			Brip1os	Mapk8ip2
			Gpr173	Wdr34
			Yaf2	Pdcd4
			Tmod3	Ralbp1
			B230334C09Rik	Mto1
			Gm16499	Sdr42e1
			A730020E08Rik	Pcx
			Arhgef10	Parp9
			Itgb2	Rangrf
			Col4a6	Zfp988
			Adh6b	Tbrg4
			Hnf1aos1	Idh3a
			Ccdc89	Znhit6
			Ticam2	Tti1
			Zbtb34	Mtfmt
			A330015K06Rik	Aqp5
			Gm17641	Cnot2
			Cdh26	Zfp534
			Mmp14	Nae1
			Cbln2	Cth
			Fam49a	Rfc5
			Gm37456	Gpbp1
			Nptx2	Etv4
			Slc15a2	Hexb
			Selenom	Gatb
			Senp7	Dus3l
			Vamp2	Fanci
			Fam84b	Tfeb
			Hpcal4	Sestd1
			Htr7	Kcnn2
			Ttpal	Nub1
			Ano10	Gm45552
			Gpc2	Nr4a1
			Zbtb6	Baiap3
			BE692007	Gm12256
			Pde4d	Gm10550
			Tsc22d3	Ptch2
			Gm13571	Cebpz
			Zfp329	Shisa6
			B4galnt4	Tuba4a
			Ly75	Cdkn2aip
			Pzp	Vbp1
			9330132A10Rik	Mir292
			Gm26691	Mphosph10
			Myh9	Tff2
			Aif1l	Wnt4
			Mrvi1	Wt1
			2010300F17Rik	Tlx3
			Fam217a	Herc4
			Samd9l	Zbtb38
			Pcdhb7	Paics
			Epb41l3	Eif4ebp1
			Rwdd4a	Coro2b
			Nxn	Ube2z
			Per2	Ints10
			Gm12108	Gnl3
			Dpep1	Dnajb6
			Gm14404	Ndufa6
			Gm2061	Rasa3
			Akna	Utp18
			Zfp827	Dcaf12l2
			Gm44089	Abhd11
			Pygo1	Ice2
			Rusc1	Ccdc28a
			Ptprd	Trim26
			Tcf15	Anapc15
			Mical1	Hpf1
			Asb9	Hsph1
			Epb42	Polr3d
			Gm36988	Gm15543
			Hapln3	Slc16a5
			Iglon5	Gm867
			Plekha8	Vwa8
			A730085K08Rik	Mrpl48
			Gm26851	Nampt
			C5ar1	Ccdc91
			Mob3b	Dock2
			1700025A08Rik	AU020206
			Snhg11	Setd3
			Gm42929	Sytl3
			H13	Zmat5
			Gm43391	Cct5
			Mest	Zdhhc23
			Hdx	Gm16253
			Spi1	Gm11489
			Glrb	Six4
			Ccl24	Xpo6
			Sema4c	Rnft1
			Speg	Exosc7
			Fsip2	Fancd2os
			Abi3	Gm15500
			Fam102b	Slc25a3
			Cyb5d1	Itga11
[truncated: 2,185 more rows]

## Sheet: (B).Transcripts
E12DOWN in Male	E12UP in Male	Male biased transcripts	E12DOWN in Female	E12UP in Female	Female biased transcripts
Gm13394-201	Rps2-208	Amh-201	Gm13394-201	Kctd14-202	Fst-202
Rps2-ps13-201	Amh-201	Col9a3-201	Vcp-rs-201	Gm12671-201	Fst-201
Vcp-rs-201	Kctd14-202	Dhh-201	Rps2-ps13-201	Gm10359-201	Hspa8-201
Gm15772-201	Gm12671-201	Mro-202	Gm15772-201	Rps2-208	Chrm4-201
Gm4366-201	Gm10359-201	AC161165.2-201	Ctnnd1-223	Hspa8-201	Sprr2d-201
Gm28438-201	Ptgds-202	Prokr2-201	Gm4366-201	Ptpro-203	Phlda2-201
Ctnnd1-223	Arhgap11a-201	Tesc-201	Gm28438-201	Arhgap11a-201	Foxl2-201
Gapdh-206	Gm4204-201	Smoc2-201	Cwc22-211	Rpsa-ps10-201	Gm15501-202
Gm10184-201	Rpsa-ps10-201	Ptgds-204	Actg2-202	Kctd14-203	Fst-203
Eef1g-205	Ptgds-203	Ren1-201	Gm10184-201	Rpl29-202	Fst-204
Cwc22-211	Papss1-205	Sox9-201	Nefl-201	Gm4204-201	Msx1-201
Ddr2-202	Rpl29-202	Sox10-201	Th-201	Tor1aip1-202	Hspa8-203
Rplp0-204	Defb19-201	Mmd2-201	Eef1g-205	Ddx4-202	Calcoco2-202
Foxd1-201	AC161165.2-201	Ptgds-203	Dbh-201	Usp34-205	Tmem171-201
Cldn8-201	Dhh-201	Lefty2-201	Gm8615-202	Rpl29-201	Irx3-202
Lrrtm1-202	Tor1aip1-202	Cbln4-201	Mab21l2-202	Stk31-201	Lrrn1-201
Ntrk2-205	Tesc-201	Defb19-201	Pitx2-202	Gm7240-204	Lef1-201
Alx1-201	Gm9625-201	Serpine2-201	Ank3-210	Gm9625-201	Lzts1-204
Grik4-201	Fancd2-208	Gdnf-201	Nkx2-3-201	Smc1b-201	Drp2-202
Gm9118-201	Rpl29-201	Tmem184a-201	Rprm-201	Kpna2-201	Col12a1-201
Shisa3-201	Hmgb1-207	Mro-201	Cldn8-201	Foxl2-201	Akap7-203
Disp1-202	Paip1-202	Hhip-201	Cnn1-205	Atp5g1-202	Scrt2-201
Clec18a-203	Kctd14-203	Cbln1-202	Nefm-201	Gm15501-202	4930563E18Rik-201
Crabp1-201	Ren1-201	Hsd17b3-202	Gm13305-205	Emc1-202	Calcoco2-201
Ank3-210	Aard-201	Fbln2-202	Gm10925-201	Rpl34-202	Vav3-202
Rpl35a-ps2-201	Cyp17a1-201	Cbln1-203	Sipa1l1-201	Hmgcs2-201	Calb1-201
Gm10243-201	Gm7240-204	Hsd11b2-201	Cxcl12-201	Dazl-201	Pde8b-208
Rpl35a-ps4-201	Gstm6-203	Padi2-201	Tagln-201	Prcd-202	Porcn-202
Rpl35a-ps3-201	H2afj-202	Islr2-201	Cdh16-204	Rps2-ps10-201	Cds2-201
Rpl35a-ps6-201	Ankrd63-201	Gjb2-201	Gm48529-201	Myh8-201	Sema4d-202
Alx4-201	Kazald1-201	Ptgds-201	Ascl1-201	Sycp1-202	Hotairm1-201
Syt14-203	Espn-212	Tinagl1-203	Pitx2-203	Nrf1-219	Sp5-201
Grb7-201	Col9a3-201	Abhd3-201	Cep131-202	H2afj-202	Fam196b-202
Efemp1-201	Lefty2-201	Pitx2-203	Foxc1-201	Rpl26-201	Adam8-201
Wnt9b-201	Rtn4rl1-201	Col2a1-201	Vcan-202	Gm14224-201	Lypd6b-201
Pdxdc1-204	Stk31-201	Map3k21-201	Hnf1b-203	Hspa8-203	Tnfrsf19-201
Cldn4-201	Tmem184a-201	Fstl4-201	Adh1-201	Nrn1-201	Porcn-205
Ntrk2-204	Nme7-202	Sox8-201	Prdm6-201	Paip1-202	Irx3os-202
Psmb5-202	Gstm6-205	Cyp26b1-205	Actc1-201	Fastkd1-204	Wnt4-201
Ntrk2-202	Stk38l-202	Cadps-201	Foxf1-201	Gng13-201	Nr6a1-201
Hnf1b-203	Nlrp4c-204	Aard-201	Gm22000-201	Fst-202	Pde8b-207
Pdxdc1-201	Acsbg1-201	Cyp17a1-201	Nr1h5-201	Tpm1-212	Tshr-202
Gm5514-201	Atp5g1-202	Cbln1-201	Angpt2-201	Ptpro-201	Gdpd2-201
Gm1821-202	Mro-202	Tmem200b-201	Fndc3c1-201	Zbtb44-205	Adamts19-201
Rarb-201	Zmynd8-204	Gm8615-202	Vwf-203	Hmgb1-207	Porcn-201
Stra6-201	Aldh1a1-201	Enpep-201	Iigp1-202	Tuba3a-201	Bmp2-201
Gm21596-201	Cbln1-202	Gli1-201	Pdxdc1-204	Gstm3-201	Gm9748-201
Cdh6-201	Prss35-201	Fzd9-201	Clec18a-203	Zglp1-201	Acsl4-204
Srsf2-203	Gm14064-201	Dtna-202	Ptx3-201	Rbm44-201	Dcun1d4-202
Zmynd8-220	Tmem184a-202	Tmem184a-202	Foxd1-201	Fn1-211	Wnt9a-202
Gm14681-201	Col9a2-201	Ankrd63-201	Actg2-201	Asz1-201	Atxn7l3-202
Rprm-201	Fzd9-201	Tesc-203	Edil3-202	Dnd1-201	Itpr2-201
Gm13305-205	8030411F24Rik-201	Ptk2b-208	Foxd2-201	Papln-201	Isx-201
Rgs5-201	Poli-201	Cyp26b1-204	Isl1-201	Tex14-201	Kdf1-202
Ecm1-202	Psme1-210	Kcns2-201	Mecom-213	Cpeb1-203	Dcaf12l1-201
Calb1-201	Abhd3-201	Sostdc1-201	Kif12-205	Fst-201	Myh8-201
Cldn6-201	Taf6-202	Prokr2-202	Gm6768-201	Acsbg1-201	Lypd6-202
Angpt1-201	Gm17936-201	8030411F24Rik-201	Gm21596-201	Tmem171-201	Tnfrsf19-202
Kif12-201	Me1-201	Igfbp7-201	Rpl35a-ps2-201	Cpeb1-201	Thbs2-201
Akr1c19-201	Cbln1-203	Hcrtr1-203	Gm10243-201	Gm4779-203	Gata2-201
Adamts18-201	Hmgb1-208	Trim47-202	Rpl35a-ps4-201	Calcoco2-201	Dcaf12l1-202
Hoxb6-201	Mt3-201	Sowahb-201	Rpl35a-ps3-201	Gstm6-205	Stra8-203
Kcnj16-202	Tesc-203	Gstm6-205	Rpl35a-ps6-201	Hormad1-201	Stum-205
Prrx1-201	Kcns2-201	Nt5e-201	Tbx18-201	Nup35-201	Rbm10-202
Hoxc5-201	Otof-202	Mt3-201	Tlx2-201	AC154767.1-201	Gm47040-201
Vps52-203	Myo1a-201	Fam83f-201	Col2a1-201	M1ap-201	Nanog-202
Dach2-201	Fastkd1-204	Lefty1-201	Zmynd8-220	Nlrp4c-201	Gm1821-202
Ddr2-201	Mmd2-201	Hcrtr1-201	Cntfr-204	Gas6-201	Wdr49-201
Cep131-202	Hsd17b3-202	Arfip2-209	Kcns3-202	Slc25a31-201	Dnm2-206
Raet1e-202	Eps8-201	Trim47-201	Cnn1-201	Myo1a-201	Hspa8-204
Cnot2-204	Mettl17-207	Otof-202	Rbm47-202	Gm17936-201	Sulf1-202
Gata3-201	Tinagl1-203	Arhgap6-205	Fibin-201	Fancd2-208	Dclk1-206
Tbx3-203	Rpl26-201	Col9a3-206	Kif12-201	Dnmt3a-204	Gm45765-201
CR974586.6-201	Gstm2-201	Kazald1-201	Alx1-201	Entpd2-201	Cdkn1c-201
Hbb-bh1-201	Gm14038-201	Col9a2-201	Jag1-201	Gpat2-201	Stum-201
Amph-205	Atp1b2-201	Gem-202	Wnt9b-201	Tcea1-ps1-201	Tspoap1-202
Tacstd2-201	Insl3-201	Casq2-201	Chgb-201	Plin1-202	Adm-201
Hnf4a-202	Gstm6-204	Pitx2-202	Mysm1-202	Dcaf12l1-202	Msx2-201
Fndc3c1-201	Apobec3-208	Fgf9-201	Alx4-201	Fst-203	Pard3-221
Zcchc18-203	Nlrp4c-201	Olfml3-202	Hoxb6-201	Acsm3-203	Olfm1-201
Nefm-201	Prokr2-201	Serpine2-203	Acta2-201	Slc7a2-202	Slc22a18-204
Gm44753-202	Lefty1-201	Gtf2ird1-203	Dpysl3-202	Dcaf12l1-201	Adtrp-204
Alx3-201	Gm48795-201	Insl3-201	Dach2-201	Zbtb44-206	Cdkn1c-202
Ecm1-201	Adcy7-201	Col14a1-201	Apobec3-202	Syce1-201	Gdpd2-202
Flrt3-202	Cbln1-201	Mall-201	Tlx2-202	Wfdc1-201	Gm44732-201
Hoxb2-201	Hsd3b1-201	Epyc-201	Dpysl3-204	Piwil2-201	Bace2-201
Tmprss2-201	Cbln4-201	Wwp2-205	Sox10-201	Gm42609-202	Dock4-201
Grhl2-201	AC154767.1-201	Gm2694-205	Isl1-202	Commd3-212	Gatad2a-206
Gemin8-202	Rps15a-203	Mysm1-202	Col8a1-201	Irx3-202	Prcd-202
Fst-202	G3bp2-204	Rtn4rl1-201	Sytl2-205	Lgr4-201	Kcng4-201
Fap-202	Frmd4b-201	Adamts16-201	Ntrk2-205	Rps2-201	Dclk1-203
Nudt14-205	Stag3-201	Tinagl1-202	Dlx2-201	Dclk1-206	Slitrk1-201
Prl3b1-201	Ptgds-204	Spsb3-209	Frzb-201	Lgals7-201	Gxylt2-201
Mbnl1-221	Fstl4-201	Bricd5-202	Fam19a2-203	Dst-215	Anapc15-213
Gm12355-201	4732465J04Rik-202	Smtnl2-201	Phox2b-201	Cpa2-201	Nrap-202
Agtr2-201	Zfp106-211	Hsd3b1-201	Hoxb2-201	Gm8822-201	BC048679-203
Ndst3-201	Col9a3-206	Ripor2-204	Vps52-203	Tfap2c-201	D630039A03Rik-201
Gm7984-201	Dazl-201	Tle6-210	Foxc2-201	Rbmxl2-201	Magi2-202
Crabp2-201	Pkn2-202	Ctrb1-201	Kif12-203	Adad2-201	Rspo1-201
Afp-201	Cspg5-205	Col9a3-204	Prkg1-201	Hormad1-202	Myl1-202
Tpbg-201	Cspg5-203	Pltp-201	Ntrk2-204	Rpl3-201	Col12a1-206
Hoxb3os-202	Hcrtr1-203	Hck-204	Hoxb3os-202	Slc30a9-201	Gata2-202
Prss23-204	Arhgdig-201	Foxs1-201	Gnas-211	Ppig-206	Gm42609-202
Lyve1-201	Dok7-203	Prss12-201	Tmem119-201	Utf1-201	Ercc2-203
H2-D1-202	Gstm6-202	Avpr1a-201	Gm13691-201	AC154506.1-201	Elfn1-201
Nsg2-201	Khdc3-201	Gstm1-201	Gm13697-201	Gm19553-201	Cgn-202
5930403N24Rik-201	Adamts16-201	Stk39-203	Gm13694-201	Map7d2-203	Vgll2-202
Tmem119-201	Gm14224-201	Dtna-201	Gm13693-201	Ubash3a-201	Gxylt2-202
Flrt3-201	Gstm1-201	Vnn1-201	Gm13698-202	Foxr1-201	Cdx2-201
Hoxb5os-202	Adcy9-202	Ticrr-205	Gm13696-202	Gm7666-201	Akr1c14-201
Lrrtm1-203	Enpep-201	Plcxd3-201	Adam12-201	Gdpd2-201	Fam129a-202
Gata2-201	Trim47-202	Bcor-202	Gja5-201	Dppa4-202	Irx3-201
Gfra3-201	D130058E05Rik-202	Plekhs1-203	Tmprss2-201	Sall4-201	Lamb3-201
Tbx3-206	Gm7049-201	Stc1-201	Smoc2-201	Mael-201	Msx1-202
Tspoap1-202	Rpl34-202	Col9a3-205	Chrdl1-202	Mettl17-207	Lrrc34-201
Spon2-201	Ptgds-201	Tox2-202	Slitrk6-201	Smpdl3b-201	Kcnd2-201
Mapk15-201	Hfm1-201	Col14a1-204	Nsg2-201	Rhox9-201	Irx5-201
Chrm4-201	AI506816-205	Robo2-202	Cxcl12-202	Rhox9-204	Thsd7b-202
Prss23os-202	Gjb2-201	Gstm7-201	Pdxdc1-201	Kcnh3-201	Numb-207
Gpi1-206	Cask-203	Fam19a2-203	Gm12355-201	Sycp3-201	Rec8-201
Scg5-201	Nup35-201	Thbd-201	Parm1-201	Tex19.1-201	Adk-207
Hnf1b-201	Hmgb1-210	Gprin3-201	Lpp-202	Alpl-201	Podxl-201
Ntm-203	Tacr3-201	Miox-201	Prl3b1-201	Gng7-203	Il33-201
Stra6-213	Utf1-201	Tspan32-201	Gm16559-201	Lrrc34-201	Radil-202
Cntn1-204	Ptk2b-208	Adh1-201	Nespas-201	Dppa3-201	Tspyl2-203
Hoxb5-201	Adgrg1-201	Pak3-210	Gm5514-201	Pou5f1-201	Hmgxb4-202
1700011H14Rik-201	Prokr2-202	Rerg-202	Moxd1-201	Nlrp4c-204	Nr6a1-202
AK157302-201	Myo6-205	Gstm6-203	Vcan-203	Dmrt1-201	Smim10l2a-201
Gm13691-201	Hcrtr1-201	Mical2-202	Nkx3-2-201	Sp5-201	Gm14866-201
Gm13697-201	Tdrd5-201	Micu1-212	Lyve1-201	Slitrk1-201	Olfr1564-203
Gm13693-201	Hmgn2-201	Tmem100-201	Hlx-201	Tdh-201	Tph2-201
Gm13694-201	Fbln2-202	Sorcs2-201	Mamdc2-201	Stk38l-202	Sulf1-201
Gm13698-202	Ptk2b-201	Ptk2b-201	Foxf2-201	Plxdc1-201	Rnf152-202
Gm13696-202	Ctrb1-201	3110035E14Rik-201	Hnf1b-201	Aldh1b1-201	Wdr95-201
Cobll1-205	Smc1b-201	Hsd3b1-202	Gpr17-201	Cbs-202	Tmem174-201
Gm3376-202	Tcea1-ps1-201	Gatm-201	Prrx1-201	Wnt6-201	Pik3r1-201
Akap7-203	Slc1a5-202	Gatm-206	Foxp2-204	Fam129a-202	Sall3-201
Hoxa9-201	Galnt6-202	Stc2-201	Ddc-201	C1qtnf7-202	Ppp1r18-204
Kif3c-205	Gsg1l-201	Gstm6-204	Flna-207	Rps15a-203	Afmid-204
Hoxa5-201	Adora1-201	Plxnb3-201	Ntrk3-202	Plcg2-201	Gm5850-201
Nefl-201	Cpeb1-201	Gas7-202	Ccnd1-201	Dclk1-203	Sohlh1-201
Mybpc1-202	Socs2-201	Pak3-207	Syt1-201	Tcl1-201	Pld1-201
Gata2-202	Chp2-201	Gm13031-201	Hebp1-201	Fbxo15-204	Tns4-201
Fst-201	Ctcflos-203	Osr2-201	Tnc-203	AU018091-201	Hdc-201
Dpp10-201	Tex11-201	5830411N06Rik-202	Isl1-203	AC245272.3-202	Prcd-201
Cldn9-201	Tex14-201	Cst9-201	Apbb1-205	Hsf2bp-201	Zmym3-214
Scnn1g-201	Spsb3-209	Diras2-201	Fignl2-201	Gm10324-201	Lmo7-205
Tgm5-201	Aldh1a7-201	Flna-207	Hoxa5-201	Epx-201	Egfl6-201
Got2-ps1-201	Pdyn-201	Ntf3-203	Alx1-208	Btg3-201	Rasgrp1-207
Ptx3-201	Fam169b-201	Gstm2-201	Lamc2-203	Gpc6-201	Alg13-212
Cdh10-202	Gm10182-201	Sel1l3-201	Gapdh-206	Sprr2d-201	Psen2-204
Car4-201	Ddx4-202	Ppp1r16b-201	Gnb1-208	Ap3b2-201	Ryr2-203
Tbx18-201	Tmem181b-ps-201	Ptgds-205	Spp1-202	Fkbp6-201	Myo5b-203
Cthrc1-201	Ptgds-205	Cltb-201	Scg5-201	Mov10l1-201	Vmn1r188-203
Cthrc1-206	Rps2-201	Asap1-216	Prox1os-201	Gm14038-201	Cgn-201
Plet1-201	Gatm-201	Dok7-203	Col11a1-201	Adora1-201	Igfbp2-201
Cwc22-205	Gatm-206	Atp1a3-201	Magt1-203	Pim1-201	Cfh-204
Prrx1-205	Serpinb1a-201	Tesc-206	Ddr2-201	Gm17232-201	Itk-201
Ndufs2-206	Paip1-208	Frmd4b-209	Tll1-201	Dppa2-201	Prx-204
Tbx3-201	Casq2-201	Mageb4-201	Tbx3-203	Ppara-201	RF01962.1-209
Rpl34-ps1-201	Tle6-210	Lzts3-203	Prss23-204	Gldc-201	Cgn-203
Pcsk9-201	Gm2694-205	Cspg5-205	Raet1e-202	Rhox6-202	Fgfr2-207
Ppp1r18-204	Dppa5a-201	Mapk13-201	Angpt1-201	Rhox6-201	Coro2a-201
Rspo2-203	C430049E01Rik-201	Uba1y-201	Lrrtm1-202	Nr6a1-201	Creld1-202
Spp1-202	Hmgb1-206	Col18a1-202	Rgs5-201	Sox2-201	Ryr1-208
Satb1-213	Slmap-211	Txlna-207	Sim1-201	Eps15-208	Porcn-206
Irgm2-201	Mro-201	Lpp-202	Crabp1-201	Amd2-201	Abhd3-203
Prox1os-201	Krt222-201	Tpm1-216	Asic4-201	Dclk1-207	Dsc2-202
Kif12-203	Chtop-207	Tacc1-202	Grhl2-201	Dppa5a-201	Akr1c18-201
Cldn7-201	AI427809-203	Plcb2-206	Srsf2-203	Pdxdc1-215	Runx1-202
BC030500-201	Dlgap1-201	Paqr5-202	Alx3-201	Myl1-202	E330013P04Rik-202
Nr2f1-201	Eps8-202	Gm47200-201	Tead2-202	Gm9748-201	Sulf1-203
Slc12a1-203	Pla2g5-203	Col4a4-201	Foxd2os-201	Med14-201	Arhgap44-203
Pamr1-201	Hormad1-201	Ldlr-202	Hoxa4-201	Fndc5-201	Cdkn1c-205
Hpn-202	Srpx2-201	Aldh1a1-201	Rtl3-201	Tmem44-206	Nmur2-201
Mybpc1-201	Col9a1-201	Col27a1-201	Gm6356-201	Map7d2-204	Ecel1-201
Ror1-201	A830035A12Rik-201	Dnpep-201	Sox9-201	Prdm14-201	Fgfr2-215
0610040J01Rik-201	Adhfe1-201	Acer3-202	Mal-202	Paip1-203	Stra8-202
6330403K07Rik-201	Tuba3a-201	Zfp536-202	Tcf12-215	Gprc5b-201	Colec12-201
Iigp1-202	Trank1-201	Vmn1r90-202	Clstn2-201	Foxr1-202	Drp2-201
Ank3-204	Zbtb44-205	Cltb-202	Prox1-202	Gapdh-202	Alg13-210
Rspo3-201	Sox15-201	Tmem63a-201	Cthrc1-201	Banf1-202	Cpa2-201
Cpm-201	Rbm44-201	Afap1l2-202	Foxp2-207	Trim12a-203	Plch1-213
Supt7l-204	Pla2g4e-201	Gpm6b-209	Cthrc1-206	Stra8-203	Taf7l-201
Moxd1-201	Nbr1-205	Sept11-208	Foxp2-213	Rpl29-203	Tnfrsf19-203
Fam214b-205	Rapgef6-201	Tnnc1-202	Hbb-bh1-201	Ddx58-201	6330411D24Rik-201
Cds2-201	Vars-210	Rcan1-201	Prss23os-202	1700061G19Rik-201	AL607074.1-201
Chst13-201	Ltbp4-205	Slc13a2-201	Zdhhc24-203	Rpl34-201	Runx1-203
Sfrp2-201	Pdxdc1-215	Adamts9-203	Frmd4b-209	Tdrd5-201	Espn-215
Clcn3-205	Gapdh-203	Zmym6-202	Mink1-204	Ino80e-212	Pdzd7-203
Adtrp-204	Foxs1-201	Cnmd-201	Vcan-206	Ifitm1-202	Ccdc61-207
Tmem59l-201	Slc25a31-201	Padi2-203	Gm7984-201	Cenpl-208	Cacna1d-209
Ptpru-203	Dppa3-202	Hdac7-207	Gm7292-201	Sema5b-201	Gemin8-202
Pdzrn4-201	Rcan1-201	Bricd5-201	Hand2-201	Mageb4-202	Pde1a-201
Slc22a3-201	Jade1-204	Pak3-201	Diras2-201	Ctcflos-203	Hpse-201
Mgam-206	Ank3-202	Kcns3-202	Hey2-201	Stard7-205	Gas6-201
Grik2-202	Nr4a1-201	Egflam-202	Cntn3-202	Serpinb6a-201	Prkcd-207
Prom1-203	Ppp1r16b-203	Vmn1r77-203	Sema6a-206	Isl2-201	Emx2-201
Pcdh7-201	Adgrg1-207	Dtx4-201	Cdh18-203	Tuba3b-201	Sugp2-214
Gm266-201	Gpm6b-212	Aldh6a1-204	Gli1-201	Fam169b-201	M1ap-201
Rhcg-201	Socs2-202	Cspg5-203	Synpo-206	A830035A12Rik-201	Ccne2-207
Fras1-201	Tesc-206	Etv1-212	Pcdhgb7-201	Csgalnact1-201	Micall2-204
Prrx1-204	Tcl1-201	Arhgef2-219	Pax1-201	Ifitm1-201	Cdh9-201
Vmn1r43-202	Gpc6-201	Robo1-201	Stra6-201	Parp12-201	Asns-201
Frmd4a-219	Uba1y-202	Dusp15-203	Cobl-202	Cbr3-201	Hmgcs2-202
Hoxa10-202	Cdh23-203	Stox2-208	Cldn1-201	Gm29340-201	Gm44753-202
Hebp1-201	Gpat2-201	Gm7049-201	1600014C10Rik-205	Hdc-201	Dnah8-201
Car14-201	Gjb3-202	Prss35-201	Gpd2-207	Osbpl1a-202	Ifitm1-201
Dnmbp-203	A530016L24Rik-201	Zfy1-202	Cxcl12-203	Pla2g10-201	Rhox6-201
Npnt-205	Atp1b2-204	Fam189a1-201	Epyc-201	Rnf17-201	Rhox6-202
Edil3-202	Rapgef6-210	Masp1-201	Bmp4-201	Serpinb6b-203	Phf19-201
Mmrn1-203	Ddit4l-201	Vstm4-201	Tbx3-201	Gng13-202	H2-Q4-202
Muc1-201	Bricd5-202	Krt79-201	Uncx-201	Rps2-206	Ptpn4-203
Slitrk6-201	Cpeb1-203	Pak3-209	Ilf3-208	Rpp25-201	Fam129a-201
Olfr1388-202	Mov10l1-201	Proc-201	Cdh6-201	Rhox2a-201	Dlgap4-206
Coro1a-201	Gstm2-203	Prss53-201	Sostdc1-201	Bmp2-201	Pafah1b1-205
H2-DMb2-201	Tmem44-206	Hcrtr1-202	Ntrk3-205	Dlgap3-201	Rhox9-201
Hoxb7-201	Chd9-206	Me1-201	Dact1-201	Asns-201	Rhox9-204
Foxc1-201	A530016L24Rik-202	Olfml3-201	Pamr1-201	Syce2-204	Ano1-203
Dpp6-202	Gas7-202	Gas7-204	Gpr85-203	Pcsk6-202	Kcnh3-201
Scara3-201	Etnk2-201	Heyl-201	Mmp16-201	Nmt2-202	Reep1-201
Tfap2b-202	Tgif2-ps2-201	Trac-202	Prdm16-202	Nanog-202	Sprr2a2-202
Fap-209	5830411N06Rik-202	Ptch1-201	Slc16a12-201	Serpinb6b-202	Ints6-204
Sec11a-202	Trank1-202	Grb14-208	Megf10-201	Itga6-201	Mbnl3-203
Aldh1a2-201	Nr5a1-202	Robo2-209	Tacstd2-201	Arx-201	Tmem56-201
Thbs3-201	Hsd17b1-201	Gm4297-201	Ntrk2-202	Gjb3-202	Rnaset2b-202
Efna3-201	Hormad1-202	Gm48795-201	Gap43-201	Atp5g1-203	Itpr2-202
Wnt4-201	AU015836-202	Ilf3-208	Has2-201	Liph-201	Ctxn3-201
Cd248-201	Stc2-201	C1qtnf3-202	Flrt3-201	Ccdc182-201	1700013H16Rik-201
Gm28437-201	Pianp-201	Smarca2-203	Grik4-201	Ccdc182-202	Hand1-203
Dach1-201	Gm42031-201	Trim47-206	Gm14226-201	Gatad2a-206	Cep85-202
Tmem52b-201	AC154506.1-201	Oxr1-203	Twist1-201	Epb41l4b-201	Ces1h-201
Rdh10-201	Dmrt3-201	Plod2-201	Sfrp2-201	Zc3hav1-201	Plch1-207
Ocln-202	Chchd10-201	Rasgef1c-203	Adamts20-204	Apobec3-208	Rnf43-202
Plet1os-202	Piwil2-201	Gm28811-201	Nog-201	Papln-202	Fam196b-201
Hoxc8-201	Serpine2-201	Myadm-201	Ttbk2-202	Hspa8-204	Ifnar1-201
Gm28661-201	Krt79-201	Gm41192-201	Gm12915-201	Foxh1-201	Slit2-216
Foxp2-201	Kndc1-204	Zar1-201	Fign-201	Lzts1-204	Cib2-201
Hoxb8-201	Kcnh1-202	Kcnh1-202	Pitx2-207	Tcl1-202	Myo5b-201
Stac2-201	Smarce1-206	Mybpc3-202	Pou3f3-201	Trank1-201	Fndc5-201
Dach1-202	Foxr1-203	Hic1-201	Efna5-201	Sohlh2-201	Sbspon-201
Hoxc10-201	Dppa4-202	Pak3-205	Dach2-205	0610039K10Rik-202	Slc39a14-201
Abcc1-203	Plcb2-202	Spry1-203	Ccnt2-201	Gm10499-202	Slc41a3-201
Hoxb3-202	Papd5-202	Adgrl2-212	Akap12-203	Best1-201	Gm14322-201
Cdh16-201	Cenpl-208	Acap1-202	Col9a3-201	Hmgcs2-202	Csgalnact1-201
Epha7-201	Dppa3-201	Nuak2-201	Mecom-206	Phlda2-201	Cntn4-202
Fxyd2-202	Igfbp7-201	Tspan11-201	AV026068-203	Rhox5-202	Agtr1a-201
Prss8-201	Wnt3-201	Pltp-202	Hoxb3-202	Rhox5-204	Kcnip1-201
Synpo2-203	Hsd3b1-202	Cnga1-205	Ano1-201	Grip1-211	Npr2-205
Lix1-201	Tsku-202	Tox2-204	Cdh16-201	Kcna6-204	Ccdc182-201
Twist2-201	Foxr1-201	Dkk1-201	Cttnbp2-203	Stag3-201	Ccdc182-202
Uncx-201	Parp12-201	Gsg1l-201	Corin-202	Taf4b-201	Fam160a2-206
Dpp4-201	Btg3-201	Grb14-201	Efemp1-203	Trnp1-202	Rgs2-202
Plekha5-214	Mybpc3-203	Robo2-201	Cdh19-201	Mthfs-201	Ash2l-202
Cpn1-201	Kcns2-202	Vcam1-201	Megf11-203	Rpl34-205	Fgfr2-227
Ecm1-204	Rasgef1b-209	Lamc3-201	Plekhg1-201	Zfp385b-203	Sh3d21-205
Gm10925-201	Atp1b2-202	Smtn-202	Rarb-201	Ccdc172-201	Zglp1-201
4932441J04Rik-202	Mtif3-203	Clca3a1-202	Rgs4-201	Alg13-210	Myl9-201
Cnn1-205	Rps26-ps1-202	St3gal4-201	Hoxc5-201	Ifitm3-201	Myo5b-209
Kcnj8-201	Fkbp6-201	Inhba-202	Elavl2-209	Irgm2-202	Nek3-202
Gm7336-201	Sycp3-203	Kcnj3-202	Skil-201	Arrdc4-202	Brwd1-209
Gm2564-201	Fdxr-201	Rexo4-202	Gm24080-201	Hsf2bp-202	Actr6-201
Eno3-201	A330041J22Rik-201	Tspoap1-201	Rusc1-201	Dhrs7-201	Gdpd2-204
Slc1a3-201	Gm26880-201	Atp1a3-205	Sec11a-202	Fam196b-201	Vrtn-202
Foxd2-201	Xpo7-206	Papss2-201	Rccd1-202	Pmm1-201	Lhpp-201
Cpb2-201	Amd2-201	Ppp2r1b-211	Lzts3-203	Mlst8-202	Pitpnm3-201
Cdkn1c-201	Asap1-216	Tspan15-201	Bmper-201	Adamts19-201	Nr2e3-202
1110059E24Rik-208	Ubc-203	Vcan-201	Hkdc1-201	Fam169a-201	Haao-201
Igf2-205	Bcor-202	Bcar1-203	Postn-201	Gdf3-201	Csgalnact1-203
Fes-208	Trim12a-203	Col9a3-202	Scrn1-201	Tfap2c-203	Gm12896-201
Zdhhc24-204	4933402E13Rik-201	Slc34a2-201	L1cam-201	Ifi27-205	Ifitm1-202
Fibin-201	Gstm6-201	Spry4-201	Adamts18-204	Gpr37-201	Hdac7-206
Gpd2-207	Rnd2-201	Rab20-201	Ddr2-203	Nfatc2-204	Ttc38-203
Gm13256-201	Trim47-201	Scara5-201	1110059E24Rik-208	Cyct-201	Tkt-209
Adamts1-201	Igsf23-201	Robo2-211	Ibsp-201	Necab3-201	Cacna1d-202
Dcdc2a-202	Col4a4-201	Rasl12-201	Rpl34-ps1-201	Bace2-201	Vgll2-201
Tmem132c-201	Mael-201	Hsd17b1-201	Dcdc2a-202	Cst8-201	Gm1604a-201
Gpr45-205	Tpd52-206	Slc38a5-201	Tmem229a-201	Gapdh-203	Slc28a1-201
Bmf-201	Hcrtr1-202	Grem2-201	Dnmbp-203	Shbg-201	Krt20-201
Brinp1-201	Gm43305-201	Ctgf-201	Gm28437-201	Kank3-201	Arhgap29-207
Postn-204	Nodal-201	D130058E05Rik-202	Hdac7-207	Slc35f2-201	Apbb2-210
Angpt2-201	Liph-201	Robo2-210	Dgkk-202	Trap1a-201	Laptm4b-201
Akr1c18-201	Sel1l3-201	Ung-205	Spock3-201	Sh2d4a-201	Gm5182-201
1700011H14Rik-205	Nfatc2-201	Efhd2-201	Avpr1a-201	Psma8-201	Rara-207
Hist3h2ba-201	Islr2-201	Hk1-203	Tmem52b-201	Arx-202	Kcnq1-201
Hoxa11-201	Rxra-206	Plcb2-204	Dpysl3-201	Jade1-204	Osbp2-201
Hoxd1-201	Cep85-207	Fbln2-206	Scnn1g-201	Adgrg1-201	Ift140-207
Scnn1b-201	Col9a3-205	Etv1-203	Oxr1-203	Stim1-201	Cfap161-201
Wfdc2-201	Tmprss13-201	Fam46c-201	Tnc-204	Prdm1-201	E330013P04Rik-203
Osr1-201	Nt5dc3-201	Pcsk5-202	Habp2-201	Fkbp6-203	Prr36-201
Hkdc1-201	Adora1-202	Nedd9-202	Gm27530-201	Hormad2-202	Cntnap5a-201
Foxc2-201	Mical3-201	Sfrp4-201	Postn-204	Pld1-201	Gm14493-201
Zbtb45-202	Cspg5-201	Rnf220-205	Pdzrn3-201	Rhox5-201	1700061G19Rik-201
Rarb-202	Wfdc1-201	Gstm1-202	Sgpp2-201	Mbd2-202	Tbc1d4-202
Ift140-207	Plcb2-206	Kcns2-202	Hoxb5os-202	Rhox5-203	Inpp5k-207
Hoxb6-202	Itga11-201	Mink1-204	4930474H06Rik-201	Gm8909-203	Soat1-201
Gap43-201	Elmo1-201	Tec-203	Ror1-201	Med25-207	Ttc38-202
Col12a1-201	Ttc3-203	Itga9-202	BC030500-201	8030474K03Rik-202	E330013P04Rik-201
Lbp-201	Scgn-201	Gpx3-201	Gm3739-201	Gnpda1-201	Axin2-201
Hoxa4-201	Rpgrip1l-204	Tead2-202	Hoxc8-201	Tex15-201	Mapk8ip2-201
Rbl2-208	Mical2-202	Col27a1-206	Cwc22-205	Pnldc1-201	Klf17-201
Kif12-202	Plac9b-203	Csrnp1-204	Lpin1-201	Pla2g16-203	2010204K13Rik-202
Kctd14-204	Rpl34-205	Gpn3-204	Bcl11a-202	Pcgf5-203	Sc5d-202
Vav3-202	Gm4779-203	Tmem52-201	Myom1-202	Pde4a-203	Dock4-207
Gm26771-201	Nop16-202	Cped1-202	Pth1r-201	Col9a1-201	Cpeb2-204
Tpm1-203	Ino80e-212	Clu-201	0610040J01Rik-201	Trpm5-207	Cpt1b-201
Epb42-203	Tdrd5-204	Kansl1-205	Fzd4-201	Glrx2-212	Kidins220-210
Gm13727-201	Susd3-202	4930550L24Rik-202	Rhcg-201	Tdrp-201	Camkv-201
Arhgap44-203	Pard3-210	Lrrn3-201	Tpbg-201	Cntn4-208	Dab1-202
Gm3739-201	Hsf2bp-201	Micu1-210	Gfra1-209	Mlf2-201	Hmox2-202
Lhfp-201	Bst2-201	Gjb1-203	Hoxb5-201	Cgn-201	Ppara-201
Hoxa3-201	Fam46c-201	Ptk2b-203	Gpatch2-208	Zic3-201	Fam83g-202
Sdhb-203	Gapdh-202	Stox2-201	Twist2-201	Kcng4-201	Gm28661-201
Slc39a8-201	Mlf2-201	Ripor2-206	Mal2-201	Elavl2-204	Itgb4-202
Meis1-201	Afap1l2-203	Dusp6-201	Slc22a3-201	Plcd1-203	Gm21083-201
Gal3st4-202	Gem-202	Rerg-201	Shisa3-201	Rps26-ps1-202	AC244695.1-201
Cadm3-201	Afap1l2-201	Ptp4a3-201	Sytl2-211	Rex2-201	Ahctf1-203
Mia3-201	Fastkd3-204	Akr1b8-201	Pnliprp2-201	Tmem114-201	Adarb1-203
Zfp691-204	Map7d2-203	Entpd5-205	Tinag-201	Pls1-201	A230005M16Rik-201
Gm24080-201	Nrbp2-207	Gfra1-203	Fzd1-201	Eps8-201	Taf7l-202
1700011H14Rik-203	Lockd-202	Tmem33-203	Robo1-201	Src-204	Arhgef19-201
Sema4d-202	Eps8-203	Kcnd3-202	Micu1-212	Kcnt1-213	Casc4-201
H19-202	Aldh3b1-201	Hapln3-202	Tmem63a-201	Klf5-201	Tle3-208
Frzb-201	Gm43240-201	Pde2a-209	Ptn-201	Cib2-201	Gm26740-202
Ddc-201	Rpl3-201	Hhip-202	Chrm2-202	Lrrn1-201	Olfr124-204
Hmga1-203	BC034090-201	Bhlhe40-201	Tox-201	Klf8-201	Zfp703-202
Scd1-201	Miox-201	Paqr5-201	Tbx20-201	Amhr2-201	Olfr720-203
Zfp663-201	Taf4b-201	Zfp935-204	Glipr2-202	Cdx2-201	2210407C18Rik-201
Mcoln3-201	Robo2-211	Btbd8-208	Fam19a2-201	Sox15-201	Entpd2-201
Cldn3-201	Sycp1-202	Eps8-201	Prrx1-205	Nexmif-201	Eif4g1-207
Gm44732-201	Dnmt3a-215	Gen1-205	Ppfibp1-209	Nanog-201	Tmem178-201
Asic4-201	Plxnc1-201	Vcan-203	Cxcl12-204	Prcd-201	Madd-211
Lrp2-201	Etv5-201	C430049E01Rik-201	Soga3-201	Tex11-201	Smpdl3b-201
Pid1-201	Mageb16-202	Cited1-201	F13a1-202	Kctd14-206	RF01962.1-211
Per1-206	Mapk13-201	Gm42517-201	Tubb3-201	AA414768-201	Stx11-201
Cldn1-201	Pcsk6-202	Mdfic-201	Erc1-201	Zfp473-204	Kcnt1-213
Jag1-201	Atp5o-203	Mdfic-207	Gulp1-201	1700013H16Rik-201	Dnaaf3-201
Igf2-208	Stard7-205	Anapc16-202	Rnf112-203	6330411D24Rik-201	Rasgrp4-209
Zcchc18-202	Trap1a-201	Nr4a1-201	Gm20775-201	AL607074.1-201	Gm7666-201
Cblc-201	Fbxo34-211	Sema4a-214	Pcdhga11-201	Fastkd1-201	Gabra4-202
Syt11-201	Kif19a-201	Osr2-204	Adamts18-202	Foxr1-203	Kcng1-202
Olfr338-201	Arhgap6-205	Plppr5-201	Nr2f1-201	Uba1-202	Gldc-201
Cdkn1c-202	Ddah1-202	Itga9-201	Prss12-201	Cacnb2-214	Hmgcs2-201
Glb1l2-202	Itpripl1-201	Duox2-201	Gata5-201	Porcn-201	Aldh1b1-201
Msx1-201	Ppp1r16b-201	Fam19a5-201	Igfbp3-201	AI506816-205	Mid1ip1-201
Gm11532-201	Pcsk6-201	Frmd4b-201	Hoxb6-202	Gm26885-201	Pank1-202
Prss23-201	Rhbdf2-201	Tpd52l1-204	Mfap4-202	Arl14epl-201	Gm16401-201
Id3-203	Grem2-201	Hapln3-203	Jakmip2-201	Aldh3b1-201	Col12a1-203
Dmtn-208	Dnd1-201	Sparc-209	Rxfp3-201	Sptbn2-201	Akr1c14-202
Pcdh19-202	Gas7-204	Smtnl2-202	Asb4-201	Sybu-206	Clcn5-202
Tspan12-201	Dhx33-201	Mms19-202	Lrrtm1-203	Nlrp12-201	Ctdnep1-205
Sdk2-201	Schip1-203	Vcan-206	Pax2-203	Nlrp12-203	Rapgef3-207
Svopl-202	Rbmxl2-201	Ptgds-202	H2-DMb2-201	Bst2-201	Drp2-204
Arhgap24-201	Aebp2-203	Phb-201	Adam23-201	Spp1-201	Tfap2c-201
Tagln-201	Zfp874a-203	Smarca2-216	Hoxa7-201	Dusp5-201	Ppcdc-203
Pth1r-201	Cx3cl1-201	Slc35c2-201	Runx2-203	AU022751-202	Gm15543-201
Sft2d1-207	Fkbp6-203	Ahsg-201	Gm7336-201	Aldh1a7-201	Cdkn1c-204
Pcdh20-201	Tor1aip1-207	Gmpr-201	Mapk15-201	Porcn-202	Phc1-211
Irx2-201	Zfp106-205	Col9a1-202	Prrx1-204	Stx11-201	Zfp462-201
Rnf152-202	Adad2-201	Mal-202	Olfr1388-202	4930563E18Rik-201	Npnt-202
Adgrg2-204	Fam83f-201	Synpo-206	Tgm5-201	CN725425-202	Fat4-201
Sim1-201	Plcb2-204	BC034090-201	Fli1-202	Olfr1156-202	Zfp692-202
Foxp1-204	Ppig-205	Pnmt-201	Mecom-202	Mkrn1-204	Atp6ap1l-201
Adgrg3-201	Zmym6-202	Ankrd6-203	Brinp1-201	Lin28a-201	Hs3st1-201
Cdh2-202	Rgn-201	Tbx2-201	Col25a1-202	Ddit4l-201	Dab1-207
Phactr2-203	8030474K03Rik-203	Egflam-201	Cpb2-201	Mageb16-201	Gng13-202
Stra6-202	Arx-201	Exog-203	Slit3-201	Clec2l-201	Dclk1-211
Hoxa6-201	Mybphl-201	Jakmip2-201	Gm13727-201	Tmem174-201	Parp8-207
Celf4-201	AC166341.1-201	2610035D17Rik-201	H2-D1-202	Hmgb1-206	Arhgap29-205
Pou3f3-201	Slc29a1-204	4933407K13Rik-203	Nlgn3-203	Gjb3-201	Ica1-212
Hoxa7-201	Cpeb1-209	Steap4-201	Alx1-205	Scml2-205	B3gnt7-201
Csf1-202	Mamld1-201	Islr2-204	Kcnj16-202	Phf19-201	Dapk1-201
Gm29100-201	Clu-201	Ldah-206	Ackr3-201	Hmgb1-210	Dmrta1-201
Tagap-201	Lgr5-201	Adamts2-201	Pcdh7-201	Actr3b-201	Med14-201
Foxp2-207	Gem-201	Ralgps2-204	Pkp3-201	Atp2b3-201	Gnal-201
Gm17473-201	Gpn3-204	Ubap2l-205	Lima1-202	Dppa4-201	Hvcn1-202
Ibsp-201	Gm42517-201	Pkdcc-204	Adamts18-205	Pgbd5-204	Add3-203
Wfdc15b-202	Gprin3-201	Cdh17-201	Scnn1b-201	Tdrd5-204	Atf1-207
Mpo-203	Tsku-203	Bgn-201	Gm3411-201	Mreg-201	Kif3c-205
Traf3ip1-202	Afap1l2-202	Mag-203	Slit3-202	Lck-202	Ppp1r26-205
Itgb4-202	Vnn1-201	Mtcl1-210	Ino80e-215	Slc25a18-201	Micu1-205
Cdh18-203	Aldh6a1-204	Crhr1-201	Tmem30b-201	Copa-202	Scd1-201
Mal2-201	Elavl2-204	Msantd3-201	Disp2-201	Hpcal1-201	Gm33543-202
Pdzrn3-201	Tspan15-201	6030408B16Rik-201	Hand1-203	Mark2-221	Lin28a-201
G6pc2-202	Mtss1-202	Serpina3b-201	Gm2564-201	Mettl23-201	Olfr1062-203
Ptger4-201	Shbg-201	Card19-202	Sptssb-201	Coq8a-201	Kcnh4-201
Serinc2-201	Adcy7-203	Erbb3-201	Adra1d-201	Apobec3-201	Kitl-202
Cnn1-201	3110035E14Rik-201	Acap1-201	Tagap-201	Slc1a5-202	Gm43352-201
Astn1-201	Slc13a2-201	Gsta2-203	Tec-203	Igfbpl1-201	Tacr1-201
Elof1-204	Htra1-201	C1qtnf3-201	Gfra1-203	Sgpp1-201	RF01962.1-210
Lamc2-203	Serpine2-204	Gfra1-209	Tpm2-202	Lbx2-201	Tmc1-201
Foxp1-224	Tbx4-201	Gtf2ird1-229	Apbb2-201	Atp1b2-201	Tmem171-202
Spink1-201	Inhbb-201	Tagln2-202	Fat3-205	Ablim3-201	Adgrl3-226
Car3-201	Il11ra1-206	Adhfe1-201	Gm5436-201	Lef1-203	Cdkn1a-202
Meis2-202	Clca3a1-202	CT573016.1-201	Gm26771-201	Adora1-202	Ablim3-202
Hdac1-205	Nup210-202	Bex2-201	Adamts15-201	Lrp8os2-201	Gdpd2-205
Emid1-201	Akr1b8-201	Acer3-204	Cyr61-201	Dennd1c-201	Slc7a2-202
Tpm2-202	Ints11-202	Col9a3-203	Phactr2-203	Scarb1-209	Ptpn4-201
Traf3ip3-201	Pdzd2-205	Gpd2-207	Bmp5-201	Pus1-201	Plxna4-201
Lamb3-201	Scarb1-201	Optn-205	Tbx3-206	Mkrn1-201	Hdac4-208
Postn-203	Zfp979-202	Anapc7-203	Efemp1-201	Hadhb-202	Olfr1263-202
Dpysl3-202	Cela3b-201	Scarb2-201	Map3k7cl-201	Eef1g-201	Morc3-206
Cdkn1c-205	Rasef-201	Etv1-206	Bmx-202	Gm6871-201	Dclk1-207
Mmrn1-201	Mapk4-202	Nipal1-201	Gfra3-201	Mtss1-202	Fam134b-203
Pcdh7-202	Gm8909-203	Hapln3-201	Kctd14-204	Prr19-201	1700097N02Rik-201
Tenm3-201	Pla1a-201	Jsrp1-201	Efna3-201	Jakmip1-201	Gm5851-201
Hmgxb4-202	St3gal4-201	Cnmd-203	Adh1-202	Cnn3-203	Cdkn1a-201
Slc6a13-201	Slc29a1-213	Gm15270-201	Foxp4-204	Tst-201	Klhl5-204
Car7-201	Gstm7-201	C1ql2-201	Gm2163-201	Morc1-201	Ifit1bl1-201
Bmpr1b-201	Tex11-202	Slc6a14-201	Igfbp3-202	Ooep-201	Snca-202
Epb41l3-202	Rpl34-201	Cage1-201	Tedc1-204	Smoc1-201	Trnp1-202
Sp6-202	Mecp2-203	Gm28819-202	S1pr3-201	Gm14064-201	Aqp3-201
Rxfp3-201	Lgr4-201	Rnf181-202	Synpo-210	Slc25a25-201	Rrnad1-211
Cpm-204	Dapk3-201	Rnf181-223	Acta1-201	Wnt5b-201	Fam214b-205
Kcnh2-202	Tspan32-201	Efhd1-201	Plagl1-202	Ldhb-201	Baiap3-202
Rnf43-201	Ttyh1-203	Gpc3-201	Pcdh7-203	Phc3-206	Olfr1346-203
Ano1-203	Nrbp2-208	Myh14-201	Hoxa7-202	Ash2l-204	Pcsk9-201
Eps8l2-201	Gm1840-201	Slc9a2-201	Fras1-201	Cgn-202	Cd83-201
Sema3c-201	Zfp985-201	Rnf181-201	Nrp1-201	Il11ra1-206	Adam8-204
Meis2-203	Mkx-201	Rnf181-218	Slc39a5-201	Isx-201	Npnt-205
Nkd1-202	Pak3-207	Ripor2-203	Zcchc18-203	A230005M16Rik-202	Cdh9-202
Phldb1-215	Hsd17b3-204	Gm27820-201	Scn5a-201	Zfp746-206	Svopl-202
Dach2-205	2010300C02Rik-203	F3-201	Grb7-201	Mplkip-202	Dclk1-205
Arhgap24-204	Zc3hav1-201	Adh1-202	Stmn3-201	Pax6-204	Hook1-207
Clmp-201	Rpl29-203	Chst1-201	Frmd4a-213	Aldh1a1-201	Cdkl2-201
Hacd4-203	Slc29a1-223	Fgf10-201	Cldn6-201	Dnaaf3-201	Anapc5-216
Kif1c-203	Calm3-204	Mical2-201	Gm29100-201	Thsd7b-202	Cntn4-208
Esrrg-201	Chchd10-202	Dact1-201	Pcsk1n-201	Trank1-202	Gprc5a-201
Postn-206	Tnc-201	Slco3a1-202	Tfap2b-202	Thyn1-201	Tgm3-201
Ing1-204	Dusp4-201	Pmaip1-201	Car4-201	Xlr4a-201	Emb-201
Col1a1-201	Mbnl1-212	Gpa33-204	Dach2-206	Gm1840-201	Arhgap29-201
Crispld1-201	Pou5f1-201	Fxyd6-201	Prickle2-201	Dnmt3a-206	Csrnp3-201
Ccdc80-202	Mms22l-210	Pcdh8-201	Meis2-205	Tor1aip1-207	Papln-201
Hoxc9-201	Slc45a4-202	Armcx2-202	Popdc2-201	Nt5dc3-201	Tead2-216
Ecm1-208	Ccl17-201	Col4a1-201	4932441J04Rik-202	Ttyh1-201	Map3k12-205
Cxcl12-203	Rasl12-201	Tnfrsf12a-201	Cpn1-201	Txlng-201	Cdkn1c-203
Cela1-201	Slc34a2-201	Hck-203	Pth1r-202	Slc4a11-201	Mag-201
Meis2-201	Pak3-210	Gja5-201	Flrt3-202	Rgn-201	Aldoc-202
Zfp691-201	Rasgef1b-201	Gm16559-201	Ppp1r12a-201	Fat1-201	Zbtb7b-203
Anks1b-201	Olfr1258-203	Khdc3-201	Slc12a1-203	Csgalnact1-203	Fam129a-205
Pcdh7-203	2610035D17Rik-201	Cacna1g-202	Tmtc2-201	Gm2044-201	Dclk1-214
Fat4-201	Pak3-209	Cnn2-202	Thbs3-201	Gna14-201	Prrt4-201
F2rl1-201	Gm19553-201	Tcf21-201	Gcnt1-203	Rnf17-202	Clec2l-201
Cdh8-203	Itih5l-ps-201	1110032F04Rik-201	Dcc-201	Gm3448-201	Itgb4-201
Rgl3-201	Abcg1-201	Kif19a-201	Dact3-201	Nefh-201	Rbl2-208
Tspyl2-203	Col14a1-201	Fgf16-201	Eya4-202	Ube2l6-201	Luc7l2-211
Col11a1-201	Prkch-203	Cyr61-201	Sytl2-210	Elfn1-201	Ano1-207
Efemp1-203	Stim1-201	Tspan15-202	Fbln5-203	Gm4779-201	Smyd1-202
Gjb1-201	Gjb1-203	Robo2-204	Clstn2-202	Tmie-201	Alg13-202
Mamdc2-201	Zc3h7a-204	Gm35065-201	Hoxa9-201	Naip5-201	Rrad-201
D030045P18Rik-201	Sfrp4-201	Glipr2-202	Ndst3-206	Pmm1-206	Neu3-201
Postn-201	Dok7-201	Gm20811-201	Dnpep-201	Porcn-205	Gjb4-201
Hoxc8-202	Fer1l4-206	Tpm1-213	Hoxa6-201	Rgs11-208	Mid1ip1-202
Unc13d-203	Asz1-201	Otof-205	Cadps-201	Hmgb1-208	Dock4-211
Pbx1-205	Stx5a-219	Wnt3-201	Unc5c-202	AU015836-202	Necab3-201
Tagln3-201	Entpd5-201	Col27a1-205	2900026A02Rik-201	Rnf212b-201	Tbc1d25-201
Asb4-201	Gata4-201	Gm29044-202	Hoxb7-201	Lef1-201	Cpne5-204
Irx1-201	Gm9347-201	Gm29209-201	Cux1-212	Tnfrsf19-203	Kcnk10-201
Gm15998-201	AU018091-201	Arf4-203	Fcgr3-203	Gm10244-202	Mdm1-202
Plch1-203	AC245272.3-202	C7-201	Mecom-212	Ly6e-210	Man1a-203
Crlf1-201	Dnmt3a-204	Atp6v0a1-210	Bcl11a-201	Zyg11a-203	Clasp1-216
Khdrbs2-201	Tuba3b-201	Syt17-201	Adarb1-208	C1qtnf7-201	Zfp277-201
Gm48529-201	Zc3hav1-203	Prdm16-202	L1cam-203	Gm3468-201	Cntn5-202
Dpysl3-204	Map3k15-201	Aamdc-202	Tbx3os1-201	Taf7-201	Dapk1-202
Nkd1-201	Cyp11a1-201	Hsd17b3-205	Olfml3-202	Rpl39l-201	Cobll1-205
Kif1a-204	Gm29340-201	Zfp36l1-202	Ank3-204	Abhd14b-207	Itga6-201
Plch1-201	Col14a1-203	Atp2b4-207	Hoxb9-201	Bmyc-201	Anpep-202
Apbb1-219	Thbd-201	Ntf5-201	Syt11-201	Cfap161-201	Kcnt1-215
Lama5-201	Srsf5-203	Rxra-202	Ncam1-205	Cpeb2-204	Sorbs1-208
Gm3892-201	Prdm1-202	Synj2-208	Pkia-201	Plac9b-203	Sh3d21-202
Gm3411-201	Arl14epl-201	Mapk4-201	Hap1-202	Grhpr-205	Mcf2-201
Gm28876-201	Ldhb-204	Gm17521-201	Gnas-223	Fam178b-202	Aifm1-202
Dpysl4-202	Tinagl1-202	Rassf5-201	Gnas-224	Mybphl-201	Ncmap-203
AC174642.1-206	Phf11d-203	Pdyn-201	Gpc3-201	Akr1cl-201	Arhgap4-202
Serpinf2-201	Ppig-206	Gm43240-201	Fam84a-201	Fastkd3-204	Wt1os-202
Pclo-202	Slc29a1-202	Tesc-202	Phox2a-201	Alg13-202	Dlx3-201
Nkx2-2os-201	Gmpr-201	Ets1-202	Bicc1-201	Ybx2-205	Cyp4f16-208
Slc39a5-201	AC167229.1-201	Cntn3-202	Prox1-201	Coro2a-201	Magi1-207
Tes-202	Gm16867-205	Tspan32-203	Rassf4-201	Siah1b-202	RF01962.1-205
Gm43475-201	Plxdc1-201	N4bp2l1-201	Tmem164-203	Irx3os-202	Ppef2-201
Trabd2b-201	Gm3468-201	Dnm1-214	Hoxd1-201	Gm14866-201	Mageb16-ps2-201
Epha7-203	Susd3-201	Fxyd6-203	Gm20467-201	Unc5a-202	Ces3a-201
Serpinf2-202	Arntl2-206	Zzef1-207	Vmn1r47-204	Cphx3-202	Lrriq4-201
Pafah1b1-205	Ddx4-201	Kcnd3-201	Scara3-201	Slc7a2-203	Frmd6-201
Actn3-201	Xlr4a-201	Spats2l-206	Notch3-201	Abcg1-201	Rapgef1-202
2610528J11Rik-201	Syce1-201	Tdgf1-201	Ecm1-202	Zfp106-211	Kcnip1-203
Mkrn1-208	Akr1cl-201	Loxl2-202	Fam83b-202	FO907130.1-201	Whrn-217
Bcat1-203	Rimbp2-205	Map9-203	Lmnb1-202	Ube2t-201	Tgm1-203
Gm15689-201	Zar1-201	Etl4-205	Brinp3-205	D630039A03Rik-201	Lig3-201
Rnase4-202	Lama3-202	Foxc1-201	Rbm5-223	Arhgdig-201	Ptprt-203
Gm4353-201	Brwd1-205	Rbmy1a1-202	Gpi1-206	Etnk2-203	Sall4-201
Plac8-201	Proser2-201	Gm21708-202	Wbp1l-202	Ptpn22-201	Dmpk-208
Krt18-201	Gm7901-201	Loxl2-201	Plcxd3-201	Esrrb-203	Slc6a17-206
Notum-203	Pdzd2-201	Ptch1-202	Zmiz2-204	Cpsf4l-202	Slc2a3-201
Bcl11a-202	Gm12166-202	Tacr1-202	Psd-208	Pank1-201	Stk31-202
Hpn-209	Pisd-202	Tfeb-212	Foxp2-201	Arhgef2-231	Babam2-202
Ptger4-202	Slc25a25-201	Mybpc3-203	Pde3a-201	Haao-201	Lyar-202
Pantr1-207	Mall-201	Serinc5-201	Nptx1-201	Zfp600-201	Trabd2b-201
H19-205	Mapk13-203	Nkd2-202	Stac-201	Socs2-201	Zfp36l3-201
Flrt2-201	Nrd1-209	Elavl2-209	Dact1-202	Calcoco2-202	Ggt1-208
Pax2-203	Clpb-208	Gstm6-206	Col9a1-202	Fmr1nb-201	Ugt2b36-203
Eddm3b-201	Gm13123-201	Gm11946-201	Ncam1-202	Rims3-204	Pld5-201
Ntrk3-202	Zscan5b-201	Fabp5-201	Hnf1a-204	Dcaf4-201	Cdcp1-201
Hba-x-202	Fkbp6-202	Siglece-201	Zfp663-201	Krtcap3-208	Adgrg2-207
Pfkfb3-205	Plcd1-203	Tom1l2-204	Scn3b-203	Rbm45-201	Ablim3-201
Doc2a-201	Ap3b2-201	Mmp2-201	Stmn4-203	Socs2-202	Prkd1-201
Gm5436-201	Fastkd1-202	Fgf9-203	Gm3892-202	Gm5182-201	Papln-202
Rbp1-201	Mplkip-202	Zfp236-205	Gm10593-201	Rundc3b-201	Wnt5b-201
Ctxn3-201	Ppp2r1b-211	Parm1-201	Olfr1501-203	Dmrtc1c1-201	Kcnt1-203
Zfp69-202	Adcyap1r1-202	Gm14322-202	Stxbp6-202	Dmrtc1c2-203	C230034O21Rik-201
Cit-216	Psors1c2-201	Mamld1-201	Foxl1-201	Ascl2-201	Porcn-203
Clip3-201	Plcg2-201	Stxbp6-202	Gdf2-201	Actr3b-202	Cd164l2-201
Gm18860-201	Mov10l1-203	Ppp1r18-201	Lrp2-201	Dynlt1-201	Dach1-202
Pthlh-201	Ktn1-208	Tyro3-201	Plagl1-201	Esco2-201	Zscan29-201
Clstn2-201	Tex12-201	Fat3-205	Gm4353-201	Vrtn-202	Hsd17b2-201
Gm6356-201	4930528H21Rik-201	Rnd3-201	Postn-203	Zfp980-201	Orc1-201
Galntl6-208	Nedd9-202	Hspa12a-201	Gm15689-201	Ifi27-201	RF01962.1-201
Apbb2-210	Gm9770-201	Cbs-203	C1qtnf3-202	Fzd5-202	Col22a1-201
Gm10340-201	Gls2-201	Serpinb1a-201	Nav3-201	Fst-204	Mfsd11-203
Rccd1-202	Wwp2-205	Gm11946-202	Irx1-201	Rhox2c-201	Gpr55-201
1700011H14Rik-202	Ptpn5-201	Efna5-201	Prickle2-203	Syt9-201	Cpne9-201
Olfr536-204	S100pbp-201	Nppc-201	Frzb-202	Il17d-201	Bhmt-201
Cxcl13-201	Rbm38-202	Glipr2-201	Lama2-201	Atp6v0c-202	H2-Q7-203
Prdm6-201	Nt5e-201	Gm28969-208	Mmp16-206	Gdpd2-204	Unc13d-203
Slc44a4-201	Mamld1-202	Gm29179-201	Serpinf2-202	Cntn4-202	Sfmbt2-201
Corin-202	Rreb1-210	Dll3-201	Mgam-206	Tor1aip1-201	Frem2-201
Il11ra2-203	Fgf16-201	Hist1h2bc-201	Hoxaas2-203	Abcc2-201	Epha7-204
Il11ra2-202	Fastkd1-201	Col14a1-203	Tcerg1l-201	Sall4-202	Gmnc-201
Il11ra2-201	Pik3cb-203	Irs2-201	Col25a1-204	Slc17a9-201	Nlrp9b-201
Igf2-202	Akr1cl-206	Rasgef1b-210	Grb10-201	Serpinb1a-201	Epb41l1-204
Tex9-209	Arhgap26-215	Abtb2-201	Eno2-203	Tcf4-243	1010001N08Rik-201
Arl4c-202	Col6a1-201	Maff-201	Tub-201	Tex11-202	Sacs-201
Tmem52b-204	Crhr1-201	Fdxr-201	Nfatc4-202	Gm47040-201	Grip1-202
Ret-201	A630001G21Rik-206	Wdfy1-201	Hoxa3-201	Cygb-201	Gm30132-201
Col11a1-204	Gm39090-201	Dtna-203	Glipr2-201	Pcsk6-201	Mcf2-202
NA	Plxnb3-201	Susd3-202	Chst13-201	Enpp3-201	Olfr1286-202
Meis1-203	Pcdhgc4-201	Foxd2-201	Pitx2-208	Pnpla7-201	Cd36-206
Tlx2-201	Fbxl15-202	Serpina5-201	Rspo3-201	Espn-201	Acat3-201
AL732309.2-201	Bend7-201	Myadm-206	Keg1-201	Tmem35a-201	Arhgap4-204
Gulp1-206	Cnga1-205	Pold3-203	Cpm-201	Hn1-202	Gm15873-201
Dpysl3-201	Otog-202	Tmem117-201	Esrrg-203	Rspo1-201	Lpcat4-202
Hoxb4-201	Mpped1-201	Arhgap45-203	Gm22008-201	Mettl24-201	Gabpb2-201
Ggt1-208	Lypla2-202	Cspg5-201	F2r-201	Ubc-202	Elfn1-202
Ptn-201	Slc52a3-204	Unc5b-203	Lrrc75b-201	Ubap2l-203	Nr6a1-206
Scube3-201	Mcrip2-201	Tmem198-202	Osr2-201	Nr5a1-201	Abca4-201
Itgb6-202	Ralgps2-202	Slc35a2-206	Hist3h2ba-201	Usp29-201	Isl2-201
Emx2os-201	Ung-205	AC240971.1-210	AV026068-213	Fam178b-201	Fndc1-202
Tinag-201	Hk1-203	Gm28136-202	Gm17473-201	Rgs2-202	Pglyrp1-201
Ntm-201	Efhd1-201	Gm28444-201	Ddr2-205	Rab11fip1-203	Cdk15-201
Arhgef10-207	Rpl21-202	Olfml2a-201	Gm266-201	Gm5850-201	Capn1-202
Tmem27-201	Espn-201	Adamts5-201	Fmn1-204	Rec114-201	Mbnl3-204
Adgra2-202	Tcl1-202	Fam19a2-201	Pcdh19-202	Mybl2-201	Dab1-203
Hoxa7-202	Ly6g6e-201	Polrmt-213	Cxxc4-203	Pcgf5-201	Nos1-206
Olfm2-203	Rnf17-201	Tmem176b-212	Mcc-202	Vcp-201	Kcnt1-204
Fli1-202	Prdm14-201	4930474H06Rik-201	Gpr45-205	Mir9-3hg-201	Zfp277-202
Hoxa11os-206	Tmc3-203	Ank3-247	Ntm-203	Sorbs3-202	Grik5-201
Ica1-212	Actn2-205	Itgb8-201	Zfp804a-201	Bid-201	Ces2g-201
Arg1-201	Zfp367-201	Gm28145-201	Thy1-201	2010204K13Rik-202	Dsc2-201
Gm3376-201	Dhx16-203	Fam110a-202	Mob1a-201	Pou2f3-202	Mthfr-206
Mrc1-201	Nabp1-201	Tmc3-203	Nnat-202	Lrriq4-201	Tkt-201
Clec18a-202	Arx-202	Fcgr3-203	Slc29a1-222	Tceal6-201	Sstr3-201
Hemgn-202	Rps2-206	Arhgdig-201	Postn-206	Krt20-201	Lef1-204
Gpm6b-201	Olfr397-204	Qsox2-201	Olfr145-201	Pde1a-201	Edn2-201
Lad1-201	Rnf220-205	Sh3bp5-202	Grid1-201	F930015N05Rik-201	Casp12-205
Igfbp3-202	Trim47-206	Adcy6-207	Grik2-202	Tescl-201	Dapk1-207
Id3-201	Ooep-201	Agpat4-201	Osr1-201	Fndc1-202	Gm27512-201
Pbx3-201	Pgbd5-204	Ccl17-201	Dcx-201	Pacsin2-202	Cyp2f2-201
Alx1-208	Wnt6-201	Slc12a8-205	Npr3-201	Sugp2-214	Sorbs2-220
Rxfp2-205	Robo2-202	Dkk3-201	Nnat-205	Gls2-211	Fam214a-201
Elovl2-201	Esm1-201	Galnt10-201	Slc35c2-201	Cbx7-203	Lcn2-201
Cdkn1c-204	Arx-203	Islr2-202	Elovl2-201	Rab11fip1-201	Kif1a-202
Mgam-201	Slc4a11-201	Cep128-211	Agtr2-201	Vars-210	Nfat5-214
Bmper-201	Txlna-207	Carmil3-205	Arhgdib-203	Chchd10-201	Nucb1-209
Mgam-202	Slc6a14-201	Stox2-206	Dkk1-201	Zcwpw1-201	Alg13-201
Cdkn1c-203	Hsd17b3-205	Inhbb-201	Sgsm1-201	Zyg11a-202	Adam8-207
Flywch2-201	Echdc2-206	Cdc14b-204	Ptx3-202	Tdrkh-208	Tpst2-202
Tmem229a-201	Smcr8-202	Tacr3-201	Col1a1-201	Sohlh1-201	Cyp2ab1-202
Acp5-203	Dock6-202	Col4a2-201	Pcdh20-201	Rgcc-201	Gm28085-201
Hs3st6-201	Zfp750-201	Dusp14-205	Pgf-201	Stum-205	Cd2-201
Igfbp3-201	Gstm6-206	Gm4781-201	Elof1-204	Pigb-207	Tuba4a-201
Ctse-201	Rhox8-201	Epn2-212	Mmrn1-201	Cabp7-201	Rasl10b-202
Zfp536-203	AL590629.2-201	D3Ertd751e-215	Insm1-201	Nrtn-201	Emx2-202
Cacna2d1-205	Elavl2-202	Kcne1l-201	Slc1a3-201	Kitl-201	Lrrk2-204
Npnt-202	Stc1-201	Uty-210	Trim2-206	Ccnb1ip1-201	Prkag2-201
Lpin1-201	Col27a1-202	Serpinb6a-208	Adgrg3-201	Tigar-202	4930550C14Rik-204
Spi1-201	Gm10499-202	Erbb4-202	Mcoln3-201	Rhox2b-201	Rhox5-201
Adamts18-202	Olig1-201	Sept9-202	Stac-202	Proser2-201	Rhox5-203
Adh1-201	Spata21-201	Sox8-202	Nfasc-202	Clpb-208	S1pr1-201
Actr3-204	Spry4-201	Qsox2-202	Pofut1-207	Gjb4-201	Rps8-203
Rasal1-205	Etnk2-203	Sgip1-201	Adamts18-201	Lrrk2-202	Npnt-201
Itgb4-201	Acer3-204	Synpo-210	Tspyl4-201	Tdrd1-201	Tiam2-207
Bmp5-201	Nefh-201	Src-205	Zfp536-202	Nmnat2-204	Plcg2-201
Hba-x-201	Nexmif-201	Pla2g5-203	Mecom-217	Gm12166-202	Vmn1r35-205
Tmem178-201	Usp29-201	Synj2-202	Ednrb-201	Ppig-205	Sspo-202
Gm11505-201	Sorcs2-201	Ptpre-208	Cd248-201	Stag3-209	Dnpep-204
Zswim6-201	Psat1-207	6330403L08Rik-202	Pdzk1ip1-202	Chd9-206	Klf8-201
Cntfr-204	Pak3-205	Tbc1d24-203	Shd-201	Sh3tc2-201	Prdm16-205
Mthfs-207	Zfp296-201	9530068E07Rik-201	Gpr85-201	Rpl10l-201	Pik3r3-201
Igsf9-201	Zfp819-201	Hmgn2-203	Gata5os-201	Rpl35a-201	Adgrb2-207
Nfatc4-202	Ripor2-206	Chp2-201	Tuba1a-201	Als2-202	Lor-201
Trpc7-203	Als2cl-206	Hmgn2-201	Ryr3-201	Stk31-203	Rasa4-209
Mmp16-201	Col27a1-201	Foxp4-204	Gria1-201	Zfp146-201	9430078K24Rik-201
Foxd2os-201	Cpsf4l-205	Sparc-208	Rcbtb2-219	Gstm2-201	Uap1l1-201
Rplp0-203	Fam169a-201	Radil-201	Fgfr2-210	4930528H21Rik-201	Smarcd3-208
Nr2f1-202	Sox9-201	Scrn1-201	Cldn9-201	Hadhb-203	Plcb2-201
Elovl7-202	Nphs1-203	Tagln2-201	Il11ra2-203	Glrx2-211	Trhde-201
Sgpp2-201	Chit1-202	Mamld1-202	Il11ra2-201	Rab6b-201	Rnf43-206
Plagl1-202	Cnn3-203	Gli2-201	Pid1-201	Nlrp14-201	Dyrk1b-202
Emilin2-201	Cntn1-201	Fgf1-204	Il11ra2-202	Wnt6-202	Uhrf1bp1l-203
Agrn-202	Tns1-222	Fblim1-201	Meox1-201	Kcnt1-201	Tex15-201
Runx2-203	Ptk2b-203	Pak3-206	Arhgap36-202	Thumpd3-202	Dclk1-201
Foxi1-201	Rnf32-211	Ank1-207	Gm11802-201	Tulp2-203	Fmnl2-204
Skap1-201	Gm25767-201	Olfr1263-203	Cdc42bpa-201	Gm28959-201	Cd244-201
Rtn2-201	Uck2-205	Ctgf-203	Uvssa-203	Fam129a-205	Kdm3a-201
Foxp2-206	Cdh23-205	Itih5l-ps-201	Nfatc4-201	Ablim3-202	Zfp672-201
Sphkap-202	Gemin8-203	Gm29343-201	Hoxc8-202	Gm13123-201	Wnt10a-201
Hnf1b-204	Apoc2-202	Serinc2-202	Mcoln2-201	Zfp106-205	Plxna4os3-202
Sulf1-202	Irgm2-202	Rasgef1b-209	Gal3st4-202	Tnfrsf19-201	Gbx2-201
Gm7292-201	Sphk1-205	Nckap5-208	Hoxb4-201	Gbx2-201	Plekha7-220
Srsf5-212	Ldhb-201	Sgip1-202	Lrig3-201	Cpne8-202	Adgre5-201
Tle3-208	2610028E06Rik-203	Ppp1r1c-205	Ralyl-201	Trib3-201	Runx1-201
Thsd7a-202	Dynlt1-201	Sct-204	Ecm1-201	Tbc1d25-204	Zc3hc1-207
F2r-201	Dennd2c-202	Gm28396-201	Slc25a53-214	Il10rb-201	Fam160a1-201
2810429I04Rik-202	Foxr1-202	Tcn2-206	Prss23-201	Serpinb6a-202	D130058E05Rik-201
Mkks-202	Rab6b-201	Uvssa-204	Dlx1-203	Inhbb-201	Abcc2-201
Phox2b-201	Pcp4l1-201	Serpine2-205	Celf4-201	Hcn2-202	Nkd1-201
Espn-215	Papss1-204	Mef2c-213	Padi2-201	Gatsl3-201	Wnt2b-201
Foxp1-228	Stoml1-206	Tnnt2-207	Nrp2-206	Zbtb32-202	Gca-201
Cdh2-201	Lcmt1-204	St8sia2-201	Nhsl2-201	Mbnl3-203	Smpx-203
Crispld1-202	Ipo9-206	Spry1-201	Gata3-201	Dnd1-203	Atp11c-205
Ktn1-226	Ufd1-202	Steap1-201	Mecom-208	Tmem206-201	Atp11c-208
Dhcr24-201	Hhip-201	Shc4-201	Rps19-ps6-201	Nmt2-201	Wt1os-203
Nrsn1-204	Col18a1-202	Gstm7-203	Tmed10-202	Irx5-201	Fkbp6-201
Meis3-201	Robo2-201	Mro-206	Grik2-205	Fam196b-202	Akap1-202
Zfp691-202	Sdc4-201	Pkn1-201	Pcdh19-203	Psors1c2-201	Myo5b-202
Ifi203-203	Gm2044-201	Cd24a-201	Map3k21-201	Sox5-204	Sema3e-202
Sept3-201	Ddx11-201	Sema6c-203	Synpo2-202	Etnk2-201	Stxbp1-201
Limch1-205	Adamts9-203	Lrp4-201	Dlk1-205	Gca-201	Igtp-201
Ccnt2-201	Itgb5-202	Gstm6-201	AC165954.1-203	Itpripl1-201	Ugt2b36-201
Meis2-205	Gm28134-201	Sept11-205	Mtcl1-202	Dmc1-201	Pank1-201
Plch1-207	Mageb4-201	Fam184b-201	Apbb1-219	Gls2-201	Dlgap1-214
Mapk15-202	Enpp2-202	Vmn1r181-202	Gpm6b-201	Actr6-201	Tcf4-252
Ccnd1-201	Tex21-202	Man2c1-202	Igsf5-201	Umodl1-203	Gja1-206
Tmcc3-203	Tfe3-203	Tia1-211	Tpm1-216	Epp13-203	BC023105-201
AA986860-201	Rcc2-205	Fgf13-201	Hapln1-201	Gm19428-201	Adamts4-203
Grb7-202	2610028E06Rik-205	Gstm1-203	Cobll1-205	Meltf-201	Amph-205
Rnf165-202	Synj2-209	A330041J22Rik-201	Gm45660-201	Dlgap4-206	Mogat2-201
Nkd1-203	Pax6-204	Fbxl5-204	Spint1-201	AC166341.1-201	Ovol1-201
B4galnt1-201	Grb14-208	Gm30918-202	Dock10-209	Vmn1r13-202	Mreg-201
Ank2-208	Olfr824-202	Gm10925-201	Itga9-202	Ddx19b-202	4921514A10Rik-202
Tmc4-201	Eps8-208	Cela3b-201	Cnn2-201	Exoc3l2-201	Smarca2-201
Cog4-203	Prdm1-201	Sox6-202	Ncs1-201	A230005M16Rik-201	Agtpbp1-214
Mdk-203	Slc7a5-201	Synm-202	Rbms3-206	3110002H16Rik-201	Acsm3-203
Rarg-201	Gm21451-201	Dram1-203	Rnd3-201	Fkbp6-202	Fbxo15-201
Adamtsl4-201	Sall4-201	Col27a1-202	Gtf2ird1-203	Nr6a1-202	Zfp385b-204
Vat1l-201	Leprot-202	Cep57l1-205	Hmga2-201	Uggt2-203	Gm21917-202
Stra6-214	Chdh-202	Tmprss5-201	Sfrp1-201	2610028E06Rik-205	Tff2-201
Zfp804a-201	N4bp2l1-201	Mecom-213	Spon2-201	Rorc-201	Pcf11-205
L1cam-201	Gm17080-201	Ganc-206	Gpx3-201	Got1l1-201	Trpc5-201
Large2-201	Fdxr-202	Mafk-201	Cdh2-202	Mta3-203	Elf2-202
Gm10039-201	Sin3b-202	Agmat-201	C1qtnf3-201	Per1-203	Cd83-202
Gypa-201	Dmrt1-201	Mrps17-205	Acp5-203	Pced1b-204	Kcnip4-208
Snx15-202	Kcnj3-201	Cul9-209	Dpp4-201	Cacna1d-202	Myo5a-205
Exosc6-201	Slc9a2-201	Wisp1-204	Gm13305-202	Abhd14a-202	Kcnt1-201
St6gal2-205	Smad2-205	Dusp15-201	Akr1c19-201	Magi1-203	Myhas-202
St6gal2-201	Gna14-201	Gpm6b-212	Pappa-201	Xlr4b-201	AC116724.1-201
Mocs1-201	Nmt2-202	Igsf23-204	Zeb2-201	Gstcd-201	Cilp-202
Tspyl4-201	Ppp1r15a-202	Jag1-201	Cnot2-204	Bclaf3-202	Syt13-201
Sptb-202	Rhox5-204	Ncmap-201	Kcnj2-201	Impdh1-207	Lbx2-201
Syt11-205	Kcnma1-221	Mef2c-217	B3galt5-202	Vgll2-202	Ddr1-201
Pdgfc-202	Rhox5-202	Scx-201	Tmeff2-201	Fxr1-207	Srcin1-202
Hoxc4-201	Fgf13-201	Tpd52l1-201	Nrf1-209	Asb1-202	Gbp2-201
5730596B20Rik-201	Sp1-202	Zfp595-204	Tmem27-201	Laptm4b-201	Rit1-210
Cdh8-204	Umodl1-203	Gm10371-201	Ccnd3-202	Atp1b2-202	Rspo2-203
Pnliprp2-201	Plekhg4-201	Dlgap1-201	1700011H14Rik-205	Ccdc170-201	Slc11a2-206
Bcl7a-203	Pik3cd-201	Plekhs1-202	Sh3kbp1-204	Nrf1-214	Arhgap21-208
Ptgfr-202	Cbr3-201	Sh3bp1-206	Dock10-208	Pla2g4e-201	Tbx4-203
Clk1-212	Gldn-201	Mylk-201	Prune2-209	Plbd1-201	Cdkn1a-203
Mapk9-203	Cemip-201	Eps8-202	1700024B05Rik-202	Gpld1-201	Tspan1-201
Samsn1-201	Zfp949-203	Mcf2-203	Cacnb4-203	Dppa3-202	Isx-202
Bdh2-201	Gm6871-201	Dlc1-202	Prom1-203	Otog-202	Ptpro-201
Basp1-201	Sptbn2-201	Gm28235-201	Ankrd44-210	Atf7ip2-201	Stac2-201
Hoxa9-203	Etnk2-204	Nsmf-215	Sim2-201	Trim71-201	Oprk1-201
Pitx1-201	Gm45469-201	Gm28633-201	Basp1-201	Klhdc10-206	Zfp516-201
Dlgap1-211	Nr0b2-201	Frem1-202	Lgi2-202	Papss1-204	Nlrp12-201
AI506816-203	Tsku-205	Apoa4-201	Spta1-201	Kcnma1-221	Nlrp12-203
Hoxc4-202	Tex19.1-201	Cst8-201	Dock2-206	2310061I04Rik-203	Dlg3-208
Edil3-201	Rec114-201	Nodal-201	Fn1-201	BC048679-203	Sema3a-202
B4galnt4-201	Agt-201	Cst8-203	D030025E07Rik-204	Dock4-201	Clstn3-201
Foxq1-201	Sphk1-202	Sema5a-201	Matn4-201	Slc5a5-201	Plbd1-201
Hoxc5-202	Col4a3-201	Ptpn5-201	Alx1-203	Nr0b1-201	Dock2-201
Bmp4-202	Ripor2-204	Plec-214	Cabp1-204	Blnk-202	Pcgf5-202
Epha7-202	Pmm1-201	Olfr124-202	Acsl1-203	Nlrp5-201	Gbp2b-201
Klhl4-201	Slc5a11-201	Gm27177-202	Zfp385b-201	Chp2-201	Ifnar1-202
Gm3892-202	Sema5b-201	Cbln2-204	Vmn1r80-202	Got1l1-204	Ifnar1-203
Gm10593-201	Smarca2-216	Col4a3-201	Dusp26-201	8030474K03Rik-201	Srxn1-201
Col12a1-204	Bricd5-201	Pgf-201	Sema5a-201	Hsp90aa1-202	Dpcr1-201
Trpc7-208	Blnk-202	Enpp6-201	Tagln3-201	Dcun1d4-202	Lrmp-204
Gm45246-201	Gata4-202	Hsd17b3-204	Meis2-202	Tcf12-218	Ube4a-208
Daam2-203	Alpl-201	Pcdhgb7-201	Acer2-201	Mogat2-201	Arhgap4-216
Nrxn1-213	Tmem86a-201	Tiam1-214	Efnb2-201	Ppm1j-201	Irgm2-201
Amot-202	Zmynd11-218	Tmprss13-201	Thsd7a-206	Whamm-201	Irf6-201
Dmtn-209	Cst8-201	Car7-204	Tek-201	Apbb1-214	Olfr653-203
Pitx2-207	Plcb4-213	Fgf18-201	Slc18a3-201	Arx-203	Sdr42e1-201
Apobec3-202	Nop56-204	Lsp1-203	Arhgap45-203	Ubtf-202	Rnf128-201
Bmp4-201	Tspan15-202	Pitx2-201	Sort1-201	Pacsin1-203	Disp1-202
Slc16a12-201	Dtnb-203	Gstm6-202	Crmp1-201	Zc3hav1-203	Mybpc1-201
Drp2-202	Hmgcs2-201	Plcb2-205	Bche-201	Lypd6b-201	Rgs2-204
Actg2-202	Acp7-201	Gstm7-202	Nhsl1-201	G2e3-202	Dppa2-201
Kcnab1-201	Robo2-209	Ripor2-205	Gm16401-202	Rps6ka3-204	Car14-201
Kcnq5-206	Cst8-203	Gatad2a-205	Mab21l2-201	Igfbp2-201	Daam2-203
Des-201	Ints10-204	Myom1-203	Capn6-201	Paqr7-201	Msra-204
Prtg-201	Zbtb7b-201	Olfr1318-205	Jag1-202	Smpx-203	Cacna1d-205
Hoxb9-201	Sgk3-203	Lmf1-210	Tagln-202	Zfp42-201	Gm26626-201
Rac2-201	Uqcr10-203	Pcdh8-204	Mapk15-202	Tle6-201	Gm17916-201
Smim10l2a-201	Unc5a-202	Acvr1c-202	Zeb2-212	Tcfl5-201	Drp2-206
Sulf1-201	Npm1-203	Ablim1-202	Coro1a-201	Acacb-201
Nnat-205	Stk31-203	Ptch1-204	Camsap2-203	Msx1-201
Hk3-208	Acbd4-203	Gm20736-203	Aldob-201	Klhdc4-201
Actc1-201	Krt222-202	Psd-202	Cx3cr1-202	Ublcp1-201
Arnt2-213	Myof-211	Mical2-206	Lmx1a-201	Ttc39b-202
Josd2-202	Lig1-211	Cited1-202	Ntf3-203	Tmem243-201
Nrk-202	Emilin3-201	Creb3l1-201	Ap1s2-203	Nrap-204
Hnf1a-201	Dppa2-201	Psrc1-207	Stab1-201	Gm15873-201
Spint1-202	Rnf17-202	Ppp1r1b-201	Cdh2-201	Rps4l-202
Crispld2-203	Tspan11-201	Kdm5d-204	Crispld1-202	Rbm46-203
Gm45889-202	Sohlh2-201	Ncstn-206	Col23a1-201	Rec8-201
Aif1l-201	Plcb2-205	Etv1-209	Dlg2-201	Kcnip1-201
Gm16136-202	Acer3-202	Prlr-212	Pdgfrb-201	2310061I04Rik-201
Ddr2-205	Kpna2-201	Soat1-205	Gm13187-203	Rnf128-201
Gria3-209	Egflam-204	Oprl1-206	Ednrb-203	Orc1-201
Hoxc6-201	Gdf3-201	Inha-201	Tmem200b-201	Meioc-201
Hmgn3-201	Rprl2-201	Gm11346-201	Miat-205	Gemin8-203
Neurl1a-201	Rab27a-203	Ush1g-201	Frmd4a-202	Sar1a-208
Hotairm1-201	Dtna-201	Dock10-201	Prdm16-201	Dtnb-212
Depdc5-204	Wnt6-202	Sec61a2-206	Lum-201	Zfp296-201
Has2-201	Caskin1-201	Srp14-203	Gpn3-204	Stambpl1-201
Gm29430-202	Kit-201	Synj2-209	Gm26672-201	Rnf17-205
Igf2-201	Olfml2a-201	Strip2-205	Ptpru-203	Reep1-201
Gata5-201	Tusc3-205	Ntf3-202	Sptssb-202	Plxna4-201
Nfatc4-201	Syne1-201	Gm29366-201	Gpc6-202	Sema5b-202
Myocd-202	Rex2-201	Ppp1r1b-202	Prkg1-202	Ifngr2-201
Kcnh5-201	Emilin3-202	Rbm47-206	Ank2-201	Rps24-201
Rgp1-203	Ide-205	Ppargc1a-205	Gria2-204	Caprin2-202
Lypd6-202	Ide-206	Spin2c-201	Th-202	Wt1os-202
Phc1-211	Mfsd13a-202	Trpc3-201	Mef2c-231	Apoc2-202
Galnt14-201	Kcnk2-202	A530016L24Rik-201	Sort1-203	Tex2-201
Fst-204	Sowahb-201	Lama4-201	Rabgef1-201	Crocc-204
Crispld2-201	8030474K03Rik-202	Sept11-207	Sgip1-202	Pdpn-201
Mdk-202	Adamts8-201	Anapc2-204	Cdh10-202	Pdpn-204
Slc1a3-202	Fgf9-201	6030408B16Rik-202	Nkx2-2os-201	Htra1-201
Notumos-201	Upk2-201	Aph1b-201	St6gal2-201	Afap1l2-201
Ncam1-202	Cpsf4l-202	Kif1bp-207	St6gal2-205	Gm7367-201
Gm45580-201	Adamts2-201	Cacna2d1-204	Crispld2-202	Odf2-211
Capn3-211	C130071C03Rik-204	Qars-225	Crabp2-201	Uck2-205
Gulp1-201	Hist1h2bc-201	Eya1-203	Pcp4-201	Zfp97-201
Ocln-201	Ripor2-203	Pdia3-203	Slitrk4-202	AC164297.2-201
Ltbp1-202	Nfkbid-203	Ctsw-201	Ndufa4l2-201	Dclk1-214
Itk-201	Prlr-201	Palm2-201	Alx1-202	Rsf1-202
Tmtc2-201	Usp29-203	Prlr-202	8030451A03Rik-202	Hoxd10-201
Draxin-201	Nr5a1-201	Pgap2-203	Ptger4-201	Arhgef19-201
Tenm2-201	Fbxo15-204	Ppp1r12a-201	Sncaip-201	Lgr5-201
Rbm5-223	Serpine2-203	Colec11-201	Zfp608-201	Hells-201
Gm22008-201	Dennd1c-201	Zfp819-203	B3gnt5-201	Xlr4c-204
Cdh9-201	Myh7-201	Cct8-203	Foxq1-201	Acot1-201
Rai2-202	Anapc15-205	Atp1b2-201	Fzd6-202	St6galnac2-201
Dbh-201	2610203C22Rik-202	AU021092-201	Fzd6-206	Colec12-201
Plch1-213	Dnajc2-207	Cdh4-201	Vmn1r90-202	Rasd1-201
Rassf10-201	Zfp935-204	Plcb2-202	Kirrel-202	Coq8a-207
Ltbp1-201	Fam20a-201	Mtus1-201	Wfdc15b-201	4930550L24Rik-201
Cxcl12-201	9130015G15Rik-201	Eps8-203	Vangl2-201	Tkt-209
Nrp1-201	Tdh-201	Schip1-203	Ubap2l-205	Mycn-201
Dlx5-201	Naip5-201	Osgin1-206	Fbxl5-204	Cul4b-203
Aqp3-201	Hs3st3a1-201	Hivep3-209	Fgfr1op2-201	Asz1-202
Tenm2-202	Hdhd2-208	Serpine2-204	Foxd3-201	Tcea3-201
Cpt1c-201	Trac-202	Rcsd1-201	Crispld2-201	Espn-212
Gm42901-201	Polk-205	St7-205	Tbx3-202	Adamts16-201
Hand1-203	Hsf2bp-202	Ankrd13a-203	Pdzrn4-201	Prdm1-202
Ism1-202	Gstm1-203	Sparc-205	Ptprn-201	Fbxo6-208
Crb3-202	Kirrel2-201	Nrg1-213	Gc-201	Rasa4-209
Prdm16-206	Gramd2-203	Fosl2-201	Tmem100-201	Hs3st3a1-201
Cabp1-204	Nr1h4-203	Htra3-201	Fsd1l-207	4930432K21Rik-202
Pdzk1-201	Srp54b-202	Wisp1-202	Dpp6-202	Kitl-206
Mep1a-202	Zfp987-203	E230013L22Rik-201	Cadm2-202	Brwd1-209
Mkrn2os-202	Adamts16-204	Mfsd2a-201	Gabrb2-201	Themis-201
Mecom-213	Scara5-201	Jade1-202	Foxp1-204	Nek3-202
Myadml2os-201	Map7d2-204	Rangap1-202	Dll3-201	Kcnc4-201
Hmcn2-206	Sema4a-214	Gsta2-202	Ablim1-206	Gdpd2-202
Tll1-201	Son-202	Gpc3-202	Rxfp2-205	Sorbs3-203
Stab1-201	Zyg11a-203	Pik3c2g-202	Btbd8-208	Tex101-201
Ednrb-203	mt-Nd3-201	Sema3d-201	Igf1-202	Smarce1-206
Fzd2-201	Cercam-201	Gm29078-201	Adamts1-201	Klhl8-201
Foxp1-225	Dlgap1-210	Mbp-206	Ppp1r18-201	Tsku-203
Shd-202	Dlgap3-201	Pitpnm2-205	Stmn2-201	Nr1d2-201
5730409E04Rik-201	Abhd14a-203	Olfr720-204	Hnf4a-202	Slc37a1-201
Fam84b-201	Lrrc8d-202	Ngef-201	Fibcd1-201	Hdac7-206
Gm9722-201	Pnpla7-201	Mapk4-202	Tfap2b-201	Rad18-206
Tbx3os1-201	Optn-205	Sept11-201	Meis2-203	Rpe-203
5730559C18Rik-201	Prpsap1-209	Wdr95-207	Gm11149-204	Tnfrsf19-202
Myo6-212	Fbln2-206	Gpr153-201	Mettl27-204	Prr23a3-201
Hnf1a-204	Gm3448-201	Lsp1-202	Adamts20-203	D030056L22Rik-202
Hoxa2-201	Itih5-201	H6pd-202	Rragd-203	Msrb2-201
BC049730-201	Rpl10l-201	Sept9-201	Zcchc12-201	Pdk4-201
Arhgap28-201	Gabrb3-206	Ablim1-206	Gpc3-202	Cst12-202
Prune2-209	Babam2-208	Gm29077-201	Slc35a5-204	Fam221a-204
Cd244-201	Acap1-201	Armcx3-201	Mthfs-207	Nuak2-202
Rab39b-201	Enpp6-201	Erc2-204	CR974586.6-201	Rps4l-201
AC122397.1-201	Mical2-201	Itga9-204	Adcy8-202	Akr1c14-201
Plxna2-201	Nlrp14-201	Rassf5-202	Gulp1-206	Rbm46-201
Ddc-210	Sphk1-203	Neto2-201	Grem1-201	Prkcz-201
Rtl3-201	Sorbs3-203	Sept11-203	Lmx1a-202	Gm25767-201
Vwa2-201	Scube2-203	Wdcp-204	Shd-202	Folr1-201
Lsamp-206	Mybpc3-202	Tpm1-215	Tgfb2-201	Gm9770-201
Coro2a-201	Clu-209	Rab11a-201	Dlx5-201	Dmrt3-201
Chrdl1-202	Zfp819-202	Ifi213-204	Entpd5-202	Cryl1-201
Plppr3-206	Pik3cd-205	Serpina3g-201	Prdm16-206	Tnni3-201
Slc30a10-201	Tspan32-203	Lhx3-203	Zfp663-202	Schip1-203
Soga3-201	Vcp-201	Scrn1-205	Ccl27-205	Hells-202
Meis3-202	Gpm6b-209	Tpm1-218	Gm44248-201	Syt13-201
Gm8116-201	Tdrkh-208	Dact1-202	Rab3c-202	Rcc2-204
Ddr2-203	Gm2694-207	Adgrg1-207	Bmp4-202	Hells-205
Hnrnpdl-203	Rab3b-201	BC006965-203	Cldn34c1-201	Sesn3-205
Pnlip-201	Dtna-202	Cyp2ab1-201	Clmp-201	Dnah8-201
Fam20c-201	Gm19461-205	Dysf-204	Sytl2-201	Tdrd12-201
Tead2-216	Enpp3-201	Fblim1-202	Fcrls-201	Larp1b-202
Ccr1-201	Kndc1-201	Pakap-202	Edil3-201	Mnd1-201
Hoxd12-201	Tdgf1-201	Fbxo32-201	Gm8615-201	Sbno1-202
Ncam1-205	Mkrn1-201	Clca3a1-201	Hpn-202	Pitpnm3-201
Pcdh20-202	Dlg1-208	Dnaic1-202	Arhgap27-201	Entpd2-203
Twist1-201	Gdi1-206	Igsf3-201	Nr1h5-202	Nfkbid-203
Dmd-211	Cnmd-203	Slc29a1-222	Cdc26-203	Xlr3a-202
Apom-201	Rapgef4-210	Sh2b2-201	Nrp2-204	Rps27l-203
Hoxb5os-201	Cyp26b1-205	Slc6a4-201	Spsb1-201	Plcd1-201
Anapc5-216	Lamc3-201	Matn4-201	Klhl4-201	Bclaf3-201
Tfap2b-204	Duox2-201	AC147041.1-201	Nrp2-201	Mtmr7-202
Fgd2-201	Lrrfip1-205	Ubash3b-201	Hoxa3-203	Stard7-206
Hacd4-201	Zim3-202	Rasgrf2-205	Mfsd6-203	Cox7a1-201
Tlx2-202	Fgf2-208	Rasgef1b-201	Rarb-202	Trpm5-205
Samd14-201	Coch-201	Tmeff2-201	Crispld2-203	Lhpp-201
Gm32717-201	Eprs-206	Nkd2-201	Cdh11-201	Terf1-202
Gm32802-201	Alg13-212	Ppp1r14c-201	Vsir-203	Tex15-202
Lmx1a-202	Dph6-201	Csrp1-201	Ecm1-208	Plac9b-201
Ambp-201	BC034090-204	Gm5868-201	Gm4322-201	Prdm11-205
Msr1-202	Tbcel-203	Ets2-205	C2cd4b-201	Thg1l-201
Lrp3-201	Cacng5-201	Myo6-204	Gm25956-201	Adgrg1-207
Gm6685-201	Tmem120b-202	Gldn-201	Nrp2-205	Etv5-201
Asap1-218	Hmcn2-201	Prmt8-201	Penk-201	Epn3-202
Arhgap36-202	AC116487.1-201	Olfr95-201	Lims2-201	Ccdc15-201
Emid1-203	CN725425-202	Gm47898-201	Pcdh7-202	Dennd2c-202
Ank3-213	Il11ra1-204	Dok7-201	Dlx1as-202	Jade1-206
Zfhx4-201	Tnfrsf12a-202	5830411N06Rik-204	Afp-201	Gabrb1-202
Dcdc2a-203	Fblim1-201	Barx1-201	Ocln-202	Acot3-201
Arnt2-207	Gm5868-201	Prickle2-203	Tmem169-201	Rnf17-204
Nudt10-201	Mthfr-202	Ppargc1a-201	1700011H14Rik-204	Stra8-202
Nlgn3-203	Nr1d2-201	Hck-201	Ank2-208	Rnf213-203
Gm46430-210	Tmem161a-210	Hck-202	Cyb5r4-203	Scgn-201
Tmed10-202	6030458C11Rik-202	Cyp11a1-201	Foxp1-225	Bicdl1-201
Tdrd9-203	Mapk10-204	Bicc1-203	Cmah-208	St3gal4-209
Asb9-201	Zfp109-201	Pakap-203	Rbm24-201	Fkbp6-204
F13a1-202	Clk1-210	Gstm2-203	Slc10a4-201	Sobp-201
Igdcc3-203	Hjurp-202	Styxl1-208	Faxc-203	Irf1-202
Smim24-201	Cltb-202	Nid1-201	Gm45580-201	Etnk2-204
1700011H14Rik-204	Eaf2-204	Efemp2-211	Gm16136-202	Mageb16-202
Tmem26-201	Gvin1-202	Plgrkt-201	Foxp4-202	Platr4-201
Cntrl-203	Trib3-201	Tomm40l-206	Insm2-201	Cenpv-201
Plcb1-205	Gm13328-201	Tacc2-215	Crmp1-202	Prss35-201
Plvap-201	Sh3tc2-201	Chchd10-201	Vmn1r69-203	Smad2-205
Csf1-201	Eef1g-201	Star-201	Gypa-201	Mrpl3-207
Prrg1-202	Lrba-208	Plekhb1-207	Gm15998-201	Susd3-202
Id2-201	Gdi1-208	Arhgef39-208	Adgrg3-205	Kcng1-202
Hoxa10-203	Prss53-201	Slc25a1-204	Sept3-201	Edn2-201
Col12a1-206	Rassf5-202	Traf3ip2-205	Creb5-201	Gstm6-202
Rxfp2-201	Ddx58-201	Ppt1-201	Gm16096-201	Spata5-209
Plppr3-202	Pla2g4e-204	A530016L24Rik-202	5730596B20Rik-201	Rnd2-201
Mab21l2-201	Arhgdig-202	Gem-201	Elmod1-202	Dmrta1-201
Rassf9-202	Cyp26b1-204	Mybl1-201	Skida1-201	Ldhb-204
Cyb5r4-203	Rnf17-205	Nrg1-203	Parvg-201	Neurl1a-202
Fcrls-201	Col9a3-202	Nrf1-208	Samd4-206	Aatf-201
Scrt2-201	Slc7a2-202	Mcrip2-201	Cpm-204	Tex30-201
D430041D05Rik-203	Gatsl3-201	Uty-205	Serinc2-201	Mkrn1-203
Mmp16-206	Smtnl2-201	Ripor2-208	Hpn-209	Rhox4e-201
Foxp2-213	Foxh1-201	Amotl2-208	Gm23134-201	Qsox1-201
Elavl4-203	Papss2-201	Lpar1-204	Pag1-201	Sin3b-202
Arhgap27-201	Gm2a-201	Cspg4-201	Lhfp-201	Vill-207
Pitpnm1-201	M1ap-201	Zfp708-202	Dcx-203	Ubc-203
Pitpnm1-213	Zbtb32-202	Cst3-201	Colec11-201	Phc3-204
Stra6-205	Zfp981-203	Robo2-206	Phldb2-207	Ide-207
Asphd2-201	Asz1-202	Tmc7-201	Ankrd28-207	Ide-204
Grik5-201	Psenen-206	Plk5-202	Psrc1-207	Dnajc2-207
Fzd4-201	Gm10324-201	Slfn9-203	Plod2-203	Ak7-201
Ceacam2-202	Ccdc172-201	Gm29671-201	Palm-205	Akr1cl-206
1700063D05Rik-204	Pcsk5-202	Etl4-203	Csf1-202	Tnnt1-203
Ascl1-201	Best1-201	Sgk3-203	Smim10l1-202	Gabrb1-201
Hmgcll1-201	Fdft1-203	B230322F03Rik-201	Mybpc1-201	Scml2-201
H2-D1-203	Pex26-202	Nabp1-205	Tpm1-203	Pigq-219
Hpgds-201	Xlr3b-201	Trib2-201	Rnase4-202	Xlr4c-203
Peg10-202	Vmn1r199-202	AC167229.1-201	Cbs-203	Trim7-201
Bin2-205	Rhox2a-201	Oaf-202	Chrna3-201	Pde8b-201
Fam107a-202	Col9a3-203	Iqgap2-201	Tmem252-201	Zscan10-201
Grm4-201	Slc30a2-204	Ptch1-210	Flrt2-201	Nop16-203
Wfdc15b-203	Kmt2e-201	Ddx3y-202	Hnrnpk-216	Pyroxd2-201
Mdm1-202	Egr1-202	Lpcat2-204	Lrch1-204	Spata5l1-201
Akap12-203	Ublcp1-201	Cdh11-201	Kirrel3-208	Rnf17-203
Glb1l2-201	Gstm1-202	Armcx2-201	Stk32b-201	Tle6-214
Lrrc56-201	Eif5-205	Gm21882-201	Ptn-202	Cx3cl1-201
Ackr3-201	Klhl12-201	Atp2a3-203	Gm24846-201	Adk-207
Gm7334-201	Pmm1-206	Epha2-201	Dock10-201	Rapgef6-204
1810022K09Rik-204	Gm14139-202	Dusp6-204	Gal3st4-201	Rcn2-204
Habp2-201	Gm14756-201	Vwa1-201	Gm29430-202	Dtnb-204
Tirap-207	Anapc1-203	Bok-201	Adamts1-202	Coq8a-209
Rbms3-206	Tigar-202	Phactr3-201	Olfr679-202	Abhd14a-203
Kcnn4-202	Inpp5d-208	Mef2c-231	Tfap2b-204	Pdyn-201
Sept4-205	Map9-203	Pxn-210	Myh10-202	Ranbp17-203
Limk2-206	Rpl35a-204	Mapk13-202	Cttnbp2-208	Plekhg4-201
Tmem252-201	Stox2-208		Mab21l1-201	Rad18-207
Tmc4-202	Rgs11-208		Loxl2-202	Aurkc-203
C1s1-204	Star-201		Tmtc4-209	Ptpre-205
Cd83-202	Gm21708-202		Wsb2-202	Tbx4-203
Prdm6-203	Rbmy1a1-202		Nes-203	Capn5-202
Megf11-203	Aurkc-204		Tacc1-202	Zfp949-203
Clic6-201	Ube3a-218		Cavin2-201	Trim6-201
Igfbp1-201	Nop56-208		AV026068-208	Gm14261-201
Tmem169-201	Vsig10-202		Mrc1-201	Shisa8-201
Kif12-205	Tesc-202		Arhgap24-201	E330013P04Rik-202
Vcan-203	Slc16a2-201		Mef2c-217	Kif1a-201
Eml1-201	Fkbp5-202		Col1a2-201	Gjb5-201
Igf1-202	C1ql2-201		Elavl4-202	Doc2b-201
Igf1-203	Gml2-201		4930426D05Rik-202	Tnni1-206
Klk8-201	C1qtnf1-201		Dab2-203	Gpc4-201
Fhl1-201	Sh3bgrl2-202		Nrp1-203	Rasa4-202
Olfr1258-201	Sec14l4-201		Sncaip-203	Fam129a-201
Il33-202	Fxyd5-214		Galntl6-208	Oit3-201
Notum-202	Rimbp2-207		Mir7116-201	Ggct-202
Tlr5-201	Nanog-201		Slco3a1-202	Slc30a2-204
Fbn2-201	Sptbn4-202		Pbx1-205	Scml2-204
Nnat-202	Pmm1-202		Cldn4-201	Arid3b-209
Dlx2-201	Fut10-204		Ndnf-201	Sc5d-202
Pax8-201	Bdh1-202		Thsd4-201	Itga6-203
Meis3-205	Hpcal1-201		Plekha5-212	Oplah-201
Pde3a-201	Fdxr-204		Dab2-202	Aard-201
5730559C18Rik-202	Rpl39l-202		Cdh8-203	Cebpb-201
Lypd6b-201	Plec-216		Gnas-203	Fkbp5-202
Cux2-210	Nrf1-216		Slitrk2-202	Gm7972-203
H2-K1-203	Pml-211		Ncam1-204	Carnmt1-201
Ros1-201	Nphs1-201		Hsd11b2-201	Jade1-201
Gm28308-201	Rhobtb1-210		Gm13111-201	Pipox-201
Rapgef1-202	Rpp25-201		Ywhae-204	Tulp2-204
L1cam-203	Sox8-201		Hemgn-202	Eif4g1-207
Ighm-201	Serpinb1a-202		Tcp11l1-202	Stum-201
Hoxaas2-201	Sparc-208		Amotl1-202	Srbd1-201
Foxp2-204	Creb3l1-201		Flna-203	Snhg1-205
Slc4a7-215	1810032O08Rik-205		Ddr2-202	Kifc2-201
Cacnb3-202	Padi2-201		Tenm3-206	Ralgps2-202
Gm6559-201	Gstm1-204		Pag1-204	Tulp2-201
Sulf1-203	Cst11-201		Zfhx4-203	C1qtnf7-203
4931428F04Rik-201	Clca3a2-201		Arhgef2-219	Gm14790-201
Gipc2-201	Mkrn1-206		Ankrd42-209	BC030867-201
Epha7-204	Nabp1-210		Gm47200-201	Cdk5rap1-201
Cdh12-203	Ntf5-201		Sphkap-205	Gstm1-201
Tbc1d4-203	Egr4-201		Gm17276-201	Atrip-205
Gm3173-202	Glrx2-211		Col11a1-204	Prkcq-201
Pdzk1ip1-201	Rsg1-201		Ifi213-203	Zfp710-203
Meox1-201	Mical2-206		Madd-206	Armc8-202
Marveld2-201	Hmgcs2-202		Scin-201	Rp2-203
Lrig3-201	Nek1-208		Stra6-214	Rabep2-201
Dcdc2a-204	Srd5a3-202		Cnn1-203	Eprs-206
D3Ertd751e-201	C1qtnf7-201		Srrm4-201	Espn-216
Lum-201	Mfge8-201		Nsg1-206	Rps8-203
Nup85-207	Sema5b-202		CT868723.1-201	Rhebl1-201
Gpc5-201	Mgat1-211		Xpnpep1-201	Deptor-201
Bmp3-203	Slc38a5-201		Lsp1-203	Ptpre-201
Prkg2-201	Gm15262-202		Dkk2-201	Gm15893-201
Thbs2-201	Myh14-201		Rab17-204	Tdrkh-207
C1qb-201	Usp26-201		Sec61a2-206	Adhfe1-201
Tmed6-201	Rell2-210		Ednrb-202	Rasgrp1-207
Bcl11a-201	Paip1-203		Faap20-208	Tmem171-202
Pard3-213	Efhd1os-201		Gm11149-201	Itpr2-201
Frmd4a-213	Gm5345-201		Gabra1-205	Zc3hav1-202
Ptprr-202	Kpna6-201		Bcl11a-205	Gabra4-202
Dubr-205	Rhox2f-201		Wdcp-204	Upk2-201
Syt16-201	Gstm3-201		Sema3c-201	Six1-201
Anks1b-216	Ero1lb-201		Phldb2-201	Jade3-202
Msr1-201	Adcy7-202		Klhl30-201	Tex13c2-201
Thsd7a-206	Il17rd-203		Micu1-210	Nup93-207
Stab1-204	Clk3-205		Saa2-201	Terf1-201
Cox7b-201	Arrdc4-202		Frk-202	Btbd18-201
Laptm5-207	Rasd1-201		AV026068-209	Nrros-204
Hoxa9-202	Impdh1-205		2810429I04Rik-202	Acsl1-201
Crmp1-201	Gm15091-201		Arhgap11a-204	Ntrk2-207
Mfap4-202	Ide-204		Dok5-201	Sall4-206
Gapdh-208	Ide-207		Rmnd5a-204	AC149090.1-201
Rab36-207	Hck-204		Abca17-202	Igsf9b-201
Cdh16-204	Kcnma1-213		Slit1-201	Myo5b-203
Plcb1-201	Lrrc17-201		Rarg-201	Stk38l-201
Susd4-201	Zfp97-201		Rerg-201	Acsm3-201
Gm2018-201	Olfr1106-202		Unc5b-201	Isl2-202
Isl1-202	Rabggtb-203		Gpc6-204	Rreb1-210
Snhg4-205	Gm19428-201		Apom-201	Cpeb2-201
Tfap2b-201	Cisd3-202		Zcchc18-202	Gm16401-201
Tmem132d-201	Col6a2-201		Arhgef40-202	Nmur2-201
Gm26740-202	Eef1g-202		Gen1-205	Mdm4-201
Ndst3-205	Atp5g1-203		Heyl-201	Jak3-201
Mab21l2-202	Myef2-207		Fmn1-202	Fam83g-202
Adamts18-205	Olfr316-202		Ror2-201	Nfatc2-201
Hapln1-201	Rnf212b-201		Th-204	Ntn1-202
Prrx2-201	Epp13-203		Clip3-201	3110001I22Rik-201
Hid1-203	Tfap2c-204		Tspan2-201	Igsf21-201
Pde4a-201	Rps8-206		Mapk9-203	Atp10a-201
Gm47163-201	Gm41-201		Smpd3-201	Usp7-207
Lockd-203	Nabp1-205		Insc-208	Hpgd-201
Ahnak-202	Cnpy1-202		Rplp0-204	Pax6-202
Cpped1-203	Dis3l-208		Zfp69-202	Zfp345-201
Rian-202	Serpina5-201		Rc3h2-205	Klhl12-201
Phldb2-201	Robo2-206		Prrg1-210	Srp54-207
Gpr85-201	Cecr2-201		Mdfic-201	Shtn1-201
Sv2a-201	Gm2694-203		Mdfic-207	Zfp874a-203
AC152063.6-211	Hivep3-209		Rbfox2-203	Abhd3-203
Gm16096-202	Tnnc1-202		Cxcl13-201	Tex19.2-201
Mettl7a1-201	Arhgef3-204		Sdk2-201	Platr16-202
Irf6-201	Fmr1nb-201		Rab6a-203	Gm3333-202
Mdh2-204	Dgke-201		Gm13302-201	Ctdnep1-205
Rbm10-202	Stox2-201		Tgfb2-206	Ddit4l-202
Thy1-201	Tnik-203		Hmga2-203	Klhl13-201
Luc7l3-201	Jade1-206		Corin-201	Lhx9-204
Kif5c-201	Clasp1-224		Col5a2-201	Gm16439-201
Epb41l3-215	Glod4-206		Me3-201	Wnt9a-202
Cachd1-204	Pmaip1-201		Rtn4ip1-202	Pik3cb-203
Gata2-203	Cbs-203		Siah3-201	Tmem184a-201
Cd36-206	Sycp2-201		Itgb6-202	Myef2-202
Pcp4-201	Dppa4-201		Apela-201	Gm15543-201
Nr2f1-205	Vstm4-201		Cd300lf-201	Pou2f1-216
AI467606-201	Ablim1-204		Rerg-202	Ide-208
Lsamp-201	Trpm5-207		Dtnb-211	Ide-202
Npr2-205	Sytl3-201		Dtx4-201	1700097N02Rik-201
Adcy4-201	Pnmt-201		Foxp2-206	Esrp1-203
Ptgs1-201	Smarca2-215		Hoxc6-201	Krtcap3-201
Gm15050-201	Rasd2-202		Ctgf-203	Lama3-202
Prx-204	Tmem176b-212		Mfap4-201	Pax6-203
Gc-201	Esco2-201		Hnf1b-202	9130401M01Rik-201
Rem2-202	Gm13016-201		Lhx6-203	Rtn4rl1-201
Sbspon-201	Shisa2-201		Gm47512-202	Nr2e3-202
Ptgir-202	Sox2-201		Clcn5-201	Kcnt1-206
Mllt3-201	Olfr878-205		Steap4-201	Nr5a2-205
9330154J02Rik-202	L1td1-202		Fbxl7-201	Gm2a-201
Lrrc49-203	Wdr31-201		Zmiz1-201	A530016L24Rik-201
Hoxaas2-203	Adam33-207		Tmem52b-204	Hdac10-207
Col22a1-201	Enpp3-204		Map1b-201	Lbhd2-201
Ccl6-202	Serpinb6a-201		Adamts18-207	Ephx2-201
Fau-203	Bod1-202		Gm16277-201	Zfp473-202
Arntl-206	Rbm45-201		Klhl4-202	Proser3-201
Wiz-202	Gm41192-201		Malt1-202	Rilp-201
Hfm1-202	Plod2-201		Prdm16-207	Elf2-206
Sfrp1-201	Stard7-206		Slc35f1-201	2010300C02Rik-203
Fcgr3-201	Dusp6-204		Ntf3-202	Rhox1-201
Urod-203	Hesx1-202		Muc1-201	Zfp985-201
Prkg1-201	Stk39-203		Zmat4-201	Jakmip1-210
Ephb2-203	Fam110a-202		Gm3149-202	Rufy3-203
Dlg4-201	Pik3cd-202		Gm43475-201	Spo11-204
Ccdc85c-202	Pdgfra-208		Gnas-221	Anxa4-201
Gigyf2-206	Fgl1-201		Pkhd1l1-201	Psme1-207
Stambp-203	Pnkd-202		H2-D1-203	Klf8-202
Nrep-201	Plin1-202		Rufy3-202	NA
Zfp990-203	Prdm16-210		Oxtr-201	Xlr3c-201
Ace2-201	Rnf19a-201		Lpar1-201	Gxylt2-202
Notum-204	Sh3bp5-202		Rasgef1c-203	Mkks-203
Afm-201	1700047I17Rik2-201		Dach2-203	Phf11d-203
Gal3st4-201	Adcyap1r1-203		Eya2-202	Tex10-201
Hoxb8-202	Xlr4c-204		Epm2aip1-201	Acaa2-201
Th-201	5830411N06Rik-204		AC122397.1-201	Sesn3-201
Ripply3-201	Pkd2-202		Syncrip-210	Pik3cd-214
Ppm1h-201	Synm-202		Gm44494-201	Fdft1-203
Tle3-215	Cyp2b23-201		Adam23-211	Nav1-205
Zfp180-205	Tfap2c-206		6330403K07Rik-201	Pdik1l-206
Cdh16-202	Snrpa1-207		Mgam-202	St5-201
Nrcam-202	Srp14-203		Mgam-201	Phf11d-202
Cadps2-206	Sycp3-201		Rassf9-202	Fbxo31-201
Psd3-205	Dok7-205		Meis1-201	Serpina3a-203
Spock3-202	Nek4-205		Gng7-201	Gkap1-201
Plac8-202	Adamts16-203		Spry3-201	Ndrg1-201
2210407C18Rik-201	Psma8-201		Filip1l-202	Casz1-201
Mybpc1-203	6030408B16Rik-202		Ets2-205	Tgfbr3l-201
Zfp949-204	Spsb3-202		Gm27516-201	Hat1-201
Zfp608-201	Rnf181-218		Prkaa1-202	Nf2-203
Myl9-201	Rnf181-201		Steap2-203	Slc41a3-201
Adarb2-203	Pnldc1-201		Hoxb5os-201	Pfkfb3-220
Cobl-210	Serpinb6a-206		Clvs2-201	S1pr1-201
Arpp19-205	Zfp42-201		Add2-208	Sema5b-205
Scly-201	Baiap2l1-202		F2rl1-201	Ncmap-203
Kcnmb4-201	Ercc6l2-202		Themis-204	Smyd2-201
Thumpd3-203	Evx1-201		B4galnt1-201	Nmt2-203
Arhgap4-204	Egflam-201		Shkbp1-204	Rhox2g-201
Klhl4-202	Slc35f2-201		Cadps2-206	4930461G14Rik-201
Wfdc15b-201	Emp1-206		Rai14-207	Prkd1-201
Habp4-203	Myo7a-201		Acss3-203	Mta3-202
Igfbp2-201	Plac9b-201		Wfdc15b-203	Gm37422-201
Slc38a4-201	Rad18-206		Hoxa2-201	Ggct-201
Dnmbp-206	Pigk-201		Zmiz1-208	Lhcgr-201
Dsc2-202	Smoc2-201		Fam129a-203	Olfr681-203
Sall2-202	Myo18a-220		Sorcs3-201	Zmynd8-204
Meg3-202	Mkrn1-204		Postn-202	Fut10-204
Zswim8-209	Ntn1-202		Fgf10-201	Fastkd1-202
Pkia-201	Gm17232-201		Disp1-202	Sh3d21-202
Plppr3-201	Pik3cd-214		Prickle1-201	Plcd3-201
Faxc-203	Dstyk-204		Vgll3-201	Cox6b2-201
Sulf1-204	Paip1-207		Ggt7-201	Gm20531-201
Nfatc4-207	Mical2-204		Ptger3-203	Pgbd5-203
Mecom-203	Actr3b-202		8430419K02Rik-203	Adgrg1-202
Rab32-201	Immt-205		Ndufs2-208	Rexo1-208
Kif1a-202	Dmrtc1c1-201		Rbms3-202	Rgs11-211
Palm-202	Dmrtc1c2-203		Fbn1-201	Sprr2a2-202
Ptprc-203	AC146911.1-202		Lmod1-201	Tdrd7-201
Cyth4-201	Grb14-201		Gjb1-201	Zrsr2-201
Fzd1-201	Arpc1b-205		Clns1a-203	Zfp750-201
Sgsm1-202	Pls1-201		4930538E20Rik-202	Cilp2-201
Dcx-201	Aqp5-202		Zfp697-201	Cyb5r4-205
Kcnmb4os1-201	Bex2-201		BC048559-202	Dock6-202
Gpr183-201	Hmgn2-206		Srgap1-201	Tmem86a-201
Mal-202	Hspa4-203		Gramd1c-202	Ifi27-206
Mfsd6l-201	Entpd5-206		Mstn-201	Kcnq1-201
Gm16567-201	Prokr2-204		Nr2f1-205	Jak3-202
Ttll11-202	Usp43-201		1700011H14Rik-203	Gabpa-202
Hand2-201	Gm11549-201		Gm9885-201	Irx3-201
Me3-201	Slf1-202		Trim2-204	Hotairm1-201
Ddah2-201	Tbc1d24-203		Lysmd3-203	Lipg-201
Zfp703-202	Sept11-208		Csf1-201	Lrr1-201
Kcnj14-201	Msh3-213		Ly6a-205	Cgn-204
Hoxa1-201	Spock2-203		Rnf165-202	Osbp2-201
Lhx6-201	Shtn1-201		Scn9a-202	Pcgf5-210
Cnih2-201	Hyi-202		Bcl11a-204	Ccnh-201
Slc18a1-201	Rasgef1b-207		AC165954.1-204	Trim7-202
Ntm-206	Ddit4l-202		Dlk1-203	Rpl21-202
Dkk2-201	Mgat4a-202		Hoxa10-202	Fam214a-205
Rgl3-205	Ddx43-201		Zcchc7-208	Lypd6-202
Adamts4-203	Sgpp1-201		Adam9-201	Gabra4-204
BC035947-202	Gramd1b-212		Elavl4-206	Rsad2-201
Olfm2-204	Esrrb-203		Col3a1-201	Rgma-201
Igsf5-201	Col27a1-206		Plekha5-202	Ofd1-201
Hoxa10-201	Stag3-209		Crispld1-201	Zfp518b-204
Spint1-201	Fkbp6-204		Ly6a-201	Adgre5-203
Gm6768-201	Erc1-213		Hnf1b-204	Rps2-ps6-201
Fubp1-202	Ubc-202		Nrk-201	Kdf1-201
Ret-202	Klhdc4-201		Psd2-203	Pwwp2b-202
Glrb-201	Fbxo32-201		Igf2-203	Pwwp2b-204
Pag1-204	Mapk4-201		Tor1aip1-210	Pisd-211
Gja1-206	Dusp14-205		Lin7c-201	Zrsr2-208
Gm34015-201	Vmn1r75-203		Gm14391-205	Zfp125-203
Zmiz2-204	Thyn1-201		Gdf6-201	Crnde-202
Mdk-204	Olfr1263-203		Slc2a13-202	Rps24-210
Gata2-205	Ccna2-203		Ndnf-202	Vdac3-202
Myo5a-201	Ankrd13a-202		Kcnj16-201	Prkag2-201
Rcan2-202	Qsox2-202		Etl4-205	4933402E13Rik-202
Uhrf2-203	Oxr1-204		Des-201	Srsf5-203
Ntrk3-206	Steap3-202		Lsp1-202	Dnah17-202
Tcf4-251	Ash2l-204		Gm47302-201	Casz1-204
Ctxn1-201	Zfp264-202		Cttnbp2-207	Ubr5-207
Gm47512-202	Sphk1-204		Gm28308-201	Pxmp2-201
Wdr86-201	Hn1-202		Lama2-208	Slc16a4-201
Skiv2l-211	Proc-201		Epor-201	Rhox2h-201
Spink8-201	Adcyap1r1-201		Gm15975-201	Ttyh1-203
Wdr78-204	Fam184b-201		Ntm-201	Rabac1-201
Lmo7-205	Mnd1-201		Osr2-204	Pla1a-201
Ovol1-201	Fzd5-202		Msr1-202	Cisd3-201
Dbn1-203	Cpsf4l-201		Ankrd1-201	Pik3cd-201
Pik3r1-202	Gm7972-203		4930426D05Rik-204	Tspo-201
Gm2163-201	Meltf-201		Scd2-201	Gm10033-201
Gbp2b-201	Tmc3-202		Paqr5-202	Enpp4-201
Prickle2-201	Mageb4-202		Ret-201	Kit-201
Rpl22l1-201	Gjb3-201		Zfp9-201	Usp28-201
Rsph3b-201	Tsku-206		Irx2-201	Aifm3-201
Mir7116-201	Ralgps2-201		Vopp1-201	Cluap1-205
Gm16559-201	Myo1b-204		Lrp8-202	Micu1-205
Zfp606-203	Tsku-207		Runx2os1-201	Hs3st1-201
Prr15l-202	Tdrd12-201		Vmn2r22-201	Fkbp5-206
Sept4-206	Vmn1r181-208		Fbln5-202	Ide-201
Pld4-201	Tcfl5-201		Zfp691-201	Ide-209
Pth1r-202	Zic3-201		Npy2r-202	Csrnp3-201
Nxn-201	Qsox2-201		H2-K1-203	Nabp1-201
Rnaset2b-202	Slc45a4-203		Hoxb2-202	Adm-201
Epb41l1-201	Pigt-202		Hba-x-202	Kit-204
Kynu-201	Nmi-205		Saa1-201	Prkar1b-210
Pde1b-201	Vmn1r13-202		Wnt7b-201	Enpp3-204
Gm38708-201	Vdr-201		Vwa2-201	Klhl32-201
Xpnpep2-201	Slc9a8-203		Nacc2-202	Pfas-201
Pdgfc-201	Col14a1-204		Synpo-205	Cpne9-201
Ptpn7-203	Etv4-202		Gabrb3-201	Hpse-201
Gm19792-201	Ahsg-201		Capzb-208	Gm35986-201
Kcnip4-208	Gm28396-201		Ifi202b-201	Chit1-202
Gm23134-201	Wnt5a-203		Arhgap20-201	Rtraf-201
Fn1-210	Wdr95-207		Elovl2-202	Zbtb32-201
Hoxa3-203	Lepr-202		Fam107b-201	Cnpy1-202
Ddr1-201	Vill-207		Kctd12-202	Uhrf1bp1l-201
Podxl2-201	Klf5-201		Sgip1-201	Icam5-201
Spag1-204	Tln2-209		Rgma-204	Gdpd2-205
Ifi202b-201	G2e3-202		Steap2-204	Armc8-203
Mta1-204	Gm12070-201		Pcdh8-201	Hsp90aa1-201
Gm42557-201	Nlrp5-202		Agrn-202	Got1l1-202
Smarca2-206	Scarb1-209		Resp18-201	Zfp640-202
B3gnt5-201	Ngfr-201		Wnk3-201	4930447C04Rik-202
Pcdhgb7-201	Adra1b-201		Laptm5-207	Zfp809-205
Abhd11os-202	Abi2-210		Nr1h5-205	Elavl2-205
Antxr1-201	Rprml-201		D030045P18Rik-204	Mtr-202
Sim1-202	Rps2-204		Ddc-207	Tnnt1-201
Hdac4-208	Man2c1-202		Ighm-201	Ptpn6-202
Foxp1-220	Tbx2-201		Efnb3-201	Rpn2-201
Sytl2-206	Fbxl5-204		Fblim1-202	Kcnt1-215
Fxyd2-201	Adora1-204		Snap25-202	Exosc5-201
AV026068-203	Kctd18-202		Ipo9-207	Gtpbp2-211
Tmem234-207	Zkscan3-207		Pkdcc-204	Camsap3-202
Fign-201	Nf2-203		Mybpc1-202	Dhtkd1-201
Igdcc3-201	Zfp936-203		Osr2-203	Lrrc8d-202
Msx1-202	Creb5-203		Adamts6-203	Osbpl1a-208
Rbms3-202	Mageb16-201		Spon1-201	Ifi27-208
Ush1c-202	Inha-201		Mecom-215	C77080-201
Slc25a37-201	Rps26-ps1-201		Gsdme-203	AW551984-202
Prr36-201	Tex19.2-201		Gnas-212	Enpp3-202
Dach2-202	Mbp-201		Adamts3-201	Sdc4-201
Rasl10b-202	Zfp988-201		Erbb4-202	Ubl4a-201
Rab6a-203	Eya3-205		Kif12-202	Fgfr1op2-202
Cxcl12-202	Gm10244-202		Dysf-215	Brdt-202
Faah-201	Ttyh1-217		Jun-201	Sil1-201
Lrrc4c-201	Vdac3-202		Rcsd1-201	Gml2-201
Tenm3-206	Tmem104-202		Slc2a6-201	Crip3-202
Ppp2r2b-202	Zfp640-202		Gm2018-201	Atp9a-206
Mrpl3-206	Rhox2c-201		Pi16-202	Tspan1-201
Gm10800-201	Rpl35a-201		Fn1-217	Acadl-201
Gnas-211	Ptp4a2-205		Bmp3-201	Ptpn6-203
Clec18a-201	Fos-201		Limch1-205	Gm14493-201
Dmrt2-201	Gm16439-201		Nrxn1-213	Polr2i-203
Wnt7b-201	Gm16031-201		Kif5c-201	Bhlhe41-201
Ppl-201	Serpina3b-201		Gm34030-201	Gstm6-203
App-201	Tmem161b-203		Nrk-203	Plcd1-202
Per3-204	Hormad2-201		Msrb3-202	Zfp708-201
Grm8-202	Stk17b-201		Stmn4-202	Nolc1-208
Isl1-201	Sec14l1-204		Ppfia3-201	Ermard-204
Fli1-201	Vmn1r181-202		Gck-201	Mtr-201
Gnas-212	Gm10769-201		Creb5-212	Pcgf5-202
Cuedc1-209	Mbd2-202		Plagl1-220	Acad12-201
Cuedc1-205	C1rb-201		Tenm3-201	Kcnd2-201
Sall1-201	Trpm5-205		Nr1h5-204	Papola-211
AI854703-202	Socs2-205		Cxxc4-205	Rab11fip5-201
Gpc6-202	Ptpro-203		Galnt14-201	Rhox2d-201
Atp6v0a1-201	Gm4781-201		Tm4sf1-201	Ces2g-201
Hemk1-201	Kank3-201		C130060K24Rik-203	Mfge8-201
Sry-201	Gm11831-201		Vldlr-208	Gabra4-201
Slc2a2-203	Mgst2-201		Tpm2-203	Msx2-201
Amy1-205	Hsd11b2-201		Cd84-205	Gm2004-201
C1qc-201	Erbb3-201		Gucy2c-202	Spata21-201
Pcdh19-203	Gfpt1-201		Bbs9-209	Gm14419-202
Rab17-201	Zswim1-201		1700006J14Rik-201	Abcc4-201
Met-203	Gdf15-202		Dmd-211	Impdh1-202
Chrna3-201	Slc44a1-201		Gm28876-201	Pde6b-201
Gm16096-201	Lhcgr-201		Lrp12-201	C1qtnf1-201
Nkx2-3-201	Jade1-201		Gm27204-201	Pkp2-201
Wsb1-204	Dram1-203		Gm45889-202	Plxna4os3-202
Ednrb-201	Slc52a3-201		Fhl2-201	Dok7-203
Smad9-201	Cnmd-201		Lama5-201	Wdr64-205
Brinp1-203	Mybl1-201		D030007L05Rik-201	Mybl2-205
Gpc2-205	Gpr182-201		Clec18a-204	4930447C04Rik-208
Negr1-202	Fam134b-205		Tmem33-203	Ide-206
Abhd11os-203	Nuak2-202		Lgi4-201	Ide-205
Slit3-202	Ptpro-201		Tbx1-201	Rhox7b-201
Zfpm1-201	Otoa-201		Steap2-201	AL590629.4-201
App-202	Mars-206		Fam105a-202	Rps2-202
Gm15378-201	Rab35-202		Ptger4-202	Pofut1-206
Tnk1-203	Radil-201		Stra6-205	Ncoa4-201
Shd-201	Myadm-201		Spink1-201	Zfp367-201
Cyp7b1-201	Enpp3-202		Rabac1-203	Espn-213
Cux1-212	Pqlc1-202		Fstl1-201	Adamts14-201
Ankrd13b-201	AU022751-202		Gse1-201	Sema4a-213
Sh3gl3-208	Il11ra1-210		Cers6-201	Tex30-211
Galntl6-206	2410018L13Rik-204		Slc30a10-201	Ssbp4-215
Nrk-201	Gm26698-201		B3gnt5-207	Smoc1-202
Peg10-203	Btbd18-201		Mtus1-201	Serpinb9b-201
Daam2-201	Tor1aip2-201		Nfatc4-207	Usp9x-203
Slit3-201	Nemf-203		Vmn1r176-207	Mfsd4a-206
Celsr1-203	Socs2-207		Gm4450-201	Taf5-201
Hnf1b-205	Sphk1-208		Etl4-201	Nxf3-201
Oprk1-201	Spic-201		Spock3-202	St5-202
Sptssb-201	Dnah6-204		Zfp879-203	Blvra-203
Gm24846-201	Iars2-203		Frmpd4-203	Kank3-206
Gm13302-201	Clk2-204		Slc18a2-201	Rfx2-201
Hmga2-201	Nedd4-207		Gm32717-201	Ccdc152-202
Itgal-202	Nlrp4e-201		Gm32802-201	Vars-201
Prr5l-201	Dicer1-206		Gm17711-201	1700007K13Rik-201
Wbp1l-202	6030408B16Rik-201		Rgs8-202	Helb-201
Pcdhga11-201	Spata2l-202		Zeb2-202	Ppig-202
Prr16-201	Tead1-203		Vldlr-207	Piwil2-202
Slc29a1-215	Disc1-203		Adamts12-201	Gm7896-201
Gm6158-201	Dlgap1-207		Gm3095-201	Dclk1-201
Abr-201	Shc4-201		Hipk2-206	Tdp2-201
Hey2-201	Rps2-203		Rtn1-203	Rpa2-201
Olfr1023-202	1810032O08Rik-201		Wsb1-204	Matn2-205
Skil-201	Epb41l4b-201		Ltbp4-201	Mlxipl-206
Plagl1-201	Socs2-211		Hif3a-202	Dmrtc2-201
Trpc7-201	Larp1-201		Peli2-201	Rundc3a-210
Ncs1-201	Sh3bp1-206		Ltbp1-202	Egfl6-201
Clns1a-203	Stil-202		Syndig1-201	Dctn6-202
Prtn3-202	Dusp15-203		St7-205	Xrcc6-201
Capn6-201	Rpl39l-201		Hoxc4-201	Gadd45g-201
Col5a2-201	Nkx6-2-202		Hoxd3-206	Pex26-201
Tuba1a-201	Siglece-201		Dnmt3a-218	Pacsin2-203
Mir1903-201	Zscan10-205		Rtn1-205	Adgre5-201
Rhd-201	Olfr789-202		Skida1-202	Setd6-201
Hoxd3-206	Ifi27-205		Gm10600-201	Slc37a1-202
Rai2-201	Pdk1-202		Serpine2-201	Pank1-202
Epb41l3-214	Usp12-203		Tex9-209	Rhox4a2-201
Zim1-201	Igsf21-201		Ndufs2-206	AC112142.1-203
BC051226-201	Rbm18-203		Grb10-203	Zfp936-203
Apela-202	Sfn-201		Gm8116-201	Edar-201
Svep1-201	Atp2b2-201		Grin2c-202	Dclk1-205
Rxfp2-203	A430027H14Rik-201		Nrp2-203	Nqo1-201
Tsc22d3-202	Pde2a-209		Igf2-205	Angptl4-202
Sptb-201	Snx14-206		Dkk3-201	Zfp692-202
Slc35e4-201	Alg13-210		Adgrl3-204	Gm23562-201
Fam163a-201	Ppm1j-201		Foxp1-220	Hps3-201
4833420G17Rik-204	Entpd2-201		Olfr328-204	Cpne8-203
Gm8113-201	Cntn4-211		Cyp26a1-201	Nr5a2-203
Tnik-205	Nrg1-215		Alx1-206	Cry1-201
Slc25a53-214	Abhd14a-202		Ank2-220	Rps26-ps1-201
Gm3558-201	Gm48899-201		Fxyd2-202	Adamts8-201
Cadm2-202	Tbc1d4-204		4930538E20Rik-201	Med14-204
Zfp874b-202	Mga-215		Elovl7-201	Gm13068-201
Gng2-204	Gldc-201		Tet3-205	Rsph1-201
Gm47101-201	Car7-204		Nlgn3-201	Ptpro-207
Grip1-202	Cenpv-201		Artn-201	Lhx9-201
Commd1-206	Pik3cd-206		Rab30-201	Mdm4-202
Clk1-204	Nrbp2-203		Synj2-202	Mov10l1-205
Myh10-203	Rpap2-202		Cntnap3-201	Rims3-203
D030045P18Rik-204	Rab11fip1-201		Anks1b-201	Nanog-203
Nap1l1-203	Pank2-202		Fbn2-201	Gxylt2-201
Anks1b-207	Jakmip1-201		Fli1-201	Fam98c-206
Ebf4-201	Nup35-204		Scg2-202	Zfp934-202
Cd300lf-201	Rhox10-201		Slc44a4-201	Rbm25-209
Gm1604a-201	Etd-201		Pirt-201	Kndc1-201
Rnf43-206	Clca3a1-201		AV026068-222	Cst8-203
Nlgn3-201	Arhgdig-203		Asb2-201	Dgke-201
Gm18537-202	Hsdl1-204		Rai2-201	Rab35-202
Gm12258-202	Rhox9-201		Plpp4-201	Mtf2-209
Slc25a21-202	Rhox9-204		Olfr62-203	Cep85-201
Hoxb2-202	Slc37a1-202		Mecomos-201	Prrt4-201
Gm13187-203	Ralgapb-202		Zfhx4-201	Pde1a-205
Insm1-201	Col4a1-201		Hgf-204	Atrx-217
Epha7-205	Irgm1-201		Dscam-201	Emb-203
Clmn-207	Nppc-201		Tgfb3-201	Mov10-207
Hand1-201	Nrg1-213		Rspo2-203	Tshr-202
Sema3c-205	Atp2a3-203		Lbh-201	Alg13-204
Enho-201	Mgat4b-205		Trp53bp1-201	Rbm12b2-202
Cttnbp2-203	Gm2004-201		Ros1-203	Fam98c-209
Rnf112-202	Gm14419-202		Snhg4-205	Zfp264-202
Pantr2-202	Rcor3-203		Adam23-209	Cep131-201
Fzd7-201	Mapk13-202		Syt17-201	Tgm3-201
Col26a1-201	Rcor3-226		Foxp2-208	Rhox4g-201
Wdr49-201	Rhox2h-201		Cnn2-202	Mrpl24-204
Meis2-213	Gm8091-201		Sh3bp5-202	Clcn2-209
Col8a1-201	Lmf1-210		Prom1-216	Gm7240-201
Sprr2d-201	Il17rb-201		Prss8-201	Cln3-203
Lims2-201	Tyro3-201		Msrb3-201	Ndufa6-201
Cpa6-201	Nkd2-202		Gabra3-201	Clk1-210
Tgm1-203	Mafa-201		Dab2-201	Cc2d1b-201
Fam149a-202	Bsg-202		Nckap5-208	Efhc2-201
Ifit2-201	Tcf23-201		D030045P18Rik-201	Zfhx3-202
Fam171b-201	Arap2-201		Ick-202	Stk31-202
Mrps5-202	Cst9-201		Csrp2-201	Tcp1-210
Fyb2-201	Olfr1318-205		Poln-205	Tsku-206
Irak1-205	Zcchc4-202		Tmem59l-201	Cit-204
Mfap2-201	Tex10-201		Wdr17-202	Tex12-201
Lect2-201	Zglp1-201		Gm7334-201	Drp2-202
Ccl27-205	Cntn4-204		Ap1s2-201	Gpat3-201
Cdc42bpa-201	2610035D17Rik-203		Gpr137c-201	Zswim1-201
Edn3-201	Hp1bp3-214		Gm43236-201	Mrpl15-201
Gdf6-201	Brdt-202		Rtn2-201	Olig3-201
Sipa1l1-201	Slc16a7-201		Mapk1ip1l-202	Palb2-202
Pard3-221	Pdzd2-208		Ptprb-203	Sat2-202
Amph-201	Ncoa1-202		Adam12-205	Olfm1-201
Olfr1286-202	Agpat3-207		Vgf-201	Sgk3-208
Chst11-201	Klhl21-201		Cryab-205	Lrrc43-201
Anks1b-213	5730507C01Rik-201		Negr1-202	Tjap1-201
Fam107b-201	Cp-202		Npbwr1-201	Gm9-201
Fcer1g-201	Tiam1-203		Plcb1-202	Rpl22-208
Gnb1-208	Psd-202		Rhobtb3-203	Hpcal1-202
E030030I06Rik-201	Clk4-203		Isl1-204	Map3k15-201
Vil1-201	Hspa4l-203		Tmem132e-201	Grhpr-201
Jph2-201	2310061I04Rik-201		Mdh2-204	D130058E05Rik-202
2610203C20Rik-214	Map2-206		Nnat-207	Nf2-201
Nrxn1-204	Ncstn-206		Hap1-201	Tkt-201
Meis1-205	Tln2-201		Hs3st5-201	Dusp4-201
Fgfr2-227	Cdh23-214		Pfkfb1-202	Aebp2-203
Cntfr-203	Slc8a1-203		Itpripl2-201	5830432E09Rik-202
Tmem176a-207	Tmem63a-205		Pde4c-202	Rest-202
Pbx3-202	Nrf1-219		2900026A02Rik-203	Ptprf-203
Foxf2-201	Bdh1-206		Pde4c-213	Uap1l1-201
Gm26870-202	Rnf10-210		Ceacam2-203	Rnf125-201
Mpped2-202	Rpl35a-202		Mmrn1-203	Cgn-203
Fsd1-201	Gm11346-201		Gm3252-201	Gm5851-201
Igf2-203	Gata4-204		Fabp5-201	Zscan29-201
Misp-205	Pex26-201		Gnao1-207	Mlxipl-207
BC048559-202	Tex2-201		Ctnna2-206	Pla2g5-203
Camk2n1-201	Kif26b-203		Cul7-204	Zmiz2-205
Alox12b-201	Tmem117-201		Itga4-201	Steap3-202
Carmil3-208	Kcne1l-201		Rab39b-201	Gm17035-201
Gt(ROSA)26Sor-201	Kmt5b-204		Dusp8-201	Wdr75-201
AV026068-213	Dusp12-205		Setbp1-201	Pdzd2-201
Vav1-201	Morf4l2-204		Actr3-204	Aasdh-201
Grb10-201	Cdc42bpa-202		Slit1-203	Tiam2-207
9930014A18Rik-201	Cyb5r4-205		Gm20756-202	Ifi27-209
Gpc2-207	Smtnl2-202		Lrrc7-206	Gm42031-201
Tmem62-206	Pak3-206		Plppr1-201	Mfsd11-203
Speg-202	Rin3-201		Shox2-201	Krt222-201
AI506816-202	Tspan9-204		Fam46a-201	Oaz2-203
Trim2-206	Rdh7-201		Wdr66-204	Gm826-202
Zfp672-201	Cst13-201		Gdnf-201	Gm4779-202
Anapc15-213	Olfr728-204		Igf2-202	Isyna1-201
Vangl2-201	Stambpl1-201		Ska2-201	9430078K24Rik-201
Pcna-ps2-201	Iqch-201		Ache-202	Rgs2-204
Sec24c-202	Ascl2-201		Jph2-201	Iars2-202
Pdk2-204	Copa-204		Sphkap-202	Chpt1-207
Fn1-202	Gm8110-202		Arhgap20-204	Plxnc1-201
Vwf-203	Apobec2-201		St6galnac5-201	Greb1l-201
Tubb5-204	Sytl3-205		Abracl-204	Ipo9-206
Lbh-201	Cd8a-201		Col3a1-207	Gm340-201
Slx1b-201	Rbm47-206		1700011H14Rik-201	D1Pas1-201
Plekha7-220	Dst-215		Usp34-208	Fam131c-201
Rian-213	Usp7-207		Col2a1-209	Deptor-203
AC152063.6-217	Scml2-205		Vwf-201	Cd320-202
Stmnd1-201	F3-204		Olfr166-203	Slc41a2-201
D430019H16Rik-201	Ell2-201		Gria2-202	Rnf213-201
Ly6a-201	Islr2-202		Ecm1-204	Man1a-203
Sema6a-206	Cst12-202		Col3a1-203	Trip10-201
Gnal-201	Gm12958-201		Prune2-207	Nfkbiz-204
Rint1-203	Fam189a1-201		Prmt3-205	Pde4a-204
App-203	Tfap2c-201		Adam11-201	Cdyl-201
Pbx1-208	Naa11-201		Hivep2-205	Gramd2-203
Trpv4-205	Tiam1-214		Pcdhgb5-201	Fam81a-201
Nrip1-202	Anapc2-204		Fzd2-201	Mob4-201
Bmx-202	BC048644-202		B230219D22Rik-201	Rab3b-201
Apcdd1-201	Zfyve19-202		Hoxaas2-201	Hspa4-203
Wsb1-206	Ccnd3-218		Dysf-204	Myh7-201
Peg3-201	Pdgfra-201		Cpsf6-208	Gm44364-201
Snca-201	Hbb-bs-201		Cwc22-207	Akap1-201
Gja3-201	Tspan32-204		Grik2-201	Gfm2-202
Acox1-205	Zfp874a-202		Me3-202	Mkrn1-206
Myrf-201	Zfp125-203		Ncf4-201	Spcs2-210
Kif12-204	Dynlrb1-204		Cecr6-201	Gldn-201
Mdk-201	Gng13-201		Polrmt-213	Mtr-204
Spock3-201	Sema4a-201		Atp1a3-201	Kmt5b-203
Cd83-201	Qars-225		Adra2a-201	Khdc3-201
Trim11-202	Mfge8-202		Tmem132d-201	Aifm1-202
Btrc-209	Tnfrsf12a-201		Asic4-202	Rps24-203
Gm14951-201	Tox2-202		D430019H16Rik-201	Creb1-209
Epha7-208	Aasdh-201		Meis3-201	Gata4-203
Cux1-201	Olfr338-203		Foxp4-201	Tmem260-210
Galnt3-201	Rhox4a-201		Dnajb5-204	Kcnt1-207
Kctd15-202	Gramd1b-201		Kdelr1-204	Gata4-204
Cadm1-202	Serinc3-201		Fign-203	Fcho1-208
Olfm2-201	Gm3333-202		Pdlim5-201	Gata4-202
Gm16183-201	Plk3-201		Tgfbr1-201	Gm14414-201
Epor-201	Itgb7-201		Eml1-201	Pank2-202
Susd1-205	Ubap2-203		Tnmd-201	Taf6-207
Sytl5-201	Galnt10-202		Lmo4-201	Zfp109-201
Gm24420-201	Reep2-201		Sh3pxd2b-202	6430710C18Rik-204
Cx3cr1-202	Nphs1os-201		Gm3298-201	Tktl1-201
Ddah2-204	Gm27194-201		Kalrn-201	Tcl1-203
Gm27204-201	Folr1-202		M5C1000I18Rik-202	Prkcd-207
Armc8-204	Ubash3a-201		Neurl1a-201	Mphosph8-201
Pkhd1-201	Lhx1-201		Nudt14-205	4933416M07Rik-201
Prkg1-202	Pik3cb-201		Cyp26b1-204	Sema4a-201
Bcl11a-204	Ppt1-201		Shroom3-203	Stoml1-206
D330041H03Rik-206	Prr19-201		Vat1l-201	6030498E09Rik-201
Ppp1r1a-201	Mpc1-ps-201		Slc4a9-201	Strbp-202
Akr1e1-201	Tecpr2-202		Zmiz1os1-201	Rabep1-204
Fam46a-201	Sall2-201		P3h1-202	Bcas3-216
Gng10-202	Rad18-201		Gmfb-205	Nutm1-201
Sytl2-201	Tdrd1-203		Magt1-204	Lgals9-202
Usp29-205	Got1l1-204		Lama3-201	Syk-201
Chrm2-202	Sept9-205		Khdrbs2-201	Trim50-202
Hemgn-201	Efhd2-201		Lrrn3-201	Taf1-203
Kcnq4-201	Pla2g10-201		Epas1-201	Osbpl1a-203
4632427E13Rik-204	Gm29078-201		Lbp-201	Tacr3-201
Efnb3-201	Unc13b-201		Dmtn-208	Glrx-201
Pdgfrb-201	Rab3a-202		Golt1b-201	Dab2ip-201
Cd53-201	Gm9833-201		C1qb-201	Rhof-201
Slc22a15-207	Dock10-205		Mpeg1-201	Sirt5-206
Ip6k2-206	Raet1e-204		Cyth4-201	Spa17-201
Nnat-204	Etv1-206		Hoxb8-201	Slc22a18-204
Ip6k2-216	Nelfb-205		Wiz-202	Tigar-201
Atg7-212	Fbxw19-202		Irs4-201	Rsg1-201
Plk4-203	Banf1-202		Slitrk5-201	Fbxo2-201
Rbms3-205	Cbx7-203		Apol7d-201	Igsf11-202
Trpv2-202	Il11ra1-209		Fbln2-202	Cbx7-207
Elf5-201	Islr2-205		Hdac9-205	Sycp2-201
Wdr86-203	Kcp-208		Zfp691-202	Ube2d3-204
Ssc4d-203	Kit-204		Mc2r-201	Ninj1-205
Nfam1-201	Pdp1-206		Kcnmb4-201	Sybu-207
Slc16a13-201	Mbp-206		Clasp1-214	Stk16-208
Cacna1a-208	Atp1a2-202		Ppp3cb-201	Adcy3-202
Gm47547-201	Itgb5-201		C530008M17Rik-201	Irf9-205
Cyp20a1-203	Mettl23-201		Ccdc50-203	1110032A03Rik-204
Smim8-205	Prr23a3-201		Draxin-201	AI427809-203
Lig3-201	Derl3-203		Chd7-202	Me1-201
Lyrm1-207	Chka-209		Scn3a-202	Myo5b-210
Epb41-202	Dmp1-201		Rai2-202	Pus1-207
Acsl4-204	Fbxo15-201		A830082K12Rik-204	Znrf2-201
Myo15b-208	Ablim1-206		Cd200-201	Pacs2-202
Ptprk-202	Pxn-203		Cbx5-202	Gprc5a-201
Isl1-203	Gm5067-201		Kalrn-218	Glis3-202
Nog-201	Nanog-203		Clasp1-212	Spo11-202
H19-207	Emp1-201		Fgf5-201	Arid5b-203
Gpr146-201	Adamtsl3-203		Gemin8-202	Dnaja3-201
Large2-202	Socs2-203		Tmc7-201	Kcnip1-203
Serpinf1-201	Tlr3-202		Rnf112-202	Echdc2-212
Gm10259-201	Egflam-202		Gm3476-202	Uspl1-205
Rrnad1-211	Rps2-202		Pdlim7-201	Paip1-208
Cadps2-205	Sspn-202		Pdlim5-212	Gm11899-201
Stk32b-201	Rtf2-202		Gm32834-202	Snx27-207
Arhgef6-201	Gm10863-205		Meis2-201	Socs2-203
Gm12744-201	Smad5-206		Fap-202	Srsf12-201
Slc44a2-201	Aurkc-203		Hpgds-201	Nanos3-202
Oprl1-201	4930519K11Rik-201		Ganc-206	Rbm18-203
Csrp2-201	Paip1-206		Phactr1-208	Gm10769-201
Adam11-201	Pou2f3-202		Ptch1-201	Atp5o-203
Tmem132c-202	Cyp2ab1-201		Ralyl-203	Dnaja1-202
Tmem132c-203	Adgrg1-202		Cldn34c1-206	Ptpn2-203
Stmn3-201	Zfp534-201		Map7d2-201	Lgals9-203
Tmsb10-203	Npffr1-201		Hip1-201	Ung-204
Anks4b-201	Abtb2-201		Lsamp-201	Ints10-204
Aatk-203	Gstm7-203		Asb4-202	Nr5a1-202
Lyve1-202	Myef2-202		Sh3gl3-208	Zfp874a-202
Gpr17-201	Klhl20-202		Lpar1-205	Noxred1-201
Prtn3-201	Odf2-203		Bub1-204	Uqcr10-203
Taf7l-202	Olfr943-205		Popdc2-202	Lhx9-206
Htr7-205	Fbxo31-205		Nhsl2-202	Ung-206
Plat-201	Etv4-207		Gm3558-201	Gm5812-201
Vopp1-201	Gm7367-201		Tro-202	Spata5-201
Tet3-205	Pltp-201		Foxp1-228	Prickle1-202
Astn2-201	Zfp473-204		Cwc22-210	Mga-202
Dcc-201	Cebpa-201		Cdv3-202	Rad51d-204
Wnt9a-202	Pknox2-207		Pantr1-207	Phactr1-206
Tfec-201	Gm13031-201		Cyp26b1-205	Aftph-205
Rbm3-211	BC006965-203		Vcan-205	Klhl22-208
Misp-201	Etv1-212		Nr2f1-202	Gm17455-204
Ankrd6-204	Yap1-206		Nr2f2-202	Mir293-201
G6pc2-203	Gemin6-201		Myh10-203	mmu-mir-293.1-201
Pkp3-201	4930447C04Rik-204		Igsf9-201	Ewsr1-205
Mfsd6-205	Rangap1-202		Gm20482-202	Rps28-205
Ptprc-204	Efcab10-201		4931428F04Rik-202	Vdr-201
Acer2-201	Spg11-203		Tpm1-213	Slc45a4-202
Cdk14-202	Vegfd-201		Mtus1-203	Fbxo15-201
Nrk-203	Sppl2b-210		Alkbh1-205	Kcng3-201
Tm7sf2-202	Apoc2-201		Ch25h-201	Ipmk-203
Gm16000-201	Kdm3a-203		Nkain3-202	Camsap3-203
Cox7b-203	Osgin1-206		Fgf14-202	Tprn-201
Hcls1-201	Iars2-202		Dtna-202	Myb-203
Col26a1-202	Mybl2-201		Angpt2-202	Utp6-202
Ncoa7-209	Gm14124-201		Gja3-201	Usp53-207
Olfm1-201	Slc30a9-201		Adgre1-202	Glis3-209
Ank2-216	AC164297.2-201		Lifr-203	Rps6ka5-208
Sh3kbp1-208	Morc1-201		Fgf13-202	Soat1-201
Sept1-210	Ero1l-202		Fam168a-201	Aurkc-204
Mgat1-213	Pqlc1-207		Tpm1-205	Thnsl1-201
Meis1-207	Clcn7-204		Mir5114-201	BC034090-201
Npy-201	Ralgps2-204		Piezo2-202	Mir6357-201
Abcd3-204	Myo6-204		Prrxl1-202	Gm14288-201
Samd4-206	Ube2t-201		Hyal2-207	Gm26880-201
Crebzf-205	2410017I17Rik-202		Rnf165-201	Arhgap26-216
Gm13237-201	Zfp980-201		Igsf23-204	3110002H16Rik-203
Gm26870-201	Tnks2-207		Mecp2-205	Npw-201
Tmem37-201	Etv1-211		Gpr161-201	Acot1-204
1700001O22Rik-209	Cttn-201		Olfr901-203	Cacna1d-212
Dbn1-202	Pbx2-202		Pxylp1-203	Mis18bp1-208
Eps8l2-206	Gm48275-201		Gm3563-201	Dclk1-208
Cdh18-207	Kcnma1-234		Rabl6-208	Etnk2-205
Ly75-202	Rybp-202		Fam19a2-202	Gemin6-201
Ppwd1-201	Col9a3-204		Pknox2-210	Cab39l-206
Clasp1-206	1700061G19Rik-201		Hoxc4-202	Clu-209
Wdr6-201	Arl10-203		Fosl2-201	Ankrd42-208
Sfrp5-201	Nlrp5-ps-203		Glb1l2-202	H2-Ke6-201
Mapk12-201	Gm826-202		App-201	Slc25a33-201
Dact3-201	Rnf17-204		Marcks-201	Dnajc21-201
Pcsk1n-201	Greb1l-205		Hmg20b-213	Cyp17a1-201
Zfhx3-204	Jak3-201		Gm2026-201	Cars2-201
Mecp2-205	Psmb5-201		Cacna2d1-206	Gstp2-202
Kalrn-201	Nolc1-208		Mia2-223	Gstp2-201
Adamts20-204	Elmo1-205		Scnn1b-202	Gm12743-201
Gm26507-201	Zfp667-202		Smad9-201	Mthfr-206
Itga6-205	Arpp19-202		Mecom-207	Espn-204
Sh3bp5l-202	Arpc1b-211		Luzp1-203	Wt1os-203
Arhgef10l-201	Otoa-202		Vegfc-201	Prdx3-201
Tnfrsf14-201	Rims4-201		Lpar1-204	Uck2-201
Ap1s2-203	Rhox4a2-201		Gm14285-201	Mid1ip1-201
Gm12191-201	Ralgps2-215		Grm8-202	Coprs-201
Pla2g12a-202	Mark2-220		Ace-201	Ocel1-201
Mecom-212	Pde7a-210		Cep57-211	AL591207.1-203
Gm10256-201	Tspan18-205		Nap1l5-201	Vac14-203
Fgfr1-203	Sparc-209		Csrnp3-204	Rps9-201
Fmn1-204	Adam33-212		D030025E07Rik-203	Bag3-201
Tbc1d24-213	Gm28145-201		Rnf165-204	Fgd1-201
Gm17396-201	Pcsk6-204		Plet1-201	Pik3r1-201
Ccdc114-201	Atad2-202		Klk14-201	Poli-201
Ifi207-201	Tacc2-215		Ano4-208	Sphk1-205
Adarb1-203	Eno1-206		Il1r2-201	Tcf25-207
Rbfox3-204	Kank3-202		Fn1-216	Rtl4-202
Eif4e3-201	Fam114a1-201		Epb41l3-202	Cpeb1-209
Hoxd3-204	AC090962.1-201		Hand1-201	Kif23-206
Hlx-201	Atp2a3-207		Cldn7-201	Taf5l-201
4833420G17Rik-203	Cpeb1-207		Unc5c-201	Lhx9-205
Sult1d1-201	Plk4-204		Ano4-206	Rab35-201
Abcg5-201	Degs1-203		Lnx1-207	Serinc3-201
Adcy8-201	Klrb1c-203		Fgf20-201	1110004E09Rik-201
Serpinf1-208	Tnni1-208		Slc38a6-206	Dpcr1-201
Sc5d-201	Dpy19l4-202		Tfec-201	Dnajb6-202
Unc5c-202	Gm44364-201		Chrdl1-201	Pcgf5-211
Gm10600-201	Ralgps1-204		Hoxa1-201	Ftl1-ps1-202
AC154335.1-201	Als2-204		Ecm1-203	Polg-213
Dzip1-201	Hk3-201		Sdk2-205	Rbm33-201
Ctnnd2-201	Fam221a-204		Svep1-201	Zfp451-201
Cmah-208	Fancc-205		Kcnn2-203	Psme1-210
Stmn2-201	Smoc1-201		Gm10340-201	Fhl4-202
Qtrt1-206	Cst3-201		Npr3-205	L1td1-202
Psme1-201	Sema7a-201		Slc38a7-201	Cc2d1b-204
Mecom-217	Chit1-201		Olfr898-203	Pml-201
Epha3-201	Rpl10-206		Dhcr24-201	Tma16-202
Cadm1-203	Rpl34-204		Tmem47-201	Pm20d2-201
Tmtc4-209	Umodl1-202		Rbp1-201	Il11ra1-204
C330007P06Rik-201	Srebf1-210		Ptprt-201	Trim16-202
Zfp385b-201	Uty-205		Arnt2-201	Lcmt1-204
Hmga2-203	Sec16b-202		Insig2-213	Rhpn2-201
Hk3-203	Slc25a1-204		Plvap-201	Dclk2-209
Dach2-206	Klf15-203		Dach2-202	Rpap1-206
Chd3-202	Il17rb-203		Hacd4-203	Immt-205
Atp2c2-201	C1qtnf7-202		Gm10039-201	Slc7a5-201
Cys1-207	Irf8-201		Gm16096-202	G0s2-201
Rfesd-203	Bpnt1-201		Zeb2os-202	Hdac9-208
Ecm1-203	Tcf25-207		Ssr1-204	Mkx-201
Trmt61b-203	Srsf5-209		Hs3st6-201	Slc25a3-204
Glb1l-201	Trim44-202		Trpv2-201	Kmt5b-204
Dok3-202	Tulp2-202		Abcg5-203	Mir9-3hg-203
Micall2-204	Akap2-204		Armcx4-201	Mrpl23-201
Shh-201	St3gal4-207		Ppp4c-202	Platr14-203
Tcf12-207	Gm9-201		Dpysl4-202	Polg-203
Gas1-201	Coa7-205		AC174642.1-206	Chit1-201
Uba7-215	Cpsf4l-203		Gm10439-201	Crym-201
Ripk3-201	Capzb-203		Spon1-202	Bpnt1-201
Gm28510-201	Pdzd2-206		Mir1903-201	Tgif2-ps2-201
Tram1l1-201	Arhgdig-205		Kcnmb2-201	Porcn-206
Celsr1-201	Ubap1l-202		Gm46430-210	Gpbp1-201
Tox3-201	Crebzf-208		Klhl29-201	Dhx32-202
Zfp503-201	Cyp11a1-203		Klf1-201	Ears2-201
Trim9-201	Cyb5r3-203		Gpr50-201	Myo5b-201
Gm12915-201	Fcf1-202		Gria3-207	Tapbp-202
Bub1-204	Mfsd13a-201		Pld4-201	Arhgap42-202
Esrrg-203	Whamm-201		Fmn1-201	Rhox7a-201
Matk-201	Sgk3-201		Cck-201	Nsfl1c-201
H19-203	Tubgcp6-201		Dbn1-203	Nars2-201
Mthfr-207	Robo2-204		Nup85-207	Spint2-203
Mllt3-202	Spats2l-206		Crlf1-201	Rhox7a-203
Mtus2-208	Robo2-210		Ltbp1-201	Ptpn6-210
Slc17a5-202	Uba1y-201		Mdk-203	Mageb10-ps-201
Tmsb4x-201	P2rx4-209		Tnnt3-204	Gucy2c-201
Hmgn3-203	Bdh1-203		Arhgap28-201	Cd2bp2-201
3110070M22Rik-201	C030037D09Rik-202		Baiap2l2-201	Rnaset2b-201
Meis1-208	Triml2-204		Limk2-204	AU022751-201
Ktn1-202	Rad54b-201		Rmi2-201	Socs2-211
Aadat-201	Spock1-201		Arhgap20os-202	Cops7a-201
H2-Bl-204	Ccdc28b-204		Eml1-203	Ppp2r2b-201
Efna4-201	Fbxw8-202		Has2os-202	Pank2-201
Spsb4-201	Nrbp2-205		Id3-203	Exoc1-203
1700006J14Rik-201	Olfr1217-203		2610528A11Rik-201	Rad51c-201
Rasgrp4-209	Wdr75-207		Cd160-203	Gata4-201
Foxp1-230	Pxn-210		Sst-201	Zranb3-202
Pde10a-202	Tnni1-204		Plekhs1-203	Rap1gap-202
Zmat4-201	Khdc1a-201		Plce1-204	Eif4a2-201
Gm3252-201	Fetub-201		C730027H18Rik-202	Smad5-206
Rpsa-201	Tbx4-203		Atxn1l-201	Cpt1a-201
Crispld2-202	Slc35d3-201		Csnk1a1-210	Runx1t1-204
Adgra2-201	Gsta2-203		Scrn1-205	Ackr4-204
Phlda2-201	Enpp3-205		Mirg-207	Zwilch-209
Sept3-202	AU022751-201		Meis1-203	Cdx1-201
Macf1-203	Plxdc1-203		Jhy-201	Dym-201
Pcbd1-201	Zyg11a-202		Gm42557-201	Otud3-201
Shkbp1-204	Insig2-208		Cbln2-204	Nmrk1-201
Sms-201	Gm7972-201		Hsd17b7-201	Elmo1-201
Igfbp4-205	Cacna2d2-202		Ddah2-201	Pecam1-203
Adra2a-201	Mrpl48-205		Slc35e4-201	Gm14305-202
Plin5-202	Ptk2b-207		Stmn4-201	Rps2-204
Apobec3-217	Epx-201		Nrcam-215	Slc2a3-201
Gm11149-204	Trim6-205		Igf2-201	Tkt-206
Mxra8-203	Cradd-205		Nrep-203	Pot1a-209
Il6st-203	Tmem200b-201		Rxfp1-202	Ddx10-201
Flrt2-202	Myh14-205		Mmgt1-201	Msh6-201
Kcnmb2-201	Slc29a1-203		Fmn1-209	Fbxo47-201
Gm26870-203	Nmt2-203		Smarca2-203	B3gnt9-201
Plpp4-201	Plekha4-201		Meis2-204	Klhl32-202
Ace2-203	Msh4-207		Cxadr-201	Gm27308-201
Mybpc3-201	Krt222-203		BC018473-201	Prkcd-201
Sdc2-201	Mdfi-206		Ddc-210	Morc3-201
Ppfibp1-209	Olfr1215-202		Olfr1252-202	Dock3-201
Mpp2-201	Zbtb20-201		Myt1-201	Trmt11-201
Cttnbp2-208	Mst1r-201		Tmem213-201	Tph2-201
Tmem30b-201	Xpr1-203		Ndst1-201	Mkrn1-202
Lrriq1-205	Zfy1-202		P3h2-201	Diaph1-204
Ikzf2-201	AC139054.1-201		Opcml-202	Mir9-3hg-206
Zrsr1-201	Zfp58-201		Rarg-205	RF01962.1-209
Vgll4-204	Sbno1-202		Gnas-204	Fam221a-201
Gm16596-203	Mib1-203		Vmn2r36-201	Rrn3-201
Ogfod1-201	Myh8-201		Fam171b-201	Alg13-201
Gm16042-201	Zfp600-201		Foxp2-203	Emp1-206
Sytl2-202	Cadps-201		Megf10-202	Sytl4-201
B230206H07Rik-202	Mthfs-201		Foxp1-224	Mei4-202
Adgre1-202	Kpna2-206		Epha8-201	Polg2-201
Ptpn14-202	Map3k21-201		Olfml3-201	Gart-202
Myo5a-204	Otx2-204		Gm17501-202	Tpst2-201
4930426D05Rik-202	Dpy19l3-208		Card19-202	Gm43352-201
Epb41l3-211	Atg9b-201		Ifit2-201	Lrig1-202
Vkorc1-203	Kcnj12-203		Dlx1-201	Nod1-202
Slc7a8-201	Gm20865-202		Aadat-202	Eef2kmt-204
Gm21814-202	Adgrl3-203		Scn3b-201	Acadl-202
Tph1-202	Tigar-201		Epha3-201	Frat2-201
E330013P04Rik-201	Nek2-201		Arhgap24-204	Zfp964-201
Rrad-201	Nek2-205		Nrf1-208	Dph3-207
Cks1b-202	Rhox2b-201		Rarb-205	Rffl-206
Ppargc1a-204	Elavl2-201		Fzd7-201	Eps8-202
Tbrg4-211	S100a10-203		Adgra2-202	Ddc-206
Myl6-206	P2rx1-203		Ccdc40-202	1700001L05Rik-203
Rgma-204	Tmem44-203		Scg3-202	Ube2a-209
Sncaip-201	Zbtb41-202		Limch1-201	Lef1-204
Clcn5-201	Dcaf4-208		Pantr2-202	Ina-201
Mecom-206	Olfr1238-203		Cdh16-202	Plcb3-201
Lrrc7-206	Pde1a-210		Celf3-207	Echdc2-209
Pbx1-206	Khdc3-204		Ebf2-203	Eif4a2-203
Zfp827-206	Jade1-205		Arhgap28-202	Apoc1-201
Fgf20-201	Nkain4-205		Clec14a-201	Idh3a-205
Mef2c-201	Gm2694-210		Csrp1-201	Prpsap2-201
Rmi2-201	Clip3-202		Nrxn1-202	Clcn2-201
Olfr586-203	Tmem29-207		Ctgf-201	Apobec3-203
Actg2-201	Olfr859-203		Ugt1a5-201	Lpin3-201
Klk8-202	Lancl3-201		Dcdc2a-204	Klhl13-202
AC013548.1-201	Prlr-202		Gabra6-203	Btbd11-203
Ankra2-202	Tprn-201		Pbx1-207	Gm14435-202
Pax2-201	Sycp1-201		Sim1-202	Wnt10a-201
Ddr1-207	Jade1-203		Cdhr2-201	Zfp978-202
S1pr3-201	Cltb-201		Ccdc43-205	Tet1-207
Tvp23a-201	Ston1-203		Gm35065-201	Fut10-202
Chd7-202	Svil-211		Hjurp-204	Prmt7-201
Klhl14-201	Myt1l-204		Ddhd1-203	Zfand2b-201
Flna-213	Ptpn22-201		Tcaf1-201	Rpl39l-202
Dusp18-202	Gm8822-201		Kif12-204	Ogg1-201
Adamts3-201	Pgap2-203		Sptb-202	Anpep-202
Gemin8-204	Plekha6-211		Lrig3-203	Recql-201
Myh10-206	Gm3608-201		Kirrel3-209	Gm48795-201
Enpp2-201	Gm20684-201		Sntb1-201	Rplp1-201
Eif4g1-215	Aftph-209		Txndc16-211	Klhl21-201
Gm43539-201	Jcad-201		Maml2-202	Gm6089-201
C1qa-201	Rsrc2-210		Csrp2-207	Mbnl1-212
Ikzf4-208	Gm37565-201		Syt14-203	Kif3a-201
Mbnl1-206	Dnajc11-211		Megf9-202	Pqlc1-204
Tub-201	F930015N05Rik-201		Arl5b-202	Chchd10-202
Bcl9-201	Scml2-204		Hipk2-207	Foxa2-201
Nespas-201	Gpcpd1-211		Olfr575-202	Abhd6-201
Malt1-202	Itgb8-201		Klhl14-202	M1ap-203
Ikzf1-203	Col4a2-201		Arrb1-202	Nkx1-1-201
F630028O10Rik-201	Hmgb1-204		Mocs1-208	mt-Nd3-201
Kcnmb4os2-204	Fyn-202		Zcchc18-201	Ttc17-202
Ces3a-201	Wsb2-201		Lrrc49-208	Fmnl2-204
C230034O21Rik-201	Atp2c1-202		Hoxa9-203	Plekhf2-201
Mvk-205	Proser2-203		Dchs1-201	Myt1l-204
Surf1-204	Arntl2-204		Kif27-201	Phf13-201
Utrn-201	Ppfibp1-206		Eya1-203	Mms22l-205
Eno1b-201	Nop56-212		Med1-201	Dcaf7-202
Tug1-202	Syce2-204		Bglap3-202	Lman2l-202
Gm16140-201	Cd82-204		Tulp4-201	S100a1-201
Peg3-203	Rabep2-201		Celf4-203	Phf24-202
Pklr-201	Nmrk1-204		Kcnmb4os2-204	Pus1-203
Rarb-205	Agap1-202		Msh3-212	AC158554.1-202
Emx2-201	Atp8b2-201		Atoh8-201	D130058E05Rik-201
Adar-205	Pgp-201		Hba-x-201	Scrt2-201
Bcl2l12-201	Sp140-201		Lsamp-206	Immp2l-203
Cntnap2-201	Htra3-201		Hip1-209	Gclm-202
Gm25998-201	Egr1-201		Polq-201	Kdm3b-204
Hsd3b4-201	Kcng1-201		Pcdhgb4-202	Gm45765-201
Gm10681-203	Slc25a33-201		Asb9-201	Cecr2-201
Rhoay-ps1-201	Gm5128-202		9430002A10Rik-201	Egln3-201
Sae1-203	Spata5-209		Pcdh17-201	Trak1-211
Rnf43-209	Hjurp-201		Cdk19-205	Calr4-202
Foxf1-201	Ssh3-202		Lyz1-201	Dtnb-201
Mfhas1-201	Terf1-202		Vmn1r43-202	Fuz-214
Mllt6-202	Trak1-211		Elmod1-201	Srpx2-201
Homer3-203	Iffo1-205		Zfp871-202	Gclc-201
Smad4-202	Pqlc1-205		Meg3-205	Rap1gap-201
Smim10l1-202	Ttyh1-202		Armc8-204	Dut-202
Pisd-203	Pja1-201		Postn-207	Ap3b2-204
Col4a6-201	Gm4779-202		Adamts9-201	Timm10b-201
AV026068-208	Nkd2-201		Nedd4l-208	Gm3448-203
Rbp4-202	Klhl13-204		Shkbp1-206	Slc6a20a-201
Stx2-202	Dmc1-201		Ncam2-202	Arntl2-204
Dclre1b-204	Pla2g5-205		Pthlh-201	Ptpn14-203
Arhgdib-201	Tdh-205		Sgce-207	Tifa-202
Shank2-205	Synm-205		Id2-201	Fam160a2-203
Gm13111-201	Txnrd3-202		Hist1h2be-201	Fubp1-216
Gm13415-203	Rgcc-201		Cblb-201	Alkbh2-202
Lrba-206	Kazn-207		Tmpo-208	Dbp-204
Gtf2i-226	Cntn2-204		Pclaf-201	Arhgap21-208
Dab2-203	Olfr510-203		Sgk3-202	Ccdc61-207
D630045J12Rik-206	Clasp1-214		Slc1a3-202	Tnnt1-206
Ccnl1-206	Mafk-201		Scd1-201	Gm41-201
Ccdc40-202	Phf8-201		Itgbl1-201	Usp43-201
C1qtnf5-201	Mkrn1-203		Kcnmb4-204	Padi3-201
Rab33a-201	Baz2a-207		Gxylt1-201	Rtkn2-203
Mical3-202	Kcnk3-201		Heph-203	Tnxb-201
Frem2-201	Tjap1-201		Rbms3-201	Plekha8-201
Rarg-202	Snx25-208		Pde4a-201	Baiap3-202
Chst9-201	Gabpa-202		Pde4d-207	Gtsf1l-201
Chgb-201	Clk1-211		Sncaip-211	Gm42642-201
Slitrk5-201	Gm2223-201		Abca5-201	Smcr8-202
Gm3373-202	Ifi27-201		Gm12744-201	Adamdec1-201
Prrx2-203	Src-205		Atp8b1-201	Gclm-206
Gm47283-203	Bmp8a-202		Foxp2-217	Srcin1-202
Egr3-204	Cacna1h-201		Akap12-201	Fam20a-201
Evi2b-201	Cluap1-205		Rftn2-204	Cyp2r1-201
Ccdc61-207	Rhox2g-202		Abcc2-202	Gm8206-202
Gdf5-201	Txlna-205		Sema3b-205	Naa16-206
Far1-201	Ablim1-202		Wsb1-206	Slc11a2-206
Rpl15-ps2-201	Caprin2-202		Plekha5-214	Mrpl15-202
Itgb6-201	Hnrnpf-203		Tpm4-201	Dars2-203
Car2-201	Mst1r-204		Spi1-201	Fam173b-201
Hotairm1-202	Rps24-210		Pde3a-202	Slc39a14-211
Abca4-207	Gm29446-201		Slc6a19-202	Gm3235-201
Zfp663-202	Clk3-209		Akap13-201	Sycp1-201
Podxl-201	Hmgn2-204		Sncaip-205	Rab26-201
Capn3-205	Csde1-213		AV026068-205	Klf17-201
Cnn2-201	Ngef-201		Gm26778-201	Prrc2c-201
Gm45886-201	Hells-205		Hnf4a-201	Arhgef19-206
Dbndd1-201	Rgs11-211		Kctd15-202	Trmo-201
Cd59b-203	Ddx19b-202		Gm47512-201	Chdh-201
Zfp37-202	Banp-214		Zfp691-203	Amn-202
Srp54-206	Sipa1l2-204		Rab2b-203	Mtcl1-201
Hotairm1-203	Gtsf1-205		BC021767-202	Aldh2-202
Meg3-208	Itgad-201		Sfi1-219	Pkig-204
Fstl1-202	Gm22146-201		Bloc1s6-201	Bhmt-201
Llgl2-207	Atp2c1-212		Kcnj14-201	Atg14-201
Nrep-203	1700018B08Rik-204		Myl6-206	Esrp1-204
Prune2-207	Lrrfip1-203		Adgra2-201	Ap2b1-206
Mybpc1-205	Atg16l2-202		Fam78b-203	Mgme1-203
Arntl2-201	Dnmt3a-206		Zdhhc15-201	Rif1-201
Gm48283-201	Ppat-205		Frmd4a-216	Nfatc2ip-201
Rassf6-201	1700016F12Rik-201		Chsy3-201	Ikbkg-205
Kifc1-204	Acly-204		Astn1-201	Sfxn3-201
Uhrf1-202	Rtraf-201		Syn3-201	Sdccag3-201
Muc20-201	Syk-202		Olfr1419-203	Tkt-207
Mrgbp-206	Mep1a-201		Fndc3c1-202	Pecr-201
Syncrip-210	Rassf5-201		Trpm3-206	Utp4-201
Gm14226-201	Gm28533-202		Gpc2-205	Pold3-209
Adamts1-202	Ace2-202		Creb5-202	Ttc39b-201
Zfhx3-201	Trp63-201		Adam12-204	Bcat2-208
Asic4-202	Tex12-202		Cys1-207	Gtf2ird1-209
Caps2-201	Rhox1-201		Igf1-203	Rpl26-206
Fst-203	Gm46223-201		Pear1-202	Baiap2-205
Rab38-201	Gm10146-201		Olfr124-203	Glp1r-201
Steap2-204	Gcnt2-201		Erbb4-201	Art3-211
Setbp1-201	Olfr1369-ps1-203		Phldb1-215	Casp6-203
Sncg-201	Ptpre-201		Slc5a7-201	Slc23a2-201
Penk-201	Acbd5-202		Phf21b-203	Mtmr14-201
Wnk2-211	Abhd6-203		Hcn1-201	Ino80e-204
Parvg-201	Nln-205		Ispd-206	Magi1-207
Rbms3-201	Plcb2-203		Spin4-201	Lsr-201
Taf7l-201	Ankle1-203		Bmpr1b-204	Nrf1-216
Alx1-202	Traf1-203		Mboat2-204	Gtse1-201
Scin-201	Lef1-203		Tek-203	Slc7a4-201
Gm3629-201	Eps15-208		Elovl7-202	Caskin1-201
P4ha2-211	Slco4c1-201		Kynu-201	Aldh7a1-201
Lzts1-204	Axl-201		Cux1-206	Syt9-202
Cbln2-203	Tmem234-203		B130024G19Rik-206	Xlr3b-201
Veph1-201	4930461G14Rik-201		Itga9-201	Hsd17b2-201
Gm10282-201	Cdc7-201		Col8a2-201	Glrx2-208
Adra2c-201	Plekha4-210		Slc4a1-201	Lyrm7-205
Meis2-216	Pnmal2-201		Arhgap19-203	Washc1-201
Redrum-201	Adal-201		Hoxc5-202	Lrmp-204
Ap1m2-201	Gm27191-201		Snai1-201	Slco4c1-201
Tekt1-203	Nrf1-214		Arpp19-209	Magi2-207
Txndc16-211	Tspan5-202		Trim39-204	Gstm2-203
Rasef-202	Pax6-203		Fap-209	Defb42-201
Gm8797-201	Gbp3-201		Itgb6-203	Ctnnd1-202
Nxpe3-201	Nav2-202		Car7-204	2410017I17Rik-202
Tpbg-202	Mov10l1-205		Tia1-203	Ifnar1-201
Gm11149-201	A1cf-201		Hnrnpc-205	Rpgr-204
Adgrl3-220	Ucp2-210		Zim1-201	Il11ra1-210
Cdh2-203	St5-201		Agr2-201	Sobp-202
S100a16-202	Cdh23-206		Cd24a-201	Rpl34-204
Tmem56-201	8030451A03Rik-203		Cadm1-202	Fbxo6-202
Fmn1-209	Cyp19a1-201		Prkaa2-201	Sfmbt1-206
Gck-201	Gm14344-201		Mapk1ip1l-201	Ddx43-201
Josd2-204	Mup6-201		Meis1-204	Pnpla2-201
Rpsa-204	Sct-202		Galnt11-202	Fgfr2-207
Tro-203	Pex5l-205		Foxp1-222	Mir294-201
Ublcp1-202	Car9-202		Ntrk3-201	mmu-mir-294.1-201
Ggt1-215	Gm13110-201		Gm3326-201	Baiap2l1-201
Alx1-205	Cbx7-201		Cdh18-202	Gm14443-201
Susd4-202	Rps12-205		Sncg-201	Prmt3-201
Fgfr2-211	Slc37a1-201		Cpne4-201	Sycp1-204
Gm20696-201	Efhd1-202		Pla2g3-202	Srrm4-203
Sh3bp1-202	Gm4070-201		4933412E12Rik-201	Rmdn2-201
Nhsl1-201	Arhgef4-201		Gpr85-202	Slc44a1-201
Gm27530-201	Aasdh-214		Gak-205	Usp48-211
Gm26568-201	Vcp-202		Gm34030-202	Acss1-201
Rpl3-ps1-201	Rims3-204		Dbn1-202	Klhl5-204
Gm25956-201	Gm30122-202		Scarf2-201	Rpl35a-204
Cd84-205	Ankrd13a-201		Pbld1-202	Hadha-205
Tfcp2l1-201	Col6a3-202		Fhl1-205	Coq8a-217
G430049J08Rik-201	Gm15097-201		Epha5-202	Dgcr2-202
Gal3st4-203	Mapk4-204		Nrep-201	Ttyh1-217
Hmgn2-ps1-201	Ankrd42-203		Ebf2-202	Slc25a35-201
Limd2-201	Rbm46-202		Pdgfrb-202	Tdrd1-203
Spdya-204	Rad51ap1-203		Magi1-202	Taf1b-201
Id2-203	Rpl27a-201		Rem2-202	Arhgap4-202
Amn-201	Rps2-ps6-201		Nfatc4-208	Rgs2-201
Ecm1-207	Vmn1r90-204		Mzf1-206	Zfp385b-210
Igf1-206	Spo11-202		Col13a1-205	Cox18-202
Cgref1-201	Wdr64-205		Ints6l-204	Engase-207
Slc2a2-202	Gm17737-201		Cped1-202	1700028I16Rik-202
Csf1r-201	Rhox4g-201		Junos-207	Slc37a2-202
Slc25a22-202	Olfr1246-202		P4ha3-201	Echdc2-201
2610203C20Rik-206	Pds5a-203		Prkd3-202	AI481877-202
Dmtn-203	Rps4l-201		Dlk1-207	Lamp2-201
Rps3a1-201	Acan-201		AC165954.1-209	Syce2-202
Rbm5-214	Pitx2-201		4930426D05Rik-203	Ankrd27-202
9230102O04Rik-201	Zfp746-206		Spred3-201	Recql-203
Ighm-202	Mrto4-201		Zfp423-202	Camsap3-201
Dab2-204	Lsm14a-206		Map1b-206	Cul2-201
Kdf1-205	Adamts7-204		1700006J14Rik-202	C130071C03Rik-201
Slc26a1-204	Cachd1-202		Ticrr-205	Ggnbp2-201
A230065N10Rik-201	Zscan10-204		Gm9722-201	Adcy7-203
Csrp2-206	Wdcp-204		Pcdh11x-202	Gtf2e2-203
Gm45889-201	Ide-202		St7-206	Fbxo31-203
Chrnb2-202	Ttc26-201		Mrgpre-201	1700065D16Rik-201
Atxn1l-201	Trpa1-201		Runx2-212	Hmgb2-201
Gse1-201	Socs2-206		Dhh-201	Kcnk10-201
Fam69b-201	Ide-208		Fam199x-201	Selenbp1-201
Grik1-201	Mael-202		Stab1-203	Rhox8-201
Clu-202	Nmt2-201		Tgfb2-205	AL590629.2-201
Limk2-203	Vegfa-201		Hmgn3-201	Phkg1-201
Tnfrsf19-201	Got1l1-201		Agfg1-206	Rcl1-201
E430024I08Rik-201	AC134468.1-201		Samd14-201	Grk2-206
Ciz1-219	AC154671.1-201		Zswim9-202	Mcph1-205
Sec24a-203	Grk5-201		Thbs4-201	Wfdc6a-201
Nme7-207	Adgrg1-203		Tbx3-205	Klhl25-202
C130060K24Rik-203	Hes5-201		Sec24c-202	Pfkfb4-207
Eno3-202	Papln-201		Sema3b-204	Vmn1r32-202
Ptpa-203	Fam168a-210		Ralyl-205	Sybu-205
Pbx4-204	Btn1a1-201		Amotl2-201	Zfp27-206
Rassf9-201	Hook1-201		Cobl-210	Fxr1-204
Speg-206	Nfkbid-202		6820431F20Rik-202	2610027K06Rik-201
Ly6h-201	Rax-201		Nnat-210	Polg-216
4930473A02Rik-202	Ngef-204		Stra6-213	2010111I01Rik-213
4930550C14Rik-204	Ppp1r13b-203		Amotl1-201	Olig1-201
Aspscr1-214	Aunip-201		Sh2d4b-201	Taf1d-202
Prtn3-204	Thumpd3-202		Gm26507-201	Rfx2-202
Phf21b-203	Jak1-201		Sall2-202	Ephb1-201
Insc-208	Ung-203		Itga9-204	Ppp2r5c-206
Zswim5-201	Dynlt1-ps1-201		Tagln-203	Psat1-205
Tox-201	Rab27a-201		Arfip2-209	Gpr55-201
1600014C10Rik-205	Hpcal1-202		Mllt3-201	Mpp6-202
Frmd4a-202	Ucp2-202		Mrps30-202	Gm15262-202
Ell3-202	Spp1-204		Eml1-202	Ints6-204
Lsp1-202	Lrch1-204		Pbx1-206	Rundc3b-202
Spp2-201	Gm10535-201		Hoxa7-203	Cdkn1b-201
2410002F23Rik-210	Sema3g-201		Kcna3-201	Fgd6-201
Magi2-206	Elmo1-203		Hcrtr2-203	Gm10182-201
Clk1-201	Gm44520-201		Pak3-205	Gm14124-201
Prss23-205	Qrich2-201		Wnt11-202	Zdhhc23-201
Ugt1a2-201	Helb-203		Ggn-204	Asz1-203
Crocc-211	Birc6-220		Gpr22-201	Anapc15-205
Gfi1b-201	Camk1-202		Gm28661-201	Nxt1-202
Uba1y-ps1-201	Ola1-203		Manea-201	Ttc16-206
Plec-208	Spp1-201		Bicc1-203	Myhas-202
Amigo2-201	Dlc1-202		Meis2-213	Gm48222-201
Cdh9-202	1700080O16Rik-202		Rcn3-204	Nodal-201
Kalrn-206	Sil1-201		Ets1-202	Pdzd2-205
Rusc1-201	Carnmt1-201		Zfp518b-201	Klhl32-207
Golm1-201	Actn2-201		Trmt61b-203	Fam83g-201
Fbxl2-202	1700057H21Rik-201		Gm20559-202	Rps2-207
Nrp1-203	Cd244-204		Dusp18-202	Ttll12-203
Vgf-201	Gm3143-201		Slc8a1-202	Sez6-202
Ralyl-201	Ntrk2-207		Gnal-202	Mrm1-201
4833420G17Rik-202	Atg4a-ps-201		Gnas-215	Psd3-201
Clip1-213	Mme-201		Gm48505-201	Cdc7-201
Cpne5-204	Usp43-202		Pclo-203	Tubgcp4-212
Acy1-211	4930518J20Rik-201		Mex3a-201	Cecr2-202
Lin7c-201	Gm26603-201		NA	Pml-211
Golt1b-201	Irf1-202		Csrp2-206	Slc30a2-203
Fcho1-212	Aldh7a1-209		Prss23-205	Iah1-201
Runx2os1-201	Ttc39c-201		Epb41l3-211	Trp53inp1-202
Aldob-201	Rab35-201		Col2a1-207	Hacl1-201
Ndrg4-203	Pitpnm2-205		Rnf220-201	Rnf149-201
Stac-201	Cab39l-206		Peli2-205	BC048679-202
Dst-220	Puf60-204		Irs1-201	1700019D03Rik-201
Gm47512-201	Dmrtc1c2-201		Flrt2-202	Gm12940-202
Vmn2r22-201	C7-201		Shank1-203	Ints6-201
Gm19950-202	Rexo1-208		Syp-201	Pparg-204
Dpf3-203	Rpl3-206		Tox2-204	Ryr2-203
Smarcd3-208	Herc2-208		Sec24a-203	Golga4-204
[truncated: 1,800 more rows]
